# Supplementary material for: Sorghum Dw1, an agronomically important gene for lodging resistance, encodes a novel protein involved in cell proliferation
Source: PubMed Central journal article supplement (PMC4916599; doi:10.1038/srep28366), 2016-06-22
Supplement: srep28366-s1.pdf [file srep28366-s1.pdf]

**Title: Sorghum *Dw1*, an agronomically important gene for lodging resistance, encodes a novel protein involved in cell proliferation**

**Authors:** Miki Yamaguchi<sup>1</sup>, Haruka Fujimoto<sup>1</sup>, Ko Hirano<sup>1</sup>, Satoko Araki-Nakamura<sup>1</sup>, Kozue Ohmae-Shinohara<sup>1</sup>, Akihiro Fujii<sup>1</sup>, Masako Tsunashima<sup>2</sup>, Xian Jun Song<sup>1†</sup>, Yusuke Ito<sup>1</sup>, Rie Nagae<sup>1</sup>, Jianzhong Wu<sup>3</sup>, Hiroshi Mizuno<sup>3</sup>, Jun-ichi Yonemaru<sup>3</sup>, Takashi Matsumoto<sup>3</sup>, Hidemi Kitano<sup>1</sup>, Makoto Matsuoka<sup>1</sup>, Shigemitsu Kasuga<sup>4</sup>, Takashi Sazuka<sup>1\*</sup>

**Affiliations:**

<sup>1</sup>Bioscience and Biotechnology Center, Nagoya University, Furou-cho, Nagoya, Aichi 464-8601, Japan

<sup>2</sup>Plant Innovation Center, Japan Tobacco Inc., Iwata, Shizuoka 438-0802, Japan

<sup>3</sup>National Institute of Agrobiological Sciences, Kannondai, Tsukuba, Ibaraki 305-8602, Japan

<sup>4</sup>Education and Research Center of Alpine Field Science, Faculty of Agriculture, Shinshu University, Minamiminowa, Nagano 399-4598, Japan

<sup>†</sup>Present address: Key Laboratory of Plant Molecular Physiology, Institute of Botany, the Chinese Academy of Sciences, Beijing 100093, China.

\*Correspondence to:

Takashi Sazuka

Bioscience and Biotechnology Center, Nagoya University  
Chikusa, Nagoya 464-8601, Japan

Tel: +81-52-789-5217

Fax: +81-52-789-5226

E-mail: [sazuka@agr.nagoya-u.ac.jp](mailto:sazuka@agr.nagoya-u.ac.jp)

Supplementary figures: S1 to S7

Supplementary tables: S1

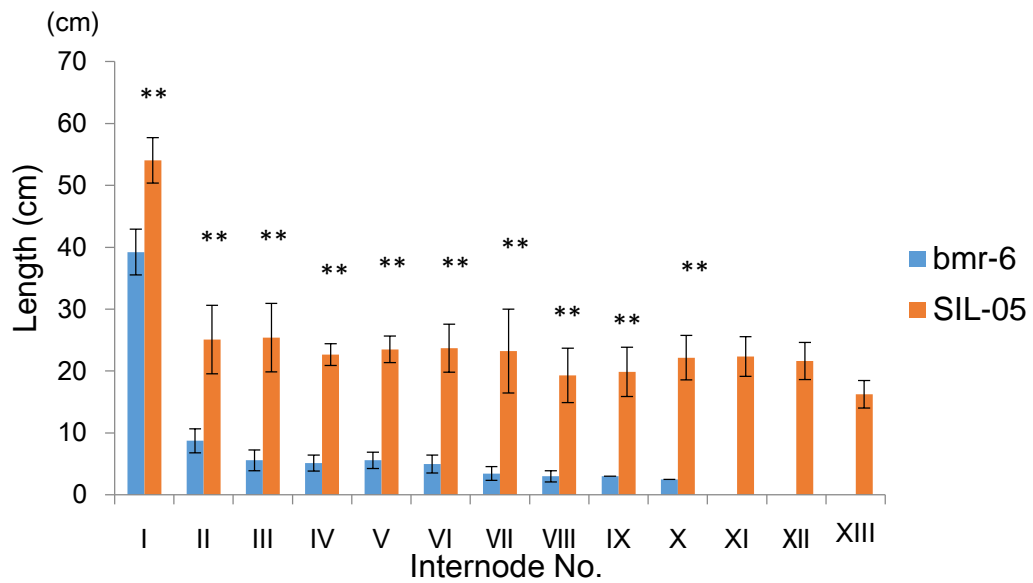

**Supplementary Figure S1 | Length of each internode of bmr-6 (blue) and SIL-05 (orange). Two asterisks indicates  $P < 0.01$ .**

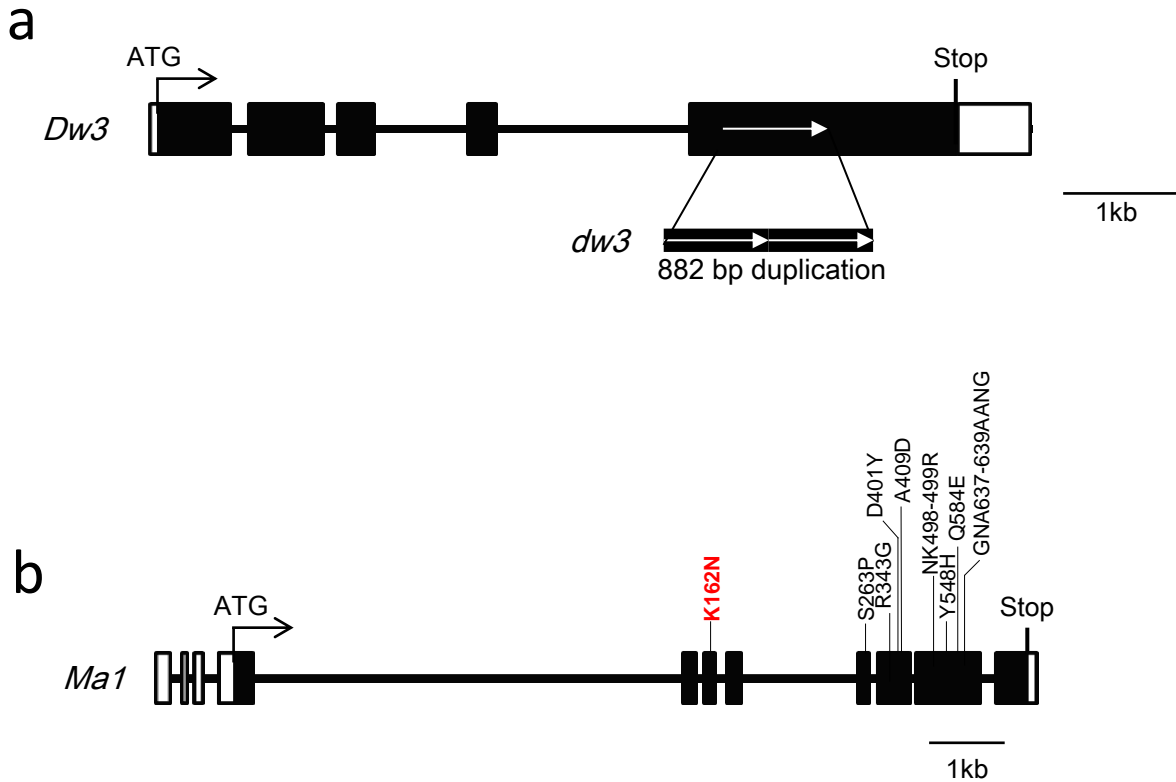

**Supplementary Figure S2 | *bmr-6* contains the loss-of-function alleles of *Dw3* and *Ma1*.** The gene structures of *Dw3* (a) and *Ma1* (b), and their mutations are shown. Protein coding regions and UTRs are represented by black and white boxes, respectively. Introns are indicated by black bars. 'ATG' and 'Stop' indicate the translation initiation and stop codons, respectively. (a) *bmr-6* contains a duplication of 882 bp in *Dw3*. (b) Positions of nine amino acid exchanges are shown, and the mutation K162N, which was reported (see text) is indicated in bold red.

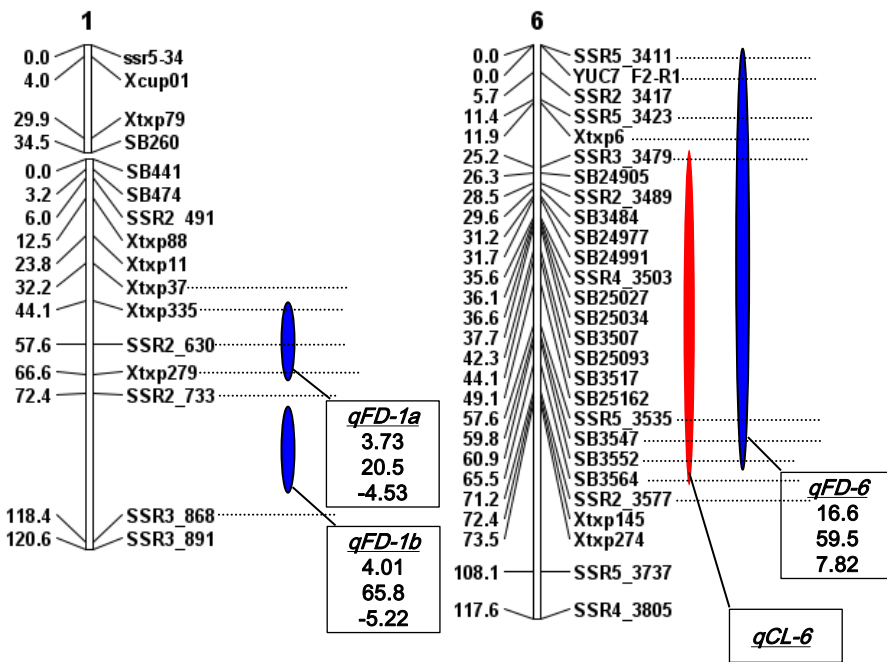

**Supplementary Figure S3 | QTL analysis for FD and a comparison of QTL map positions for FD and CL.** Blue and red ellipses indicate the positions of QTLs for FD and CL, respectively. Only chromosomes with LOD scores > 3.0 are shown. Information in the box is same as in Fig. 1e. The SIL-05 allele delayed the FD in *qFD-6*, and the bmr-6 allele accelerated the FD in *qFD-1a* and *qFD-1b*.

BTx623 1:CATACGTGTTTTACTTTTACACTATTGGTGGTGGCTTGACTCAACTGCTCAGTGCTCAGG 60  
Dwarf white milo 1:CATACGTGTTTTACTTTTACACTATTGGTGGTGGCTTGACTCAACTGCTCAGTGCTCAGG 60  
Tall white sooner milo 1:CATACGTGTTTTACTTTTACACTATTGGTGGTGGCTTGACTCAACTGCTCAGTGCTCAGG 60  
bmr-6 1:CATACGTGTTTTACTTTTACACTATTGGTGGTGGCTTGACTCAACTGCTCAGTGCTCAGG 60  
\*\*\*\*\*

BTx623 61:CACCTTGCTCGCCGCGCGCAGCAGCGGACGACGCAAGCGACGGCGCAGCTCCACCGC 120  
Dwarf white milo 61:CACCTTGCTCGCCGCGCGCAGCAGCGGACGACGCAAGCGACGGCGCAGCTCCACCGC 120  
Tall white sooner milo 61:CACCTTGCTCGCCGCGCGCAGCAGCGGACGACGCAAGCGACGGCGCAGCTCCACCGC 120  
bmr-6 61:CACCTTGCTCGCCGCGCGCAGCAGCGGACGACGCAAGCGACGGCGCAGCTCCACCGC 120  
\*\*\*\*\*

BTx623 121:TCTCCGCTCGATCCCTCTTCTCCATTTTCGAGGCGACGGCGCAGCTCCACCGCAC 180  
Dwarf white milo 121:TCTCCGCTCGATCCCTCTTCTCCATTTTCGAGGCGACGGCGCAGCTCCACCGCAC 180  
Tall white sooner milo 121:TCTCCGCTCGATCCCTCTTCTCCATTTTCGAGGCGACGGCGCAGCTCCACCGCAC 180  
bmr-6 121:TCTCCGCTCGATCCCTCTTCTCCATTTTCGAGGCGACGGCGCAGCTCCACCGCAC 180  
\*\*\*\*\*

BTx623 181:CGCGAGGCAAGGTCCCTCTTCTGTTGAGCTCGTCTCGGGTTCGGGGCGGGTTGAGTA 240  
Dwarf white milo 181:CGCGAGGCAAGGTCCCTCTTCTGTTGAGCTCGTCTCGGGTTCGGGGCGGGTTGAGTA 240  
Tall white sooner milo 181:CGCGAGGCAAGGTCCCTCTTCTGTTGAGCTCGTCTCGGGTTCGGGGCGGGTTGAGTA 240  
bmr-6 181:CGCGAGGCAAGGTCCCTCTTCTGTTGAGCTCGTCTCGGGTTCGGGGCGGGTTGAGTA 240  
\*\*\*\*\*

BTx623 241:TCTGATTCGGGTGCGGGTACGCGGATGCTCACCCGCCCGACCCGCTCCGTTGCCAT 300  
Dwarf white milo 241:TCTGATTCGGGTGCGGGTACGCGGATGCTCACCCGCCCGACCCGCTCCGTTGCCAT 300  
Tall white sooner milo 241:TCTGATTCGGGTGCGGGTACGCGGATGCTCACCCGCCCGACCCGCTCCGTTGCCAT 300  
bmr-6 241:TCTGATTCGGGTGCGGGTACGCGGATGCTCACCCGCCCGACCCGCTCCGTTGCCAT 300  
\*\*\*\*\*

BTx623 301:CCCGTGCCGTGCTACCCCTACCTTTTCTTCTCCGTTTACCACCCCTCGTGCGCTC 360  
Dwarf white milo 301:CCCGTGCCGTGCTACCCCTACCTTTTCTTCTCCGTTTACCACCCCTCGTGCGCTC 360  
Tall white sooner milo 301:CCCGTGCCGTGCTACCCCTACCTTTTCTTCTCCGTTTACCACCCCTCGTGCGCTC 360  
bmr-6 301:CCCGTGCCGTGCTACCCCTACCTTTTCTTCTCCGTTTACCACCCCTCGTGCGCTC 360  
\*\*\*\*\*

BTx623 361:TCCTCACTCTCACTCAGCTCTCTTTCTCTCTCGTGGGAGACGACTGGGCGACCCGCG 420  
Dwarf white milo 361:TCCTCACTCTCACTCAGCTCTCTTTCTCTCTCGTGGGAGACGACTGGGCGACCCGCG 420  
Tall white sooner milo 361:TCCTCACTCTCACTCAGCTCTCTTTCTCTCTCGTGGGAGACGACTGGGCGACCCGCG 420  
bmr-6 361:TCCTCACTCTCACTCAGCTCTCTTTCTCTCTCGTGGGAGACGACTGGGCGACCCGCG 420  
\*\*\*\*\*

BTx623 421:CGCCGACCGTGCTCAGGCCTTCGTCGAGACCATCGCCGGCGAAGAGCACCACAGGTAT 480  
Dwarf white milo 421:CGCCGACCGTGCTCAGGCCTTCGTCGAGACCATCGCCGGCGAAGAGCACCACAGGTAT 480  
Tall white sooner milo 421:CGCCGACCGTGCTCAGGCCTTCGTCGAGACCATCGCCGGCGAAGAGCACCACAGGTAT 480  
bmr-6 421:CGCCGACCGTGCTCAGGCCTTCGTCGAGACCATCGCCGGCGAAGAGCACCACAGGTAT 480  
\*\*\*\*\*

BTx623 481:GCGCACTTCTTGCTTCCCTCCAGATGCGCGAAACCGAGCAGCAAACCTAACTTAAG 540  
Dwarf white milo 481:GCGCACTTCTTGCTTCCCTCCAGATGCGCGAAACCGAGCAGCAAACCTAACTTAAG 540  
Tall white sooner milo 481:GCGCACTTCTTGCTTCCCTCCAGATGCGCGAAACCGAGCAGCAAACCTAACTTAAG 540  
bmr-6 481:GCGCACTTCTTGCTTCCCTCCAGATGCGCGAAACCGAGCAGCAAACCTAACTTAAG 540  
\*\*\*\*\*

BTx623 541:CTATTTGGCTATTTGACAGTGGATCTGATCTAATTACAGGTGCATACGCGATTATGCCT 600  
Dwarf white milo 541:CTATTTGGCTATTTGACAGTGGATCTGATCTAATTACAGGTGCATACGCGATTATGCCT 600  
Tall white sooner milo 541:CTATTTGGCTATTTGACAGTGGATCTGATCTAATTACAGGTGCATACGCGATTATGCCT 600  
bmr-6 541:CTATTTGGCTATTTGACAGTGGATCTGATCTAATTACAGGTGCATACGCGATTATGCCT 600  
\*\*\*\*\*

BTx623 601:ACTAATTCGATTCCTTGCAAAAATTGTCGGCTGTATTTGTGTACCCCATGCCATTTAC 660  
Dwarf white milo 601:ACTAATTCGATTCCTTGCAAAAATTGTCGGCTGTATTTGTGTACCCCATGCCATTTAC 660  
Tall white sooner milo 601:ACTAATTCGATTCCTTGCAAAAATTGTCGGCTGTATTTGTGTACCCCATGCCATTTAC 660  
bmr-6 601:ACTAATTCGATTCCTTGCAAAAATTGTCGGCTGTATTTGTGTACCCCATGCCATTTAC 660  
\*\*\*\*\*

BTx623 661:TGGGTCCGCTCTGATCCCGAGCAACCGTGTGTTTACAGTCAGAGATGCTTTCAGTTG 720  
Dwarf white milo 661:TGGGTCCGCTCTGATCCCGAGCAACCGTGTGTTTACAGTCAGAGATGCTTTCAGTTG 720  
Tall white sooner milo 661:TGGGTCCGCTCTGATCCCGAGCAACCGTGTGTTTACAGTCAGAGATGCTTTCAGTTG 720  
bmr-6 661:TGGGTCCGCTCTGATCCCGAGCAACCGTGTGTTTACAGTCAGAGATGCTTTCAGTTG 720  
\*\*\*\*\*

Figure S4 (page1)

BTx623 721:GGAGCAGCCCTGGCACCAGGGCGGCGAATGGTGCCGCTGCCATCAGTGCTGCCGCGACGG 780  
Dwarf white milo 721:GGAGCAGCCCTGGCACCAGGGCGGCGAATGGTGCCGCTGCCATCAGTGCTGCCGCGACGG 780  
Tall white sooner milo 721:GGAGCAGCCCTGGCACCAGGGCGGCGAATGGTGCCGCTGCCATCAGTGCTGCCGCGACGG 780  
bmr-6 721:GGAGCAGCCCTGGCACCAGGGCGGCGAATGGTGCCGCTGCCATCAGTGCTGCCGCGACGG 780  
\*\*\*\*\*

BTx623 781:CAGCAGGCTCAGCCGACGCCAGATTCCACTCCCAACTACTACAGCAGGACAGGGTACATA 840  
Dwarf white milo 781:CAGCAGGCTCAGCCGACGCCAGATTCCACTCCCAACTACTACAGCAGGACAGGGTACATA 840  
Tall white sooner milo 781:CAGCAGGCTCAGCCGACGCCAGATTCCACTCCCAACTACTACAGCAGGACAGGGTACATA 840  
bmr-6 781:CAGCAGGCTCAGCCGACGCCAGATTCCACTCCCAACTACTACAGCAGGACAGGGTACATA 840  
\*\*\*\*\*

BTx623 841:CACTATATACCATTGTTGTTCCATGGGCGGATGCAATCGGGCTTGGGCTTTAGCTGCAG 900  
Dwarf white milo 841:CACTATATACCATTGTTGTTCCATGGGCGGATGCAATCGGGCTTGGGCTTTAGCTGCAG 900  
Tall white sooner milo 841:CACTATATACCATTGTTGTTCCATGGGCGGATGCAATCGGGCTTGGGCTTTAGCTGCAG 900  
bmr-6 841:CACTATATACCATTGTTGTTCCATGGGCGGATGCAATCGGGCTTGGGCTTTAGCTGCAG 900  
\*\*\*\*\*

BTx623 901:CTTTGCTTGCATGCTTTAGATATGTGGACGACAGGATCAGTACCGGAATTTTGTAGTCG 960  
Dwarf white milo 901:CTTTGCTTGCATGCTTTAGATATGTGGACGACAGGATCAGTACCGGAATTTTGTAGTCG 960  
Tall white sooner milo 901:CTTTGCTTGCATGCTTTAGATATGTGGACGACAGGATCAGTACCGGAATTTTGTAGTCG 960  
bmr-6 901:CTTTGCTTGCATGCTTTAGATATGTGGACGACAGGATCAGTACCGGAATTTTGTAGTCG 960  
\*\*\*\*\*

BTx623 961:GCCTTGACGACCTAGATTGGCAATTTGGGCCAGCCTTTGCTTACTCAGTACGAATTGTAC 1020  
Dwarf white milo 961:GCCTTGACGACCTAGATTGGCAATTTGGGCCAGCCTTTGCTTACTCAGTACGAATTGTAC 1020  
Tall white sooner milo 961:GCCTTGACGACCTAGATTGGCAATTTGGGCCAGCCTTTGCTTACTCAGTACGAATTGTAC 1020  
bmr-6 961:GCCTTGACGACCTAGATTGGCAATTTGGGCCAGCCTTTGCTTACTCAGTACGAATTGTAC 1020  
\*\*\*\*\*

BTx623 1021:TGCCCTGCAGTGGTTATGACTTGAAACTGGGCATCTTTACCAGCAATAATTTGGCTTCAG 1080  
Dwarf white milo 1021:TGCCCTGCAGTGGTTATGACTTGAAACTGGGCATCTTTACCAGCAATAATTTGGCTTCAG 1080  
Tall white sooner milo 1021:TGCCCTGCAGTGGTTATGACTTGAAACTGGGCATCTTTACCAGCAATAATTTGGCTTCAG 1080  
bmr-6 1021:TGCCCTGCAGTGGTTATGACTTGAAACTGGGCATCTTTACCAGCAATAATTTGGCTTCAG 1080  
\*\*\*\*\*

BTx623 1081:TACTATATATATGCTTGGTTGCTTCTGTGACAGATAATTTATTTAGTTGGATTTTGTCTTTG 1140  
Dwarf white milo 1081:TACTATATATATGCTTGGTTGCTTCTGTGACAGATAATTTATTTAGTTGGATTTTGTCTTTG 1140  
Tall white sooner milo 1081:TACTATATATATGCTTGGTTGCTTCTGTGACAGATAATTTATTTAGTTGGATTTTGTCTTTG 1140  
bmr-6 1081:TACTATATATATGCTTGGTTGCTTCTGTGACAGATAATTTATTTAGTTGGATTTTGTCTTTG 1140  
\*\*\*\*\*

BTx623 1141:CTATGTTGTAATGCACACGTTTTGCACCTCCTATTTTGTTTTCAGTCCAGAGGCTTTTG 1200  
Dwarf white milo 1141:CTATGTTGTAATGCACACGTTTTGCACCTCCTATTTTGTTTTCAGTCCAGAGGCTTTTG 1200  
Tall white sooner milo 1141:CTATGTTGTAATGCACACGTTTTGCACCTCCTATTTTGTTTTCAGTCCAGAGGCTTTTG 1200  
bmr-6 1141:CTATGTTGTAATGCACACGTTTTGCACCTCCTATTTTGTTTTCAGTCCAGAGGCTTTTG 1200  
\*\*\*\*\*

BTx623 1201:TGATATCATTCTCCAGAGAATGTATATACTAATAAGTTCCTGATTTTACCCCTCGATAC 1260  
Dwarf white milo 1201:TGATATCATTCTCCAGAGAATGTATATACTAATAAGTTCCTGATTTTACCCCTCGATAC 1260  
Tall white sooner milo 1201:TGATATCATTCTCCAGAGAATGTATATACTAATAAGTTCCTGATTTTACCCCTCGATAC 1260  
bmr-6 1201:TGATATCATTCTCCAGAGAATGTATATACTAATAAGTTCCTGATTTTACCCCTCGATAC 1260  
\*\*\*\*\*

BTx623 1261:ACTCCCACCCATTTGATGTTGAAGTAGGGGCAAAAAGCTTTTACACCTGGGATAATCCTT 1320  
Dwarf white milo 1261:ACTCCCACCCATTTGATGTTGAAGTAGGGGCAAAAAGCTTTTACACCTGGGATAATCCTT 1320  
Tall white sooner milo 1261:ACTCCCACCCATTTGATGTTGAAGTAGGGGCAAAAAGCTTTTACACCTGGGATAATCCTT 1320  
bmr-6 1261:ACTCCCACCCATTTGATGTTGAAGTAGGGGCAAAAAGCTTTTACACCTGGGATAATCCTT 1320  
\*\*\*\*\*

BTx623 1321:GCTTTATGATAAAAATCTTTTTCCATGTGAATACTTTTGGATTTTGTGAAACACTAACA 1380  
Dwarf white milo 1321:GCTTTATGATAAAAATCTTTTTCCATGTGAATACTTTTGGATTTTGTGAAACACTAACA 1380  
Tall white sooner milo 1321:GCTTTATGATAAAAATCTTTTTCCATGTGAATACTTTTGGATTTTGTGAAACACTAACA 1380  
bmr-6 1321:GCTTTATGATAAAAATCTTTTTCCATGTGAATACTTTTGGATTTTGTGAAACACTAACA 1380  
\*\*\*\*\*

BTx623 1381:TTTCGTATGTTCTATTGTATGATTCCTTTGATGCTTATTCTTATGCATTTTTCTTCCCA 1440  
Dwarf white milo 1381:TTTCGTATGTTCTATTGTATGATTCCTTTGATGCTTATTCTTATGCATTTTTCTTCCCA 1440  
Tall white sooner milo 1381:TTTCGTATGTTCTATTGTATGATTCCTTTGATGCTTATTCTTATGCATTTTTCTTCCCA 1440  
bmr-6 1381:TTTCGTATGTTCTATTGTATGATTCCTTTGATGCTTATTCTTATGCATTTTTCTTCCCA 1440  
\*\*\*\*\*

Figure S4 (page2)

BTx623 1441: CAACACAATGATAATAAAAAATGTTTTTTTGTATACAAAGTATAGATTACTGCTCCTTTGA 1500  
Dwarf white milo 1441: CAACACAATGATAATAAAAAATGTTTTTTTGTATACAAAGTATAGATTACTGCTCCTTTGA 1500  
Tall white sooner milo 1441: CAACACAATGATAATAAAAAATGTTTTTTTGTATACAAAGTATAGATTACTGCTCCTTTGA 1500  
bmr-6 1441: CAACACAATGATAATAAAAAATGTTTTTTTGTATACAAAGTATAGATTACTGCTCCTTTGA 1500  
\*\*\*\*\*

BTx623 1501: AATTTGTTGTCATGTGTTTTCTTTTATTCTGTGGTGACAGCTAAGTTATTTGCTTGA 1560  
Dwarf white milo 1501: AATTTGTTGTCATGTGTTTTCTTTTATTCTGTGGTGACAGCTAAGTTATTTGCTTGA 1560  
Tall white sooner milo 1501: AATTTGTTGTCATGTGTTTTCTTTTATTCTGTGGTGACAGCTAAGTTATTTGCTTGA 1560  
bmr-6 1501: AATTTGTTGTCATGTGTTTTCTTTTATTCTGTGGTGACAGCTAAGTTATTTGCTTGA 1560  
\*\*\*\*\*

BTx623 1561: CTAACACACGCTTCTACTCTAAACAGCAAAGTAGATGGGCTGGCTGCTTTTCAGGTTT 1620  
Dwarf white milo 1561: CTAACACACGCTTCTACTCTAAACAGCAAAGTAGATGGGCTGGCTGCTTTTCAGGTTT 1620  
Tall white sooner milo 1561: CTAACACACGCTTCTACTCTAAACAGCAAAGTAGATGGGCTGGCTGCTTTTCAGGTTT 1620  
bmr-6 1561: CTAACACACGCTTCTACTCTAAACAGCAAAGTAGATGGGCTGGCTGCTTTTCAGGTTT 1620  
\*\*\*\*\*

BTx623 1621: ATCATGTTTCGGATCGCAGAAGGGCGGAAAAGAATTGTTCTGCAGCAGCTACTTCTGA 1680  
Dwarf white milo 1621: ATCATGTTTCGGATCGCAGAAGGGCGGAAAAGAATTGTTCTGCAGCAGCTACTTCTGA 1680  
Tall white sooner milo 1621: ATCATGTTTCGGATCGCAGAAGGGCGGAAAAGAATTGTTCTGCAGCAGCTACTTCTGA 1680  
bmr-6 1621: ATCATGTTTCGGATCGCAGAAGGGCGGAAAAGAATTGTTCTGCAGCAGCTACTTCTGA 1680  
\*\*\*\*\*

BTx623 1681: TGGGAATGGATCAAATGCTCGTGGAAATGGTCAATCTGGTGCCAATTCAAACCAAATAT 1740  
Dwarf white milo 1681: TGGGAATGGATCAAATGCTCGTGGAAATGGTCAATCTGGTGCCAATTCAAACCAAATAT 1740  
Tall white sooner milo 1681: TGGGAATGGATCAAATGCTCGTGGAAATGGTCAATCTGGTGCCAATTCAAACCAAATAT 1740  
bmr-6 1681: TGGGAATGGATCAAATGCTCGTGGAAATGGTCAATCTGGTGCCAATTCAAACCAAATAT 1740  
\*\*\*\*\*

BTx623 1741: GCCTATGAATTTATCTCTTCTGGCTCCACCATCATCACCAGCATCCTTCTCAAACCTGTC 1800  
Dwarf white milo 1741: GCCTATGAATTTATCTCTTCTGGCTCCACCATCATCACCAGCATCCTTCTCAAACCTGTC 1800  
Tall white sooner milo 1741: GCCTATGAATTTATCTCTTCTGGCTCCACCATCATCACCAGCATCCTTCTCAAACCTGTC 1800  
bmr-6 1741: GCCTATGAATTTATCTCTTCTGGCTCCACCATCATCACCAGCATCCTTCTCAAACCTGTC 1800  
\*\*\*\*\*

BTx623 1801: CCTTCCTTCGACTGCTCAATCACC GAATTGCTTTCTGTCTGTATCTGCAAACCTCCTCGG 1860  
Dwarf white milo 1801: CCTTCCTTCGACTGCTCAATCACC GAATTGCTTTCTGTCTGTATCTGCAAACCTCCTCGG 1860  
Tall white sooner milo 1801: CCTTCCTTCGACTGCTCAATCACC GAATTGCTTTCTGTCTGTATCTGCAAACCTCCTCGG 1860  
bmr-6 1801: CCTTCCTTCGACTGCTCAATCACC GAATTGCTTTCTGTCTGTATCTGCAAACCTCCTCGG 1860  
\*\*\*\*\*

BTx623 1861: CGGTCCAACGTCTAATATGTTGCTGTTGGGCCATATGCTAATGAACCTCAACTTGTTCTC 1920  
Dwarf white milo 1861: CGGTCCAACGTCTAATATGTTGCTGTTGGGCCATATGCTAATGAACCTCAACTTGTTCTC 1920  
Tall white sooner milo 1861: CGGTCCAACGTCTAATATGTTGCTGTTGGGCCATATGCTAATGAACCTCAACTTGTTCTC 1920  
bmr-6 1861: CGGTCCAACGTCTAATATGTTGCTGTTGGGCCATATGCTAATGAACCTCAACTTGTTCTC 1920  
\*\*\*\*\*

BTx623 1921: GCCACCTGTCTTCTCAAACCTACACAAGTACAGCATTGACCCACCACC 1980  
Dwarf white milo 1921: GCCACCTGTCTTCTCAAACCTACACAAGTACAGCATTGACCCACCACC 1980  
Tall white sooner milo 1921: GCCACCTGTCTTCTCAAACCTACACAAGTACAGCATTGACCCACCACC 1980  
bmr-6 1921: GCCACCTGTCTTCTCAAACCTACACAAGTACAGCATTGACCCACCACC 1980  
\*\*\*\*\*

BTx623 1981: TGAAGTACGCTCATGCAACAACGCCTTCTTCTCCAGATGTTCCATATGCTCGATTCTTTT 2040  
Dwarf white milo 1981: TGAAGTACGCTCATGCAACAACGCCTTCTTCTCCAGATGTTCCATATGCTCGATTCTTTT 2040  
Tall white sooner milo 1981: TGAAGTACGCTCATGCAACAACGCCTTCTTCTCCAGATGTTCCATATGCTCGATTCTTTT 2040  
bmr-6 1981: TGAAGTACGCTCATGCAACAACGCCTTCTTCTCCAGATGTTCCATATGCTCGATTCTTTT 2040  
\*\*\*\*\*

BTx623 2041: TTCTTCTATGGATATCTAAACTGCCAGCAAGGAGCATAACATGCCTTTCTTATCAACAGC 2100  
Dwarf white milo 2041: TTCTTCTATGGATATCTAAACTGCCAGCAAGGAGCATAACATGCCTTTCTTATCAACAGC 2100  
Tall white sooner milo 2041: TTCTTCTATGGATATCTAAACTGCCAGCAAGGAGCATAACATGCCTTTCTTATCAACAGC 2100  
bmr-6 2041: TTCTTCTATGGATATCTAAACTGCCAGCAAGGAGCATAACATGCCTTTCTTATCAACAGC 2100  
\*\*\*\*\*

BTx623 2101: CTATTCTGGTGGTTCAGGACTCCAGGCATCTACCCACTTTACCCTGAAAGCCCTTGATG 2160  
Dwarf white milo 2101: CTATTCTGGTGGTTCAGGACTCCAGGCATCTACCCACTTTACCCTGAAAGCCCTTGATG 2160  
Tall white sooner milo 2101: CTATTCTGGTGGTTCAGGACTCCAGGCATCTACCCACTTTACCCTGAAAGCCCTTGATG 2160  
bmr-6 2101: CTATTCTGGTGGTTCAGGACTCCAGGCATCTACCCACTTTACCCTGAAAGCCCTTGATG 2160  
\*\*\*\*\*

Figure S4 (page3)

BTx623 2161: CAGCCTCATCTCACCAGCTTCAGTAACCTCCGAGGACTGGTCTATCCTCACCTATACCTGA 2220  
Dwarf white milo 2161: CAGCCTCATCTCACCAGCTTCAGTAACCTCCGAGGACTGGTCTATCCTCACCTATACCTGA 2220  
Tall white sooner milo 2161: CAGCCTCATCTCACCAGCTTCAGTAACCTCCGAGGACTGGTCTATCCTCACCTATACCTGA 2220  
bmr-6 2161: CAGCCTCATCTCACCAGCTTCAGTAACCTCCGAGGACTGGTCTATCCTCACCTATACCTGA 2220  
\*\*\*\*\*

BTx623 2221: GCAAGAGGTTCTCCTGCCATTGGAAGACCTCTAGGTCCGCCTGCACACGCCATACTT 2280  
Dwarf white milo 2221: GCAAGAGGTTCTCCTGCCATTGGAAGACCTCTAGGTCCGCCTGCACACGCCATACTT 2280  
Tall white sooner milo 2221: GCAAGAGGTTCTCCTGCCATTGGAAGACCTCTAGGTCCGCCTGCACACGCCATACTT 2280  
bmr-6 2221: GCAAGAGGTTCTCCTGCCATTGGAAGACCTCTAGGTCCGCCTGCACACGCCATACTT 2280  
\*\*\*\*\*

BTx623 2281: CAGGGCTTCACCAATTCCTGAGCAAGAGACCACTGCACAATGGAAGACCTCTAGATCTGC 2340  
Dwarf white milo 2281: CAGGGCTTCACCAATTCCTGAGCAAGAGACCACTGCACAATGGAAGACCTCTAGATCTGC 2340  
Tall white sooner milo 2281: CAGGGCTTCACCAATTCCTGAGCAAGAGACCACTGCACAATGGAAGACCTCTAGATCTGC 2340  
bmr-6 2281: CAGGGCTTCACCAATTCCTGAGCAAGAGACCACTGCACAATGGAAGACCTCTAGATCTGC 2340  
\*\*\*\*\*

BTx623 2341: TTGTGACACACCGTATGCCAGGAACTCACCACCAATATTTTTGGTCTGGATTATCTAC 2400  
Dwarf white milo 2341: TTGTGACACACCGTATGCCAGGAACTCACCACCAATATTTTTGGTCTGGATTATCTAC 2400  
Tall white sooner milo 2341: TTGTGACACACCGTATGCCAGGAACTCACCACCAATATTTTTGGTCTGGATTATCTAC 2400  
bmr-6 2341: TTGTGACACACCGTATGCCAGGAACTCACCACCAATATTTTTGGTCTGGATTATCTAC 2400  
\*\*\*\*\*

BTx623 2401: CCCGAGAACTATATGCTAGATAGCAATTTCTTCGGCCAGCGGCATCTGCTCAATTCTA 2460  
Dwarf white milo 2401: CCCGAGAACTATATGCTAGATAGCAATTTCTTCGGCCAGCGGCATCTGCTCAATTCTA 2460  
Tall white sooner milo 2401: CCCGAGAACTATATGCTAGATAGCAATTTCTTCGGCCAGCGGCATCTGCTCAATTCTA 2460  
bmr-6 2401: CCCGAGAACTATATGCTAGATAGCAATTTCTTCGGCCAGCGGCATCTGCTCAATTCTA 2460  
\*\*\*\*\*

BTx623 2461: CCTGGACCAGGCTCAGCAGACGTTTCCACATAATGGCGGAGGGTTAGTGATCCAGGGA 2520  
Dwarf white milo 2461: CCTGGACCAGGCTCAGCAGACGTTTCCACATAATGGCGGAGGGTTAGTGATCCAGGGA 2520  
Tall white sooner milo 2461: CCTGGACCAGGCTCAGCAGACGTTTCCACATAATGGCGGAGGGTTAGTGATCCAGGGA 2520  
bmr-6 2461: CCTGGACCAGGCTCAGCAGACGTTTCCACATAATGGCGGAGGGTTAGTGATCCAGGGA 2520  
\*\*\*\*\*

BTx623 2521: GAAGCAAGATGCCGATGAAATCGAAGCTTACAGAGCTTCATTTGGGTTTAGTGCTGATGA 2580  
Dwarf white milo 2521: GAAGCAAGATGCCGATGAAATCGAAGCTTACAGAGCTTCATTTGGGTTTAGTGCTGATGA 2580  
Tall white sooner milo 2521: GAAGCAAGATGCCGATGAAATCGAAGCTTACAGAGCTTCATTTGGGTTTAGTGCTGATGA 2580  
bmr-6 2521: GAAGCAAGATGCCGATGAAATCGAAGCTTACAGAGCTTCATTTGGGTTTAGTGCTGATGA 2580  
\*\*\*\*\*

BTx623 2581: AATTGTCCAATCTCAATCTTATGTGGGATACCAGATGCGGTTGATGAGTCATTAGTAT 2640  
Dwarf white milo 2581: AATTGTCCAATCTCAATCTTATGTGGGATACCAGATGCGGTTGATGAGTCATTAGTAT 2640  
Tall white sooner milo 2581: AATTGTCCAATCTCAATCTTATGTGGGATACCAGATGCGGTTGATGAGTCATTAGTAT 2640  
bmr-6 2581: AATTGTCCAATCTCAATCTTATGTGGGATACCAGATGCGGTTGATGAGTCATTAGTAT 2640  
\*\*\*\*\*

BTx623 2641: ATCACCATTTGAAACAATGCTCCTGCTACTGAGATATGCCCATTTAGTGATCTGCCTAA 2700  
Dwarf white milo 2641: ATCACCATTTGAAACAATGCTCCTGCTACTGAGATATGCCCATTTAGTGATCTGCCTAA 2700  
Tall white sooner milo 2641: ATCACCATTTGAAACAATGCTCCTGCTACTGAGATATGCCCATTTAGTGATCTGCCTAA 2700  
bmr-6 2641: ATCACCATTTGAAACAATGCTCCTGCTACTGAGATATGCCCATTTAGTGATCTGCCTAA 2700  
\*\*\*\*\*

BTx623 2701: TGAGGTTGAGAAGTGGATAAATCATGTGCCTACGCTAAAGATGGCACAAGTCCAAAGAA 2760  
Dwarf white milo 2701: TGAGGTTGAGAAGTGGATAAATCATGTGCCTACGCTAAAGATGGCACAAGTCCAAAGAA 2760  
Tall white sooner milo 2701: TGAGGTTGAGAAGTGGATAAATCATGTGCCTACGCTAAAGATGGCACAAGTCCAAAGAA 2760  
bmr-6 2701: TGAGGTTGAGAAGTGGATAAATCATGTGCCTACGCTAAAGATGGCACAAGTCCAAAGAA 2760  
\*\*\*\*\*

BTx623 2761: ATCAGCAAACCAACTCTCCATTGATTCTCCAATAAAGTTCTGCGCTTGGACGTTGTTCAA 2820  
Dwarf white milo 2761: ATCAGCAAACCAACTCTCCATTGATTCTCCAATAAAGTTCTGCGCTTGGACGTTGTTCAA 2820  
Tall white sooner milo 2761: ATCAGCAAACCAACTCTCCATTGATTCTCCAATAAAGTTCTGCGCTTGGACGTTGTTCAA 2820  
bmr-6 2761: ATCAGCAAACCAACTCTCCATTGATTCTCCAATAAAGTTCTGCGCTTGGACGTTGTTCAA 2820  
\*\*\*\*\*

BTx623 2821: AGGTAACATTGGATTTTTCTTGGTACTGTGTGAAATAAATAATCTGCTGAATTGAAATACA 2880  
Dwarf white milo 2821: AGGTAACATTGGATTTTTCTTGGTACTGTGTGAAATAAATAATCTGCTGAATTGAAATACA 2880  
Tall white sooner milo 2821: AGGTAACATTGGATTTTTCTTGGTACTGTGTGAAATAAATAATCTGCTGAATTGAAATACA 2880  
bmr-6 2821: AGGTAACATTGGATTTTTCTTGGTACTGTGTGAAATAAATAATCTGCTGAATTGAAATACA 2880  
\*\*\*\*\*



BTx623 2881:TATTGTAGGCTGATTTGTACACCCAGATTTTAAATAGTAACAAATTTGTTATGGCCCTACT 2940  
Dwarf white milo 2881:TATTGTAGGCTGATTTGTACACCCAGATTTTAAATAGTAACAAATTTGTTATGGCCCTACT 2940  
Tall white sooner milo 2881:TATTGTAGGCTGATTTGTACACCCAGATTTTAAATAGTAACAAATTTGTTATGGCCCTACT 2940  
bmr-6 2881:TATTGTAGGCTGATTTGTACACCCAGATTTTAAATAGTAACAAATTTGTTATGGCCCTACT 2940  
\*\*\*\*\*

BTx623 2941:ATTGTTGTGTTTCTGTTTCCACATGCTTATTGTGTTTCTGTTCTCAAATGGCAGGAACAA 3000  
Dwarf white milo 2941:ATTGTTGTGTTTCTGTTTCCACATGCTTATTGTGTTTCTGTTCTCAAATGGCAGGAACAA 3000  
Tall white sooner milo 2941:ATTGTTGTGTTTCTGTTTCCACATGCTTATTGTGTTTCTGTTCTCAAATGGCAGGAACAA 3000  
bmr-6 2941:ATTGTTGTGTTTCTGTTTCCACATGCTTATTGTGTTTCTGTTCTCAAATGGCAGGAACAA 3000  
\*\*\*\*\*

BTx623 3001:AAGGAGGTCATCAGTCTGAGGACGAGGGTATTGTGAAAGATGGTCATCCTTTCAGAAGGA 3060  
Dwarf white milo 3001:AAGGAGGTCATCAGTCTGAGGACGAGGGTATTGTGAAAGATGGTCATCCTTTCAGAAGGA 3060  
Tall white sooner milo 3001:AAGGAGGTCATCAGTCTGAGGACGAGGGTATTGTGAAAGATGGTCATCCTTTCAGAAGGA 3060  
bmr-6 3001:AAGGAGGTCATCAGTCTGAGGACGAGGGTATTGTGAAAGATGGTCATCCTTTCAGAAGGA 3060  
\*\*\*\*\*

BTx623 3061:CAACAGATGAAATATCTCTAAAACCCATAGAAGTAAGGAAGAAATCTTCTCCTGGCCATT 3120  
Dwarf white milo 3061:CAACAGATGAAATATCTCTAAAACCCATAGAAGTAAGGAAGAAATCTTCTCCTGGCCATT 3120  
Tall white sooner milo 3061:CAACAGATGAAATATCTCTAAAACCCATAGAAGTAAGGAAGAAATCTTCTCCTGGCCATT 3120  
bmr-6 3061:CAACAGATGAAATATCTCTAAAACCCATAGAAGTAAGGAAGAAATCTTCTCCTGGCCATT 3120  
\*\*\*\*\*

BTx623 3121:CTTGCTCAGATGCAGAAATCGAGTACAGAAGGACAAGGAGTTTGAGGGATGCCAATGGTG 3180  
Dwarf white milo 3121:CTTGCTCAGATGCAGAAATCGAGTACAGAAGGACAAGGAGTTTGAGGGATGCCAATGGTG 3180  
Tall white sooner milo 3121:CTTGCTCAGATGCAGAAATCGAGTACAGAAGGACAAGGAGTTTGAGGGATGCCAATGGTG 3180  
bmr-6 3121:CTTGCTCAGATGCAGAAATCGAGTACAGAAGGACAAGGAGTTTGAGGGATGCCAATGGTG 3180  
\*\*\*\*\*

BTx623 3181:TTTTATCGCGGCGGAGTGCATTGGCAAGACAATTGCATTAATAAGTCACTAGTATGCAGG 3240  
Dwarf white milo 3181:TTTTATCGCGGCGGAGTGCATTGGCAAGACAATTGCATTAATAAGTCACTAGTATGCAGG 3240  
Tall white sooner milo 3181:TTTTATCGCGGCGGAGTGCATTGGCAAGACAATTGCATTAATAAGTCACTAGTATGCAGG 3240  
bmr-6 3181:TTTTATCGCGGCGGAGTGCATTGGCAAGACAATTGCATTAATAAGTCACTAGTATGCAGG 3240  
\*\*\*\*\*

BTx623 3241:GTAATTTTCATAGTTTCATGTAGCCTAATGTGCATTGAATTCGAGCTGTCATTAGAGTGATC 3300  
Dwarf white milo 3241:GTAATTTTCATAGTTTCATGTAGCCTAATGTGCATTGAATTCGAGCTGTCATTAGAGTGATC 3300  
Tall white sooner milo 3241:GTAATTTTCATAGTTTCATGTAGCCTAATGTGCATTGAATTCGAGCTGTCATTAGAGTGATC 3300  
bmr-6 3241:GTAATTTTCATAGTTTCATGTAGCCTAATGTGCATTGAATTCGAGCTGTCATTAGAGTGATC 3300  
\*\*\*\*\*

BTx623 3301:TGTAGCCGAAGAGTAGCCTTTATCGTATATGAGGATTATATTACCAGTTTGTGTTCTAGA 3360  
Dwarf white milo 3301:TGTAGCCGAAGAGTAGCCTTTATCGTATATGAGGATTATATTACCAGTTTGTGTTCTAGA 3360  
Tall white sooner milo 3301:TGTAGCCGAAGAGTAGCCTTTATCGTATATGAGGATTATATTACCAGTTTGTGTTCTAGA 3360  
bmr-6 3301:TGTAGCCGAAGAGTAGCCTTTATCGTATATGAGGATTATATTACCAGTTTGTGTTCTAGA 3360  
\*\*\*\*\*

BTx623 3361:TATGTGATGATGAGCTTGTACTCTGTTTGAACCTCAAAGATCCTCTTTGTAGACACTCAA 3420  
Dwarf white milo 3361:TATGTGATGATGAGCTTGTACTCTGTTTGAACCTCAAAGATCCTCTTTGTAGACACTCAA 3420  
Tall white sooner milo 3361:TATGTGATGATGAGCTTGTACTCTGTTTGAACCTCAAAGATCCTCTTTGTAGACACTCAA 3420  
bmr-6 3361:TATGTGATGATGAGCTTGTACTCTGTTTGAACCTCAAAGATCCTCTTTGTAGACACTCAA 3420  
\*\*\*\*\*

BTx623 3421:TCGTTCCGAGGAGCAGTGAATGAAATATCGTTGGTACATTATTACAGGAGTTGTGTTTT 3480  
Dwarf white milo 3421:TCGTTCCGAGGAGCAGTGAATGAAATATCGTTGGTACATTATTACAGGAGTTGTGTTTT 3480  
Tall white sooner milo 3421:TCGTTCCGAGGAGCAGTGAATGAAATATCGTTGGTACATTATTACAGGAGTTGTGTTTT 3480  
bmr-6 3421:TCGTTCCGAGGAGCAGTGAATGAAATATCGTTGGTACATTATTACAGGAGTTGTGTTTT 3480  
\*\*\*\*\*

BTx623 3481:GGTCTTACTGATGATGTAGGCTGTGTTTGAATTTGCAGCCTGCTGATTGGGAATCTTTG 3540  
Dwarf white milo 3481:GGTCTTACTGATGATGTAGGCTGTGTTTGAATTTGCAGCCTGCTGATTGGGAATCTTTG 3540  
Tall white sooner milo 3481:GGTCTTACTGATGATGTAGGCTGTGTTTGAATTTGCAGCCTGCTGATTGGGAATCTTTG 3540  
bmr-6 3481:GGTCTTACTGATGATGTAGGCTGTGTTTGAATTTGCAGCCTGCTGATTGGGAATCTTTG 3540  
\*\*\*\*\*

BTx623 3541:TTCTTTTTATTGTCATGTCAGCAAGACAGCAACTTGTGTAACACAATCAATCTGACGTCT 3600  
Dwarf white milo 3541:TTCTTTTTATTGTCATGTCAGCAAGACAGCAACTTGTGTAACACAATCAATCTGACGTCT 3600  
Tall white sooner milo 3541:TTCTTTTTATTGTCATGTCAGCAAGACAGCAACTTGTGTAACACAATCAATCTGACGTCT 3600  
bmr-6 3541:TTCTTTTTATTGTCATGTCAGCAAGACAGCAACTTGTGTAACACAATCAATCTGACGTCT 3600  
\*\*\*\*\*

Figure S4 (page5)

BTx623 3601:AGGTTCTTATATATATACGCAAAGAAAGCAACAGCTGGTCGACGTCAAGAATATTTTGAA 3660  
Dwarf white milo 3601:AGGTTCTTATATATATATACGCAAAGAAAGCAACAGCTGGTCGACGTCAAGAATATTTTGAA 3660  
Tall white sooner milo 3601:AGGTTCTTATATATATACGCAAAGAAAGCAACAGCTGGTCGACGTCAAGAATATTTTGAA 3660  
bmr-6 3601:AGGTTCTTATATATATACGCAAAGAAAGCAACAGCTGGTCGACGTCAAGAATATTTTGAA 3660  
\*\*\*\*\*

BTx623 3661:CTGTTTTCACTTGTGCGATGATTATTATTATTCTGCTACATAAAAAAACTTTTGACAC 3720  
Dwarf white milo 3661:CTGTTTTCACTTGTGCGATGATTATTATTATTCTGCTACATAAAAAAACTTTTGACAC 3720  
Tall white sooner milo 3661:CTGTTTTCACTTGTGCGATGATTATTATTATTCTGCTACATAAAAAAACTTTTGACAC 3720  
bmr-6 3661:CTGTTTTCACTTGTGCGATGATTATTATTATTCTGCTACATAAAAAAACTTTTGACAC 3720  
\*\*\*\*\*

BTx623 3721:ATCTGCTGCTCCTCTGACGTAACGGAGAGACGTCACCTTTGCCGTTCAAACCTAAATCGGGC 3780  
Dwarf white milo 3721:ATCTGCTGCTCCTCTGACGTAACGGAGAGACGTCACCTTTGCCGTTCAAACCTAAATCGGGC 3780  
Tall white sooner milo 3721:ATCTGCTGCTCCTCTGACGTAACGGAGAGACGTCACCTTTGCCGTTCAAACCTAAATCGGGC 3780  
bmr-6 3721:ATCTGCTGCTCCTCTGACGTAACGGAGAGACGTCACCTTTGCCGTTCAAACCTAAATCGGGC 3780  
\*\*\*\*\*

BTx623 3781:CCAACGCTCCTCCCGCATGAGTATATTTGTTTTAGGCTCTGTTAGTCCAGAAAATTT 3840  
Dwarf white milo 3781:CCAACGCTCCTCCCGCATGAGTATATTTGTTTTAGGCTCTGTTAGTCCAGAAAATTT 3840  
Tall white sooner milo 3781:CCAACGCTCCTCCCGCATGAGTATATTTGTTTTAGGCTCTGTTAGTCCAGAAAATTT 3840  
bmr-6 3781:CCAACGCTCCTCCCGCATGAGTATATTTGTTTTAGGCTCTGTTAGTCCAGAAAATTT 3840  
\*\*\*\*\*

BTx623 3841:TGCAAATTGTTTCGGATTTCCCGTCACATCGAATCTTACGGTACATACATGAAACATTAA 3900  
Dwarf white milo 3841:TGCAAATTGTTTCGGATTTCCCGTCACATCGAATCTTACGGTACATACATGAAACATTAA 3900  
Tall white sooner milo 3841:TGCAAATTGTTTCGGATTTCCCGTCACATCGAATCTTACGGTACATACATGAAACATTAA 3900  
bmr-6 3841:TGCAAATTGTTTCGGATTTCCCGTCACATCGAATCTTACGGTACATACATGAAACATTAA 3900  
\*\*\*\*\*

BTx623 3901:ATATAGCAAAAAAATAACTAATTACACAGTTTAGCAGTAATTTACGAGACGAATATTTG 3960  
Dwarf white milo 3901:ATATAGCAAAAAAATAACTAATTACACAGTTTAGCAGTAATTTACGAGACGAATATTTG 3960  
Tall white sooner milo 3901:ATATAGCAAAAAAATAACTAATTACACAGTTTAGCAGTAATTTACGAGACGAATATTTG 3960  
bmr-6 3901:ATATAGCAAAAAAATAACTAATTACACAGTTTAGCAGTAATTTACGAGACGAATATTTG 3960  
\*\*\*\*\*

BTx623 3961:TCAAATACAACGAAAGTGCTACAGTGTGCGTTTTGACAATTTTTTGAACCTAAACAAG 4020  
Dwarf white milo 3961:TCAAATACAACGAAAGTGCTACAGTGTGCGTTTTGACAATTTTTTGAACCTAAACAAG 4020  
Tall white sooner milo 3961:TCAAATACAACGAAAGTGCTACAGTGTGCGTTTTGACAATTTTTTGAACCTAAACAAG 4020  
bmr-6 3961:TCAAATACAACGAAAGTGCTACAGTGTGCGTTTTGACAATTTTTTGAACCTAAACAAG 4020  
\*\*\*\*\*

BTx623 4021:GCCTTAGTCTTCTATGCAATTTTGTGGAAGGCGCTCAAGAATAGCATTTCAGCAAGGGT 4080  
Dwarf white milo 4021:GCCTTAGTCTTCTATGCAATTTTGTGGAAGGCGCTCAAGAATAGCATTTCAGCAAGGGT 4080  
Tall white sooner milo 4021:GCCTTAGTCTTCTATGCAATTTTGTGGAAGGCGCTCAAGAATAGCATTTCAGCAAGGGT 4080  
bmr-6 4021:GCCTTAGTCTTCTATGCAATTTTGTGGAAGGCGCTCAAGAATAGCATTTCAGCAAGGGT 4080  
\*\*\*\*\*

BTx623 4081:AGCATTAGAAGAGGCTGTCAATGAATAATGAAGATACAAGTATAAAAACAAAGTGAATATG 4140  
Dwarf white milo 4081:AGCATTAGAAGAGGCTGTCAATGAATAATGAAGATACAAGTATAAAAACAAAGTGAATATG 4140  
Tall white sooner milo 4081:AGCATTAGAAGAGGCTGTCAATGAATAATGAAGATACAAGTATAAAAACAAAGTGAATATG 4140  
bmr-6 4081:AGCATTAGAAGAGGCTGTCAATGAATAATGAAGATACAAGTATAAAAACAAAGTGAATATG 4140  
\*\*\*\*\*

BTx623 4141:AAAGCCAGGGCTTGTTTTCCGGTGATAATGCTTACGCTTTAAGAATTTTTCGCGTTTATTA 4200  
Dwarf white milo 4141:AAAGCCAGGGCTTGTTTTCCGGTGATAATGCTTACGCTTTAAGAATTTTTCGCGTTTATTA 4200  
Tall white sooner milo 4141:AAAGCCAGGGCTTGTTTTCCGGTGATAATGCTTACGCTTTAAGAATTTTTCGCGTTTATTA 4200  
bmr-6 4141:AAAGCCAGGGCTTGTTTTCCGGTGATAATGCTTACGCTTTAAGAATTTTTCGCGTTTATTA 4200  
\*\*\*\*\*

BTx623 4201:GTCGATTAGATGTTACATTATCGTTAGGCAAACGTTTGCTGTGTTTTGGTGTCTTTTTA 4260  
Dwarf white milo 4201:GTCGATTAGATGTTACATTATCGTTAGGCAAACGTTTGCTGTGTTTTGGTGTCTTTTTA 4260  
Tall white sooner milo 4201:GTCGATTAGATGTTACATTATCGTTAGGCAAACGTTTGCTGTGTTTTGGTGTCTTTTTA 4260  
bmr-6 4201:GTCGATTAGATGTTACATTATCGTTAGGCAAACGTTTGCTGTGTTTTGGTGTCTTTTTA 4260  
\*\*\*\*\*

BTx623 4261:ATTGCATGCTGCTGCTTATGTTAAGTAGTAGTATCCATCCTCTGTCATCCTGTTACAAAT 4320  
Dwarf white milo 4261:ATTGCATGCTGCTGCTTATGTTAAGTAGTAGTATCCATCCTCTGTCATCCTGTTACAAAT 4320  
Tall white sooner milo 4261:ATTGCATGCTGCTGCTTATGTTAAGTAGTAGTATCCATCCTCTGTCATCCTGTTACAAAT 4320  
bmr-6 4261:ATTGCATGCTGCTGCTTATGTTAAGTAGTAGTATCCATCCTCTGTCATCCTGTTACAAAT 4320  
\*\*\*\*\*

Figure S4 (page6)

BTx623 4321:GATCTGTTATTGTTGTTTTGTAATGGGCCTGTTGGTTCCCTTCATTA AAAACTTAGCTAC 4380  
Dwarf white milo 4321:GATCTGTTATTGTTGTTTTGTAATGGGCCTGTTGGTTCCCTTCATTA AAAACTTAGCTAC 4380  
Tall white sooner milo 4321:GATCTGTTATTGTTGTTTTGTAATGGGCCTGTTGGTTCCCTTCATTA AAAACTTAGCTAC 4380  
bmr-6 4321:GATCTGTTATTGTTGTTTTGTAATGGGCCTGTTGGTTCCCTTCATTA AAAACTTAGCTAC 4380  
\*\*\*\*\*

BTx623 4381:TAAAAC TATTTAGCTACTCTTAGGTAAGTGGGACTAAAGTATTTTATCTTCTTTTT 4440  
Dwarf white milo 4381:TAAAAC TATTTAGCTACTCTTAGGTAAGTGGGACTAAAGTATTTTATCTTCTTTTT 4440  
Tall white sooner milo 4381:TAAAAC TATTTAGCTACTCTTAGGTAAGTGGGACTAAAGTATTTTATCTTCTTTTT 4440  
bmr-6 4381:TAAAAC TATTTAGCTACTCTTAGGTAAGTGGGACTAAAGTATTTTATCTTCTTTTT 4440  
\*\*\*\*\*

BTx623 4441:AGTTAGTGTGTTTGAAGTTT TAGCTACTAAAGTACTAAAGTTTAGCTGACTAAAATTTA 4500  
Dwarf white milo 4441:AGTTAGTGTGTTTGAAGTTT TAGCTACTAAAGTACTAAAGTTTAGCTGACTAAAATTTA 4500  
Tall white sooner milo 4441:AGTTAGTGTGTTTGAAGTTT TAGCTACTAAAGTACTAAAGTTTAGCTGACTAAAATTTA 4500  
bmr-6 4441:AGTTAGTGTGTTTGAAGTTT TAGCTACTAAAGTACTAAAGTTTAGCTGACTAAAATTTA 4500  
\*\*\*\*\*

BTx623 4501:GTAAGGTGAACCAACAGGCCATTGTAATAAAGGACTAGAATTTGTAACAATATAGGA 4560  
Dwarf white milo 4501:GTAAGGTGAACCAACAGGCCATTGTAATAAAGGACTAGAATTTGTAACAATATAGGA 4560  
Tall white sooner milo 4501:GTAAGGTGAACCAACAGGCCATTGTAATAAAGGACTAGAATTTGTAACAATATAGGA 4560  
bmr-6 4501:GTAAGGTGAACCAACAGGCCATTGTAATAAAGGACTAGAATTTGTAACAATATAGGA 4560  
\*\*\*\*\*

BTx623 4561:AGTCATAAGGAGTACCCTAGCATTGTCAAGAGAGAGAAGCTCAATTGAACATGGCGTTA 4620  
Dwarf white milo 4561:AGTCATAAGGAGTACCCTAGCATTGTCAAGAGAGAGAAGCTCAATTGAACATGGCGTTA 4620  
Tall white sooner milo 4561:AGTCATAAGGAGTACCCTAGCATTGTCAAGAGAGAGAAGCTCAATTGAACATGGCGTTA 4620  
bmr-6 4561:AGTCATAAGGAGTACCCTAGCATTGTCAAGAGAGAGAAGCTCAATTGAACATGGCGTTA 4620  
\*\*\*\*\*

BTx623 4621:CTAGAAAAATACAGTCGTTTCCCTCCTTATCTTTTGAACCATAATACAAGTACA AATC 4680  
Dwarf white milo 4621:CTAGAAAAATACAGTCGTTTCCCTCCTTATCTTTTGAACCATAATACAAGTACA AATC 4680  
Tall white sooner milo 4621:CTAGAAAAATACAGTCGTTTCCCTCCTTATCTTTTGAACCATAATACAAGTACA AATC 4680  
bmr-6 4621:CTAGAAAAATACAGTCGTTTCCCTCCTTATCTTTTGAACCATAATACAAGTACA AATC 4680  
\*\*\*\*\*

BTx623 4681:CCACAGGCCGTCCTGAGCGCCATCTCATGATTATGATCTTATAATTACTT CATGTAAA 4740  
Dwarf white milo 4681:CCACAGGCCGTCCTGAGCGCCATCTCATGATTATGATCTTATAATTACTT CATGTAAA 4740  
Tall white sooner milo 4681:CCACAGGCCGTCCTGAGCGCCATCTCATGATTATGATCTTATAATTACTT CATGTAAA 4740  
bmr-6 4681:CCACAGGCCGTCCTGAGCGCCATCTCATGATTATGATCTTATAATTACTT CATGTAAA 4740  
\*\*\*\*\*

BTx623 4741:CATGCCAAGACCTCACATTGGCACCCCTTAATCCGGAATGTGATGCATAGTCCTTTGGACA 4800  
Dwarf white milo 4741:CATGCCAAGACCTCACATTGGCACCCCTTAATCCGGAATGTGATGCATAGTCCTTTGGACA 4800  
Tall white sooner milo 4741:CATGCCAAGACCTCACATTGGCACCCCTTAATCCGGAATGTGATGCATAGTCCTTTGGACA 4800  
bmr-6 4741:CATGCCAAGACCTCACATTGGCACCCCTTAATCCGGAATGTGATGCATAGTCCTTTGGACA 4800  
\*\*\*\*\*

BTx623 4801:TCTGTGCTATGTACAAAGTTTCTTCCGAAGGCTCTGTGGCAGCATGATCCATCTATCCTC 4860  
Dwarf white milo 4801:TCTGTGCTATGTACAAAGTTTCTTCCGAAGGCTCTGTGGCAGCATGATCCATCTATCCTC 4860  
Tall white sooner milo 4801:TCTGTGCTATGTACAAAGTTTCTTCCGAAGGCTCTGTGGCAGCATGATCCATCTATCCTC 4860  
bmr-6 4801:TCTGTGCTATGTACAAAGTTTCTTCCGAAGGCTCTGTGGCAGCATGATCCATCTATCCTC 4860  
\*\*\*\*\*

BTx623 4861:ATACCCCTATAGCAGCTAGTGTCTAGCTATTGGGCTTCTTGTCCACCCAAATTCTCAAG 4920  
Dwarf white milo 4861:ATACCCCTATAGCAGCTAGTGTCTAGCTATTGGGCTTCTTGTCCACCCAAATTCTCAAG 4920  
Tall white sooner milo 4861:ATACCCCTATAGCAGCTAGTGTCTAGCTATTGGGCTTCTTGTCCACCCAAATTCTCAAG 4920  
bmr-6 4861:ATACCCCTATAGCAGCTAGTGTCTAGCTATTGGGCTTCTTGTCCACCCAAATTCTCAAG 4920  
\*\*\*\*\*

BTx623 4921:GTATGAAAACCTCTTGGTTGCAACTGATGACATCTTTGTGACGCTTTGGACCGTTACCCCTC 4980  
Dwarf white milo 4921:GTATGAAAACCTCTTGGTTGCAACTGATGACATCTTTGTGACGCTTTGGACCGTTACCCCTC 4980  
Tall white sooner milo 4921:GTATGAAAACCTCTTGGTTGCAACTGATGACATCTTTGTGACGCTTTGGACCGTTACCCCTC 4980  
bmr-6 4921:GTATGAAAACCTCTTGGTTGCAACTGATGACATCTTTGTGACGCTTTGGACCGTTACCCCTC 4980  
\*\*\*\*\*

BTx623 4981:CTTGCCATATGTTCTGAGGCTTGGTCCCGTGGGCCACGTAGTCACATAGCATCGGCGA 5040  
Dwarf white milo 4981:CTTGCCATATGTTCTGAGGCTTGGTCCCGTGGGCCACGTAGTCACATAGCATCGGCGA 5040  
Tall white sooner milo 4981:CTTGCCATATGTTCTGAGGCTTGGTCCCGTGGGCCACGTAGTCACATAGCATCGGCGA 5040  
bmr-6 4981:CTTGCCATATGTTCTGAGGCTTGGTCCCGTGGGCCACGTAGTCACATAGCATCGGCGA 5040  
\*\*\*\*\*

Figure S4 (page7)

BTx623 5041:TACTGGTTCCATTCTCCTCATCTTCTCTACCTCAGCCTTAGCATCCGAGACAACCTTGTC 5100  
Dwarf white milo 5041:TACTGGTTCCATTCTCCTCATCTTCTCTACCTCAGCCTTAGCATCCGAGACAACCTTGTC 5100  
Tall white sooner milo 5041:TACTGGTTCCATTCTCCTCATCTTCTCTACCTCAGCCTTAGCATCCGAGACAACCTTGTC 5100  
bmr-6 5041:TACTGGTTCCATTCTCCTCATCTTCTCTACCTCAGCCTTAGCATCCGAGACAACCTTGTC 5100  
\*\*\*\*\*

BTx623 5101:GGTGTCTGCTGAAGTTAAACTGGCGATTATCATTGATTCTGCGTTCTGGGATCTTGTTGT 5160  
Dwarf white milo 5101:GGTGTCTGCTGAAGTTAAACTGGCGATTATCATTGATTCTGCGTTCTGGGATCTTGTTGT 5160  
Tall white sooner milo 5101:GGTGTCTGCTGAAGTTAAACTGGCGATTATCATTGATTCTGCGTTCTGGGATCTTGTTGT 5160  
bmr-6 5101:GGTGTCTGCTGAAGTTAAACTGGCGATTATCATTGATTCTGCGTTCTGGGATCTTGTTGT 5160  
\*\*\*\*\*

BTx623 5161:GGCCAAGTCCGCATTGAGAATCTTCGATTTCGAGACATGACTGTGAAAGCTAAGCTCTC 5220  
Dwarf white milo 5161:GGCCAAGTCCGCATTGAGAATCTTCGATTTCGAGACATGACTGTGAAAGCTAAGCTCTC 5220  
Tall white sooner milo 5161:GGCCAAGTCCGCATTGAGAATCTTCGATTTCGAGACATGACTGTGAAAGCTAAGCTCTC 5220  
bmr-6 5161:GGCCAAGTCCGCATTGAGAATCTTCGATTTCGAGACATGACTGTGAAAGCTAAGCTCTC 5220  
\*\*\*\*\*

BTx623 5221:CAGAGTCTGGAGTAACCTCCAAAATGGCAAGGCCAACATCCTGATGAAGAAAAAGGGT 5280  
Dwarf white milo 5221:CAGAGTCTGGAGTAACCTCCAAAATGGCAAGGCCAACATCCTGATGAAGAAAAAGGGT 5280  
Tall white sooner milo 5221:CAGAGTCTGGAGTAACCTCCAAAATGGCAAGGCCAACATCCTGATGAAGAAAAAGGGT 5280  
bmr-6 5221:CAGAGTCTGGAGTAACCTCCAAAATGGCAAGGCCAACATCCTGATGAAGAAAAAGGGT 5280  
\*\*\*\*\*

BTx623 5281:AGAAGGGAGGTATGCAAATATGCGAGTAACAAGCACTGTGGCGTATCTGAAAAGGCA 5340  
Dwarf white milo 5281:AGAAGGGAGGTATGCAAATATGCGAGTAACAAGCACTGTGGCGTATCTGAAAAGGCA 5340  
Tall white sooner milo 5281:AGAAGGGAGGTATGCAAATATGCGAGTAACAAGCACTGTGGCGTATCTGAAAAGGCA 5340  
bmr-6 5281:AGAAGGGAGGTATGCAAATATGCGAGTAACAAGCACTGTGGCGTATCTGAAAAGGCA 5340  
\*\*\*\*\*

BTx623 5341:ATGTTAATTCTGAATGCTTCTGTACCTTGTTCATTGGATTTTGCTTATGCTAGGGAC 5400  
Dwarf white milo 5341:ATGTTAATTCTGAATGCTTCTGTACCTTGTTCATTGGATTTTGCTTATGCTAGGGAC 5400  
Tall white sooner milo 5341:ATGTTAATTCTGAATGCTTCTGTACCTTGTTCATTGGATTTTGCTTATGCTAGGGAC 5400  
bmr-6 5341:ATGTTAATTCTGAATGCTTCTGTACCTTGTTCATTGGATTTTGCTTATGCTAGGGAC 5400  
\*\*\*\*\*

BTx623 5401:GACTGGGCGATGCCAGGAAATCTGTGCTTGATAAGGAGAAGAACATTCTGCCCCTCCCT 5460  
Dwarf white milo 5401:GACTGGGCGATGCCAGGAAATCTGTGCTTGATAAGGAGAAGAACATTCTGCCCCTCCCT 5460  
Tall white sooner milo 5401:GACTGGGCGATGCCAGGAAATCTGTGCTTGATAAGGAGAAGAACATTCTGCCCCTCCCT 5460  
bmr-6 5401:GACTGGGCGATGCCAGGAAATCTGTGCTTGATAAGGAGAAGAACATTCTGCCCCTCCCT 5460  
\*\*\*\*\*

BTx623 5461:TCAAACATTCCTCTTCTCGTGACTGACGTTATGCCCCACGACAATTTGCTGTCCTTG 5520  
Dwarf white milo 5461:TCAAACATTCCTCTTCTCGTGACTGACGTTATGCCCCACGACAATTTGCTGTCCTTG 5520  
Tall white sooner milo 5461:TCAAACATTCCTCTTCTCGTGACTGACGTTATGCCCCACGACAATTTGCTGTCCTTG 5520  
bmr-6 5461:TCAAACATTCCTCTTCTCGTGACTGACGTTATGCCCCACGACAATTTGCTGTCCTTG 5520  
\*\*\*\*\*

BTx623 5521:TGGGTCATTTTCTTCTGCCAGATGACTACTGAGGCTTCGACTCGGTTCTTCAGATCAACA 5580  
Dwarf white milo 5521:TGGGTCATTTTCTTCTGCCAGATGACTACTGAGGCTTCGACTCGGTTCTTCAGATCAACA 5580  
Tall white sooner milo 5521:TGGGTCATTTTCTTCTGCCAGATGACTACTGAGGCTTCGACTCGGTTCTTCAGATCAACA 5580  
bmr-6 5521:TGGGTCATTTTCTTCTGCCAGATGACTACTGAGGCTTCGACTCGGTTCTTCAGATCAACA 5580  
\*\*\*\*\*

BTx623 5581:ATGTTGTGTTTCATCCGACAAGTCTACAGAGCGTAGAAGTTCTTCAGGGTCAAATAATCG 5640  
Dwarf white milo 5581:ATGTTGTGTTTCATCCGACAAGTCTACAGAGCGTAGAAGTTCTTCAGGGTCAAATAATCG 5640  
Tall white sooner milo 5581:ATGTTGTGTTTCATCCGACAAGTCTACAGAGCGTAGAAGTTCTTCAGGGTCAAATAATCG 5640  
bmr-6 5581:ATGTTGTGTTTCATCCGACAAGTCTACAGAGCGTAGAAGTTCTTCAGGGTCAAATAATCG 5640  
\*\*\*\*\*

BTx623 5641:TCGGTTATAAGTTTGTACATTGAATCTCCAAGGGTGGACTTCCATTCTAGCAGACATAT 5700  
Dwarf white milo 5641:TCGGTTATAAGTTTGTACATTGAATCTCCAAGGGTGGACTTCCATTCTAGCAGACATAT 5700  
Tall white sooner milo 5641:TCGGTTATAAGTTTGTACATTGAATCTCCAAGGGTGGACTTCCATTCTAGCAGACATAT 5700  
bmr-6 5641:TCGGTTATAAGTTTGTACATTGAATCTCCAAGGGTGGACTTCCATTCTAGCAGACATAT 5700  
\*\*\*\*\*

BTx623 5701:AACAAGAGAAGTTATAGAGTTATATTGTTAGAGCTGTTGTAACAGAATATGGCAAGGCC 5760  
Dwarf white milo 5701:AACAAGAGAAGTTATAGAGTTATATTGTTAGAGCTGTTGTAACAGAATATGGCAAGGCC 5760  
Tall white sooner milo 5701:AACAAGAGAAGTTATAGAGTTATATTGTTAGAGCTGTTGTAACAGAATATGGCAAGGCC 5760  
bmr-6 5701:AACAAGAGAAGTTATAGAGTTATATTGTTAGAGCTGTTGTAACAGAATATGGCAAGGCC 5760  
\*\*\*\*\*

Figure S4 (page8)

BTx623 5761:GTTAGCAGACTGGTCTTATGGATCACCTTTGGTAGGGACTCCGTGTATGATTAGGAAAC 5820  
Dwarf white milo 5761:GTTAGCAGACTGGTCTTATGGATCACCTTTGGTAGGGACTCCGTGTATGATTAGGAAAC 5820  
Tall white sooner milo 5761:GTTAGCAGACTGGTCTTATGGATCACCTTTGGTAGGGACTCCGTGTATGATTAGGAAAC 5820  
bmr-6 5761:GTTAGCAGACTGGTCTTATGGATCACCTTTGGTAGGGACTCCGTGTATGATTAGGAAAC 5820  
\*\*\*\*\*

BTx623 5821:TCCATTTCCATGAGAATGTTAGCATTGATAGCCATTGCTGCCTTCAGCACCTGTGCAACA 5880  
Dwarf white milo 5821:TCCATTTCCATGAGAATGTTAGCATTGATAGCCATTGCTGCCTTCAGCACCTGTGCAACA 5880  
Tall white sooner milo 5821:TCCATTTCCATGAGAATGTTAGCATTGATAGCCATTGCTGCCTTCAGCACCTGTGCAACA 5880  
bmr-6 5821:TCCATTTCCATGAGAATGTTAGCATTGATAGCCATTGCTGCCTTCAGCACCTGTGCAACA 5880  
\*\*\*\*\*

BTx623 5881:AGTTCCTTCTGGTCTGAAGCCATTTCTGTATGCATCTGAGAGCCATTAGGAGGAAC 5940  
Dwarf white milo 5881:AGTTCCTTCTGGTCTGAAGCCATTTCTGTATGCATCTGAGAGCCATTAGGAGGAAC 5940  
Tall white sooner milo 5881:AGTTCCTTCTGGTCTGAAGCCATTTCTGTATGCATCTGAGAGCCATTAGGAGGAAC 5940  
bmr-6 5881:AGTTCCTTCTGGTCTGAAGCCATTTCTGTATGCATCTGAGAGCCATTAGGAGGAAC 5940  
\*\*\*\*\*

BTx623 5941:CTGACAGTTGGGAGCCACCATTTGTCGTCTGCCTCGGCATGTTCCCTTCCCCGATTCA 6000  
Dwarf white milo 5941:CTGACAGTTGGGAGCCACCATTTGTCGTCTGCCTCGGCATGTTCCCTTCCCCGATTCA 6000  
Tall white sooner milo 5941:CTGACAGTTGGGAGCCACCATTTGTCGTCTGCCTCGGCATGTTCCCTTCCCCGATTCA 6000  
bmr-6 5941:CTGACAGTTGGGAGCCACCATTTGTCGTCTGCCTCGGCATGTTCCCTTCCCCGATTCA 6000  
\*\*\*\*\*

BTx623 6001:TCTGAATCTTCTTACATACCAAACTCCTGCTTACCCTCGAACTGTCAAGGTATTCC 6060  
Dwarf white milo 6001:TCTGAATCTTCTTACATACCAAACTCCTGCTTACCCTCGAACTGTCAAGGTATTCC 6060  
Tall white sooner milo 6001:TCTGAATCTTCTTACATACCAAACTCCTGCTTACCCTCGAACTGTCAAGGTATTCC 6060  
bmr-6 6001:TCTGAATCTTCTTACATACCAAACTCCTGCTTACCCTCGAACTGTCAAGGTATTCC 6060  
\*\*\*\*\*

BTx623 6061:TATTCCACAGGAGACATATGCAATGCCACAAGTTAGAATTTAGATATCCATCCCTCTGA 6120  
Dwarf white milo 6061:TATTCCACAGGAGACATATGCAATGCCACAAGTTAGAATTTAGATATCCATCCCTCTGA 6120  
Tall white sooner milo 6061:TATTCCACAGGAGACATATGCAATGCCACAAGTTAGAATTTAGATATCCATCCCTCTGA 6120  
bmr-6 6061:TATTCCACAGGAGACATATGCAATGCCACAAGTTAGAATTTAGATATCCATCCCTCTGA 6120  
\*\*\*\*\*

BTx623 6121:AGTCTGAAGTTCAGTTCAGTAAATATCAAGATAGAGCATGCCCGTCTTACAAGGAG 6180  
Dwarf white milo 6121:AGTCTGAAGTTCAGTTCAGTAAATATCAAGATAGAGCATGCCCGTCTTACAAGGAG 6180  
Tall white sooner milo 6121:AGTCTGAAGTTCAGTTCAGTAAATATCAAGATAGAGCATGCCCGTCTTACAAGGAG 6180  
bmr-6 6121:AGTCTGAAGTTCAGTTCAGTAAATATCAAGATAGAGCATGCCCGTCTTACAAGGAG 6180  
\*\*\*\*\*

BTx623 6181:CATTGCATCGAGCTTGGCAACGCAGGGATGTTCAATTTAGATCCTGACGCTGCTGAGT 6240  
Dwarf white milo 6181:CATTGCATCGAGCTTGGCAACGCAGGGATGTTCAATTTAGATCCTGACGCTGCTGAGT 6240  
Tall white sooner milo 6181:CATTGCATCGAGCTTGGCAACGCAGGGATGTTCAATTTAGATCCTGACGCTGCTGAGT 6240  
bmr-6 6181:CATTGCATCGAGCTTGGCAACGCAGGGATGTTCAATTTAGATCCTGACGCTGCTGAGT 6240  
\*\*\*\*\*

BTx623 6241:TATCATTATCTGTTGACATGAAAACGCGTCAATTTAAGTTGGTTAACGCAGTGGTGTT 6300  
Dwarf white milo 6241:TATCATTATCTGTTGACATGAAAACGCGTCAATTTAAGTTGGTTAACGCAGTGGTGTT 6300  
Tall white sooner milo 6241:TATCATTATCTGTTGACATGAAAACGCGTCAATTTAAGTTGGTTAACGCAGTGGTGTT 6300  
bmr-6 6241:TATCATTATCTGTTGACATGAAAACGCGTCAATTTAAGTTGGTTAACGCAGTGGTGTT 6300  
\*\*\*\*\*

BTx623 6301:AACGCTGTATTGTTGATAACGAATTGAAATGAAGCTGAATACTTGAATAGTACAGCAA 6360  
Dwarf white milo 6301:AACGCTGTATTGTTGATAACGAATTGAAATGAAGCTGAATACTTGAATAGTACAGCAA 6360  
Tall white sooner milo 6301:AACGCTGTATTGTTGATAACGAATTGAAATGAAGCTGAATACTTGAATAGTACAGCAA 6360  
bmr-6 6301:AACGCTGTATTGTTGATAACGAATTGAAATGAAGCTGAATACTTGAATAGTACAGCAA 6360  
\*\*\*\*\*

BTx623 6361:CAGCAAGTACTGAAATAGGGGGATTTTTTTACCTCCATGCAGTCCCATTCTCGGCAG 6420  
Dwarf white milo 6361:CAGCAAGTACTGAAATAGGGGGATTTTTTTACCTCCATGCAGTCCCATTCTCGGCAG 6420  
Tall white sooner milo 6361:CAGCAAGTACTGAAATAGGGGGATTTTTTTACCTCCATGCAGTCCCATTCTCGGCAG 6420  
bmr-6 6361:CAGCAAGTACTGAAATAGGGGGATTTTTTTACCTCCATGCAGTCCCATTCTCGGCAG 6420  
\*\*\*\*\*

BTx623 6421:CTGCCGGAAGGAACAAATCAACAATGTGATCGGAGACGGACAAAAGCCAGTCGATCTC 6480  
Dwarf white milo 6421:CTGCCGGAAGGAACAAATCAACAATGTGATCGGAGACGGACAAAAGCCAGTCGATCTC 6480  
Tall white sooner milo 6421:CTGCCGGAAGGAACAAATCAACAATGTGATCGGAGACGGACAAAAGCCAGTCGATCTC 6480  
bmr-6 6421:CTGCCGGAAGGAACAAATCAACAATGTGATCGGAGACGGACAAAAGCCAGTCGATCTC 6480  
\*\*\*\*\*

BTx623 6481:CTTCGTCCACCGCATTTCTGGTCGGCGGCCATGGGCTGCAGACGACGCTGCTCACCAA 6540  
Dwarf white milo 6481:CTTCGTCCACCGCATTTCTGGTCGGCGGCCATGGGCTGCAGACGACGCTGCTCACCAA 6540  
Tall white sooner milo 6481:CTTCGTCCACCGCATTTCTGGTCGGCGGCCATGGGCTGCAGACGACGCTGCTCACCAA 6540  
bmr-6 6481:CTTCGTCCACCGCATTTCTGGTCGGCGGCCATGGGCTGCAGACGACGCTGCTCACCAA 6540  
\*\*\*\*\*

BTx623 6541:CACAGAAGCTGAAAAGATGGCATCGCGAGAAAGAACGGGCAGTTGATCAGGGTTTCCACT 6600  
Dwarf white milo 6541:CACAGAAGCTGAAAAGATGGCATCGCGAGAAAGAACGGGCAGTTGATCAGGGTTTCCACT 6600  
Tall white sooner milo 6541:CACAGAAGCTGAAAAGATGGCATCGCGAGAAAGAACGGGCAGTTGATCAGGGTTTCCACT 6600  
bmr-6 6541:CACAGAAGCTGAAAAGATGGCATCGCGAGAAAGAACGGGCAGTTGATCAGGGTTTCCACT 6600  
\*\*\*\*\*

BTx623 6601:AGAAATTGGGCAAAGCTCAAATTGTGGAATTGCAGAAGGAAAAAATGATGTTTAGAAA 6660  
Dwarf white milo 6601:AGAAATTGGGCAAAGCTCAAATTGTGGAATTGCAGAAGGAAAAAATGATGTTTAGAAA 6660  
Tall white sooner milo 6601:AGAAATTGGGCAAAGCTCAAATTGTGGAATTGCAGAAGGAAAAAATGATGTTTAGAAA 6660  
bmr-6 6601:AGAAATTGGGCAAAGCTCAAATTGTGGAATTGCAGAAGGAAAAAATGATGTTTAGAAA 6660  
\*\*\*\*\*

BTx623 6661:AATAAGGAAAGAGAGGATTCTGGTGGGAATAAAAAAGAAAGGGGATTACCTGCAA 6720  
Dwarf white milo 6661:AATAAGGAAAGAGAGGATTCTGGTGGGAATAAAAAAGAAAGGGGATTACCTGCAA 6720  
Tall white sooner milo 6661:AATAAGGAAAGAGAGGATTCTGGTGGGAATAAAAAAGAAAGGGGATTACCTGCAA 6720  
bmr-6 6661:AATAAGGAAAGAGAGGATTCTGGTGGGAATAAAAAAGAAAGGGGATTACCTGCAA 6720  
\*\*\*\*\*

BTx623 6721:GATTAGTGATGGCGTTGGACAGGGCAAGAGCAGAGGTCACCCCTTTGCCGGTGCCGGACA 6780  
Dwarf white milo 6721:GATTAGTGATGGCGTTGGACAGGGCAAGAGCAGAGGTCACCCCTTTGCCGGTGCCGGACA 6780  
Tall white sooner milo 6721:GATTAGTGATGGCGTTGGACAGGGCAAGAGCAGAGGTCACCCCTTTGCCGGTGCCGGACA 6780  
bmr-6 6721:GATTAGTGATGGCGTTGGACAGGGCAAGAGCAGAGGTCACCCCTTTGCCGGTGCCGGACA 6780  
\*\*\*\*\*

BTx623 6781:TGTCCTCCCCAGCAGCAGCTTGAGAACTTCTCCCTCACGATCTCCGCATCTGCAACCC 6840  
Dwarf white milo 6781:TGTCCTCCCCAGCAGCAGCTTGAGAACTTCTCCCTCACGATCTCCGCATCTGCAACCC 6840  
Tall white sooner milo 6781:TGTCCTCCCCAGCAGCAGCTTGAGAACTTCTCCCTCACGATCTCCGCATCTGCAACCC 6840  
bmr-6 6781:TGTCCTCCCCAGCAGCAGCTTGAGAACTTCTCCCTCACGATCTCCGCATCTGCAACCC 6840  
\*\*\*\*\*

BTx623 6841:ACAAACGCGAATCATTCTCCAACAAGATTGCAATTTGCAGCAGCATAACGAGCGTTGGT 6900  
Dwarf white milo 6841:ACAAACGCGAATCATTCTCCAACAAGATTGCAATTTGCAGCAGCATAACGAGCGTTGGT 6900  
Tall white sooner milo 6841:ACAAACGCGAATCATTCTCCAACAAGATTGCAATTTGCAGCAGCATAACGAGCGTTGGT 6900  
bmr-6 6841:ACAAACGCGAATCATTCTCCAACAAGATTGCAATTTGCAGCAGCATAACGAGCGTTGGT 6900  
\*\*\*\*\*

BTx623 6901:TGATGGTCCAAGAACAACCGTCACCTGAGGGCGGGCCCTCGTGCCGACCGGCTTGGGCG 6960  
Dwarf white milo 6901:TGATGGTCCAAGAACAACCGTCACCTGAGGGCGGGCCCTCGTGCCGACCGGCTTGGGCG 6960  
Tall white sooner milo 6901:TGATGGTCCAAGAACAACCGTCACCTGAGGGCGGGCCCTCGTGCCGACCGGCTTGGGCG 6960  
bmr-6 6901:TGATGGTCCAAGAACAACCGTCACCTGAGGGCGGGCCCTCGTGCCGACCGGCTTGGGCG 6960  
\*\*\*\*\*

BTx623 6961:GCACCGCAGCGAGGACGAGCTACCGGCTGCCCTTATCCGAAGGGCCACCGGCCAGCG 7020  
Dwarf white milo 6961:GCACCGCAGCGAGGACGAGCTACCGGCTGCCCTTATCCGAAGGGCCACCGGCCAGCG 7020  
Tall white sooner milo 6961:GCACCGCAGCGAGGACGAGCTACCGGCTGCCCTTATCCGAAGGGCCACCGGCCAGCG 7020  
bmr-6 6961:GCACCGCAGCGAGGACGAGCTACCGGCTGCCCTTATCCGAAGGGCCACCGGCCAGCG 7020  
\*\*\*\*\*

BTx623 7021:GCGGCGGAAGGTCAACGGACAGCGGCTCCCTTGGACCCGACGCTCCTCGACAGCGCC 7080  
Dwarf white milo 7021:GCGGCGGAAGGTCAACGGACAGCGGCTCCCTTGGACCCGACGCTCCTCGACAGCGCC 7080  
Tall white sooner milo 7021:GCGGCGGAAGGTCAACGGACAGCGGCTCCCTTGGACCCGACGCTCCTCGACAGCGCC 7080  
bmr-6 7021:GCGGCGGAAGGTCAACGGACAGCGGCTCCCTTGGACCCGACGCTCCTCGACAGCGCC 7080  
\*\*\*\*\*

BTx623 7081:GCCTGGTGCAAGGCTGCCCCGGCGCGGCGCTGCGACTGCGCTCCATCGAGGAGGCGT 7140  
Dwarf white milo 7081:GCCTGGTGCAAGGCTGCCCCGGCGCGGCGCTGCGACTGCGCTCCATCGAGGAGGCGT 7140  
Tall white sooner milo 7081:GCCTGGTGCAAGGCTGCCCCGGCGCGGCGCTGCGACTGCGCTCCATCGAGGAGGCGT 7140  
bmr-6 7081:GCCTGGTGCAAGGCTGCCCCGGCGCGGCGCTGCGACTGCGCTCCATCGAGGAGGCGT 7140  
\*\*\*\*\*

BTx623 7141:CCGTGCCGCTGAGGCCAGCGAGGCGGCGACGACGACGACGCGCCGACCTCCGGCGCTGA 7200  
Dwarf white milo 7141:CCGTGCCGCTGAGGCCAGCGAGGCGGCGACGACGACGACGCGCCGACCTCCGGCGCTGA 7200  
Tall white sooner milo 7141:CCGTGCCGCTGAGGCCAGCGAGGCGGCGACGACGACGACGCGCCGACCTCCGGCGCTGA 7200  
bmr-6 7141:CCGTGCCGCTGAGGCCAGCGAGGCGGCGACGACGACGACGCGCCGACCTCCGGCGCTGA 7200  
\*\*\*\*\*

Figure S4 (page10)

BTx623 7201:ACGAGAACCTTTCGAGGCCGTGGCCGATCTTCTGGAACGGCCGGCCATCACGAGCGCAT 7260  
Dwarf white milo 7201:ACGAGAACCTTTCGAGGCCGTGGCCGATCTTCTGGAACGGCCGGCCATCACGAGCGCAT 7260  
Tall white sooner milo 7201:ACGAGAACCTTTCGAGGCCGTGGCCGATCTTCTGGAACGGCCGGCCATCACGAGCGCAT 7260  
bmr-6 7201:ACGAGAACCTTTCGAGGCCGTGGCCGATCTTCTGGAACGGCCGGCCATCACGAGCGCAT 7260  
\*\*\*\*\*

BTx623 7261:GGCTGGCACGCGCGCCGCTACGGCATCCGCAATGTCAACGTGGCGCCTTTCTTTCT 7320  
Dwarf white milo 7261:GGCTGGCACGCGCGCCGCTACGGCATCCGCAATGTCAACGTGGCGCCTTTCTTTCT 7320  
Tall white sooner milo 7261:GGCTGGCACGCGCGCCGCTACGGCATCCGCAATGTCAACGTGGCGCCTTTCTTTCT 7320  
bmr-6 7261:GGCTGGCACGCGCGCCGCTACGGCATCCGCAATGTCAACGTGGCGCCTTTCTTTCT 7320  
\*\*\*\*\*

BTx623 7321:TGGCAGAGAGAGAGGGAGGAGCGGTGGGCGCGCGGTGGCTGGCTAGATTTCCGGGACG 7380  
Dwarf white milo 7321:TGGCAGAGAGAGAGGGAGGAGCGGTGGGCGCGCGGTGGCTGGCTAGATTTCCGGGACG 7380  
Tall white sooner milo 7321:TGGCAGAGAGAGAGGGAGGAGCGGTGGGCGCGCGGTGGCTGGCTAGATTTCCGGGACG 7380  
bmr-6 7321:TGGCAGAGAGAGAGGGAGGAGCGGTGGGCGCGCGGTGGCTGGCTAGATTTCCGGGACG 7380  
\*\*\*\*\*

BTx623 7381:CTGTGTATGGGAGGTGAGGAGAGGGAGGGCGGAGGAGGGAAGCACAAGCTCGGGGCGG 7440  
Dwarf white milo 7381:CTGTGTATGGGAGGTGAGGAGAGGGAGGGCGGAGGAGGGAAGCACAAGCTCGGGGCGG 7440  
Tall white sooner milo 7381:CTGTGTATGGGAGGTGAGGAGAGGGAGGGCGGAGGAGGGAAGCACAAGCTCGGGGCGG 7440  
bmr-6 7381:CTGTGTATGGGAGGTGAGGAGAGGGAGGGCGGAGGAGGGAAGCACAAGCTCGGGGCGG 7440  
\*\*\*\*\*

BTx623 7441:GCGTGCATCTGCTGGAAGGCTGCGGTTGCTGTTCTGTTCTGTTCTGGGTGGCAGGCGGAGCA 7500  
Dwarf white milo 7441:GCGTGCATCTGCTGGAAGGCTGCGGTTGCTGTTCTGTTCTGTTCTGGGTGGCAGGCGGAGCA 7500  
Tall white sooner milo 7441:GCGTGCATCTGCTGGAAGGCTGCGGTTGCTGTTCTGTTCTGTTCTGGGTGGCAGGCGGAGCA 7500  
bmr-6 7441:GCGTGCATCTGCTGGAAGGCTGCGGTTGCTGTTCTGTTCTGTTCTGGGTGGCAGGCGGAGCA 7500  
\*\*\*\*\*

BTx623 7501:GAATGTGGTTGGTTTCTCGGCTTTGCTTTGCCCCACGCCAAGCTTGAAAACGGCAGCGT 7560  
Dwarf white milo 7501:GAATGTGGTTGGTTTCTCGGCTTTGCTTTGCCCCACGCCAAGCTTGAAAACGGCAGCGT 7560  
Tall white sooner milo 7501:GAATGTGGTTGGTTTCTCGGCTTTGCTTTGCCCCACGCCAAGCTTGAAAACGGCAGCGT 7560  
bmr-6 7501:GAATGTGGTTGGTTTCTCGGCTTTGCTTTGCCCCACGCCAAGCTTGAAAACGGCAGCGT 7560  
\*\*\*\*\*

BTx623 7561:TCCCGGCATGCAGCGCCAGGCTTTTTATCGTGCGCGCCGCCGACTCCGTGCGGTCCG 7620  
Dwarf white milo 7561:TCCCGGCATGCAGCGCCAGGCTTTTTATCGTGCGCGCCGCCGACTCCGTGCGGTCCG 7620  
Tall white sooner milo 7561:TCCCGGCATGCAGCGCCAGGCTTTTTATCGTGCGCGCCGCCGACTCCGTGCGGTCCG 7620  
bmr-6 7561:TCCCGGCATGCAGCGCCAGGCTTTTTATCGTGCGCGCCGCCGACTCCGTGCGGTCCG 7620  
\*\*\*\*\*

BTx623 7621:GCTGGCTGGCCGCAAAATATAAAGAGCACTGAGCACGGACGCCTTGATAGCACAGCAGG 7680  
Dwarf white milo 7621:GCTGGCTGGCCGCAAAATATAAAGAGCACTGAGCACGGACGCCTTGATAGCACAGCAGG 7680  
Tall white sooner milo 7621:GCTGGCTGGCCGCAAAATATAAAGAGCACTGAGCACGGACGCCTTGATAGCACAGCAGG 7680  
bmr-6 7621:GCTGGCTGGCCGCAAAATATAAAGAGCACTGAGCACGGACGCCTTGATAGCACAGCAGG 7680  
\*\*\*\*\*

BTx623 7681:CGCCACGGCCTGCGAAATCTTCCGCTGCTGTCGATAATGGCAGGAACCGTGCCGTGCA 7740  
Dwarf white milo 7681:CGCCACGGCCTGCGAAATCTTCCGCTGCTGTCGATAATGGCAGGAACCGTGCCGTGCA 7740  
Tall white sooner milo 7681:CGCCACGGCCTGCGAAATCTTCCGCTGCTGTCGATAATGGCAGGAACCGTGCCGTGCA 7740  
bmr-6 7681:CGCCACGGCCTGCGAAATCTTCCGCTGCTGTCGATAATGGCAGGAACCGTGCCGTGCA 7740  
\*\*\*\*\*

BTx623 7741:TGGTGGCGTTGGCCTCTCGTCTGCTTGGCGCTTGGCCAGCTCTTAATCGGTGGATGAGT 7800  
Dwarf white milo 7741:TGGTGGCGTTGGCCTCTCGTCTGCTTGGCGCTTGGCCAGCTCTTAATCGGTGGATGAGT 7800  
Tall white sooner milo 7741:TGGTGGCGTTGGCCTCTCGTCTGCTTGGCGCTTGGCCAGCTCTTAATCGGTGGATGAGT 7800  
bmr-6 7741:TGGTGGCGTTGGCCTCTCGTCTGCTTGGCGCTTGGCCAGCTCTTAATCGGTGGATGAGT 7800  
\*\*\*\*\*

BTx623 7801:ACAAATTCCTCATTGCCGTTACTTTTGCCTTTTGAAGAACGTTAGTTGAAACCATAATAT 7860  
Dwarf white milo 7801:ACAAATTCCTCATTGCCGTTACTTTTGCCTTTTGAAGAACGTTAGTTGAAACCATAATAT 7860  
Tall white sooner milo 7801:ACAAATTCCTCATTGCCGTTACTTTTGCCTTTTGAAGAACGTTAGTTGAAACCATAATAT 7860  
bmr-6 7801:ACAAATTCCTCATTGCCGTTACTTTTGCCTTTTGAAGAACGTTAGTTGAAACCATAATAT 7860  
\*\*\*\*\*

BTx623 7861:AGCAGTAAAAAGAAGCCAAATTCTGTAAGGTCTTGATGGAGTGGATTGAAATGATACTCT 7920  
Dwarf white milo 7861:AGCAGTAAAAAGAAGCCAAATTCTGTAAGGTCTTGATGGAGTGGATTGAAATGATACTCT 7920  
Tall white sooner milo 7861:AGCAGTAAAAAGAAGCCAAATTCTGTAAGGTCTTGATGGAGTGGATTGAAATGATACTCT 7920  
bmr-6 7861:AGCAGTAAAAAGAAGCCAAATTCTGTAAGGTCTTGATGGAGTGGATTGAAATGATACTCT 7920  
\*\*\*\*\*

Figure S4 (page11)

BTx623 7921:AATCTACTTTAACATATATATAAATTAAGATAGATATATACGTATCCAAACAAGACAGTT 7980  
Dwarf white milo 7921:AATCTACTTTAACATATATATAAATTAAGATAGATATATACGTATCCAAACAAGACAGTT 7980  
Tall white sooner milo 7921:AATCTACTTTAACATATATATAAATTAAGATAGATATATACGTATCCAAACAAGACAGTT 7980  
bmr-6 7921:AATCTACTTTAACATATATATAAATTAAGATAGATATATACGTATCCAAACAAGACAGTT 7980  
\*\*\*\*\*

BTx623 7981:TCCTCAACTAGGAGCTGGTAAATTTCAAGGTCGTAAGGAGAGCTCAAATTAGTTGGTTG 8040  
Dwarf white milo 7981:TCCTCAACTAGGAGCTGGTAAATTTCAAGGTCGTAAGGAGAGCTCAAATTAGTTGGTTG 8040  
Tall white sooner milo 7981:TCCTCAACTAGGAGCTGGTAAATTTCAAGGTCGTAAGGAGAGCTCAAATTAGTTGGTTG 8040  
bmr-6 7981:TCCTCAACTAGGAGCTGGTAAATTTCAAGGTCGTAAGGAGAGCTCAAATTAGTTGGTTG 8040  
\*\*\*\*\*

BTx623 8041:GTTGCCGAAAAACTCTGAATCTCTGCCTCGCCACCTTAATTTTTTTAAGTTGCTCCTA 8100  
Dwarf white milo 8041:GTTGCCGAAAAACTCTGAATCTCTGCCTCGCCACCTTAATTTTTTTAAGTTGCTCCTA 8100  
Tall white sooner milo 8041:GTTGCCGAAAAACTCTGAATCTCTGCCTCGCCACCTTAATTTTTTTAAGTTGCTCCTA 8100  
bmr-6 8041:GTTGCCGAAAAACTCTGAATCTCTGCCTCGCCACCTTAATTTTTTTAAGTTGCTCCTA 8100  
\*\*\*\*\*

BTx623 8101:CCGTTCCAAAATAACTAAAGTTTGAGGTTTATTCTAAAATCAAACAATTTACCTTTTGTG 8160  
Dwarf white milo 8101:CCGTTCCAAAATAACTAAAGTTTGAGGTTTATTCTAAAATCAAACAATTTACCTTTTGTG 8160  
Tall white sooner milo 8101:CCGTTCCAAAATAACTAAAGTTTGAGGTTTATTCTAAAATCAAACAATTTACCTTTTGTG 8160  
bmr-6 8101:CCGTTCCAAAATAACTAAAGTTTGAGGTTTATTCTAAAATCAAACAATTTACCTTTTGTG 8160  
\*\*\*\*\*

BTx623 8161:TGCAAAAAACCAATTTACCTTCGATCAAATTAAGAAGACACCATCATTATGGGACT 8220  
Dwarf white milo 8161:TGCAAAAAACCAATTTACCTTCGATCAAATTAAGAAGACACCATCATTATGGGACT 8220  
Tall white sooner milo 8161:TGCAAAAAACCAATTTACCTTCGATCAAATTAAGAAGACACCATCATTATGGGACT 8220  
bmr-6 8161:TGCAAAAAACCAATTTACCTTCGATCAAATTAAGAAGACACCATCATTATGGGACT 8220  
\*\*\*\*\*

BTx623 8221:AAATAGGTGCTGAAGTTTGGTTTATGCTGCTGCTTATGCTAATTTGTGTGAGAAGCATCA 8280  
Dwarf white milo 8221:AAATAGGTGCTGAAGTTTGGTTTATGCTGCTGCTTATGCTAATTTGTGTGAGAAGCATCA 8280  
Tall white sooner milo 8221:AAATAGGTGCTGAAGTTTGGTTTATGCTGCTGCTTATGCTAATTTGTGTGAGAAGCATCA 8280  
bmr-6 8221:AAATAGGTGCTGAAGTTTGGTTTATGCTGCTGCTTATGCTAATTTGTGTGAGAAGCATCA 8280  
\*\*\*\*\*

BTx623 8281:AGAGACGGTGGTTTTGTGCGCAGCACATTCCACTCGTTAATTTAGAATCAAACAATCCAC 8340  
Dwarf white milo 8281:AGAGACGGTGGTTTTGTGCGCAGCACATTCCACTCGTTAATTTAGAATCAAACAATCCAC 8340  
Tall white sooner milo 8281:AGAGACGGTGGTTTTGTGCGCAGCACATTCCACTCGTTAATTTAGAATCAAACAATCCAC 8340  
bmr-6 8281:AGAGACGGTGGTTTTGTGCGCAGCACATTCCACTCGTTAATTTAGAATCAAACAATCCAC 8340  
\*\*\*\*\*

BTx623 8341:TCGTCAATCTCGTGATTTTATTCATGTTCTCGTGCCCTGTCACGGCCAGACAGGTAC 8400  
Dwarf white milo 8341:TCGTCAATCTCGTGATTTTATTCATGTTCTCGTGCCCTGTCACGGCCAGACAGGTAC 8400  
Tall white sooner milo 8341:TCGTCAATCTCGTGATTTTATTCATGTTCTCGTGCCCTGTCACGGCCAGACAGGTAC 8400  
bmr-6 8341:TCGTCAATCTCGTGATTTTATTCATGTTCTCGTGCCCTGTCACGGCCAGACAGGTAC 8400  
\*\*\*\*\*

BTx623 8401:AGCCCGGCAAAATCATGGGACGAGCCAAAAAAAACCTGGGCTAGGCAGGCAGTGCAGGA 8460  
Dwarf white milo 8401:AGCCCGGCAAAATCATGGGACGAGCCAAAAAAAACCTGGGCTAGGCAGGCAGTGCAGGA 8460  
Tall white sooner milo 8401:AGCCCGGCAAAATCATGGGACGAGCCAAAAAAAACCTGGGCTAGGCAGGCAGTGCAGGA 8460  
bmr-6 8401:AGCCCGGCAAAATCATGGGACGAGCCAAAAAAAACCTGGGCTAGGCAGGCAGTGCAGGA 8460  
\*\*\*\*\*

BTx623 8461:GAACTCGAAAAAAGCTGGCCAGACATGTCATCCGTCGCGCCGACCCGTGCTTGAGCCC 8520  
Dwarf white milo 8461:GAACTCGAAAAAAGCTGGCCAGACATGTCATCCGTCGCGCCGACCCGTGCTTGAGCCC 8520  
Tall white sooner milo 8461:GAACTCGAAAAAAGCTGGCCAGACATGTCATCCGTCGCGCCGACCCGTGCTTGAGCCC 8520  
bmr-6 8461:GAACTCGAAAAAAGCTGGCCAGACATGTCATCCGTCGCGCCGACCCGTGCTTGAGCCC 8520  
\*\*\*\*\*

BTx623 8521:AACTCCCGGAACCCGATCTCCAGGTCGCGCGGCGGACGAGCAGCTCGGCCGCTGCGC 8580  
Dwarf white milo 8521:AACTCCCGGAACCCGATCTCCAGGTCGCGCGGCGGACGAGCAGCTCGGCCGCTGCGC 8580  
Tall white sooner milo 8521:AACTCCCGGAACCCGATCTCCAGGTCGCGCGGCGGACGAGCAGCTCGGCCGCTGCGC 8580  
bmr-6 8521:AACTCCCGGAACCCGATCTCCAGGTCGCGCGGCGGACGAGCAGCTCGGCCGCTGCGC 8580  
\*\*\*\*\*

BTx623 8581:GGGCTCCAGTATCTCCACCGCCCGCTTACGGTGCGCAGCCGAGCGCGTCCGCCCTGTC 8640  
Dwarf white milo 8581:GGGCTCCAGTATCTCCACCGCCCGCTTACGGTGCGCAGCCGAGCGCGTCCGCCCTGTC 8640  
Tall white sooner milo 8581:GGGCTCCAGTATCTCCACCGCCCGCTTACGGTGCGCAGCCGAGCGCGTCCGCCCTGTC 8640  
bmr-6 8581:GGGCTCCAGTATCTCCACCGCCCGCTTACGGTGCGCAGCCGAGCGCGTCCGCCCTGTC 8640  
\*\*\*\*\*

Figure S4 (page12)



|                        |                                                                    |      |
|------------------------|--------------------------------------------------------------------|------|
| BTx623                 | 8641: CAGCACGGCCCTGGCCGTGCGCACGAGGCCGGCCACGTCGAGAAGCCCGACCCGTCGCCG | 8700 |
| Dwarf white milo       | 8641: CAGCACGGCCCTGGCCGTGCGCACGAGGCCGGCCACGTCGAGAAGCCCGACCCGTCGCCG | 8700 |
| Tall white sooner milo | 8641: CAGCACGGCCCTGGCCGTGCGCACGAGGCCGGCCACGTCGAGAAGCCCGACCCGTCGCCG | 8700 |
| bmr-6                  | 8641: CAGCACGGCCCTGGCCGTGCGCACGAGGCCGGCCACGTCGAGAAGCCCGACCCGTCGCCG | 8700 |
|                        | *****                                                              |      |
| BTx623                 | 8701: CGACGGAGCGGCCACGACGCCGTGGCCCTCTGCACGAGGCCATCTCCCGCGCGAGCGC   | 8760 |
| Dwarf white milo       | 8701: CGACGGAGCGGCCACGACGCCGTGGCCCTCTGCACGAGGCCATCTCCCGCGCGAGCGC   | 8760 |
| Tall white sooner milo | 8701: CGACGGAGCGGCCACGACGCCGTGGCCCTCTGCACGAGGCCATCTCCCGCGCGAGCGC   | 8760 |
| bmr-6                  | 8701: CGACGGAGCGGCCACGACGCCGTGGCCCTCTGCACGAGGCCATCTCCCGCGCGAGCGC   | 8760 |
|                        | *****                                                              |      |
| BTx623                 | 8761: GTCCTCTCGGCCACCGTGCGGCGCTGCAGGTGTCGACCTGCGCCAGCTGCGCCGGGT    | 8820 |
| Dwarf white milo       | 8761: GTCCTCTCGGCCACCGTGCGGCGCTGCAGGTGTCGACCTGCGCCAGCTGCGCCGGGT    | 8820 |
| Tall white sooner milo | 8761: GTCCTCTCGGCCACCGTGCGGCGCTGCAGGTGTCGACCTGCGCCAGCTGCGCCGGGT    | 8820 |
| bmr-6                  | 8761: GTCCTCTCGGCCACCGTGCGGCGCTGCAGGTGTCGACCTGCGCCAGCTGCGCCGGGT    | 8820 |
|                        | *****                                                              |      |
| BTx623                 | 8821: GAGGTGCGCCAGGTTCCCCGACCGCACGCCGAGGAGGAGTCCGGCAGCTGCGCCTCGAG  | 8880 |
| Dwarf white milo       | 8821: GAGGTGCGCCAGGTTCCCCGACCGCACGCCGAGGAGGAGTCCGGCAGCTGCGCCTCGAG  | 8880 |
| Tall white sooner milo | 8821: GAGGTGCGCCAGGTTCCCCGACCGCACGCCGAGGAGGAGTCCGGCAGCTGCGCCTCGAG  | 8880 |
| bmr-6                  | 8821: GAGGTGCGCCAGGTTCCCCGACCGCACGCCGAGGAGGAGTCCGGCAGCTGCGCCTCGAG  | 8880 |
|                        | *****                                                              |      |
| BTx623                 | 8881: GCGGCGCCGGACTCGGTGTAGAGCAGGTGGACCAGCGTGGTGGGCCGCCACCCGGCGAG  | 8940 |
| Dwarf white milo       | 8881: GCGGCGCCGGACTCGGTGTAGAGCAGGTGGACCAGCGTGGTGGGCCGCCACCCGGCGAG  | 8940 |
| Tall white sooner milo | 8881: GCGGCGCCGGACTCGGTGTAGAGCAGGTGGACCAGCGTGGTGGGCCGCCACCCGGCGAG  | 8940 |
| bmr-6                  | 8881: GCGGCGCCGGACTCGGTGTAGAGCAGGTGGACCAGCGTGGTGGGCCGCCACCCGGCGAG  | 8940 |
|                        | *****                                                              |      |
| BTx623                 | 8941: CCAGTACGCGGCCGCGCTCCCGGGGTGGCCACGGCGCCGACAGCGTCCACACCGG      | 9000 |
| Dwarf white milo       | 8941: CCAGTACGCGGCCGCGCTCCCGGGGTGGCCACGGCGCCGACAGCGTCCACACCGG      | 9000 |
| Tall white sooner milo | 8941: CCAGTACGCGGCCGCGCTCCCGGGGTGGCCACGGCGCCGACAGCGTCCACACCGG      | 9000 |
| bmr-6                  | 8941: CCAGTACGCGGCCGCGCTCCCGGGGTGGCCACGGCGCCGACAGCGTCCACACCGG      | 9000 |
|                        | *****                                                              |      |
| BTx623                 | 9001: GTCAGCCCCGCGCGCCGCCGAGTAGGATTCCAGTGGGCCACGAAGCGCCACAAG       | 9060 |
| Dwarf white milo       | 9001: GTCAGCCCCGCGCGCCGCCGAGTAGGATTCCAGTGGGCCACGAAGCGCCACAAG       | 9060 |
| Tall white sooner milo | 9001: GTCAGCCCCGCGCGCCGCCGAGTAGGATTCCAGTGGGCCACGAAGCGCCACAAG       | 9060 |
| bmr-6                  | 9001: GTCAGCCCCGCGCGCCGCCGAGTAGGATTCCAGTGGGCCACGAAGCGCCACAAG       | 9060 |
|                        | *****                                                              |      |
| BTx623                 | 9061: AGCGGGGAGCTGGGCCGCCGCTCGTCCGACCACGGGCCGACGCCAGGTCGCCGCCAG    | 9120 |
| Dwarf white milo       | 9061: AGCGGGGAGCTGGGCCGCCGCTCGTCCGACCACGGGCCGACGCCAGGTCGCCGCCAG    | 9120 |
| Tall white sooner milo | 9061: AGCGGGGAGCTGGGCCGCCGCTCGTCCGACCACGGGCCGACGCCAGGTCGCCGCCAG    | 9120 |
| bmr-6                  | 9061: AGCGGGGAGCTGGGCCGCCGCTCGTCCGACCACGGGCCGACGCCAGGTCGCCGCCAG    | 9120 |
|                        | *****                                                              |      |
| BTx623                 | 9121: CGAGCGCAGCCCCGGAACACAGAGGTGGAAGCGCCGGTCCGCGCTCAAGCTCCAGCTC   | 9180 |
| Dwarf white milo       | 9121: CGAGCGCAGCCCCGGAACACAGAGGTGGAAGCGCCGGTCCGCGCTCAAGCTCCAGCTC   | 9180 |
| Tall white sooner milo | 9121: CGAGCGCAGCCCCGGAACACAGAGGTGGAAGCGCCGGTCCGCGCTCAAGCTCCAGCTC   | 9180 |
| bmr-6                  | 9121: CGAGCGCAGCCCCGGAACACAGAGGTGGAAGCGCCGGTCCGCGCTCAAGCTCCAGCTC   | 9180 |
|                        | *****                                                              |      |
| BTx623                 | 9181: CATTCCCGCCGCCGCGCACAGGACAGGACAGGACAGGACAGGCGCGCGGGAGGTGTGTC  | 9240 |
| Dwarf white milo       | 9181: CATTCCCGCCGCCGCGCACAGGACAGGACAGGACAGGACAGGCGCGCGGGAGGTGTGTC  | 9240 |
| Tall white sooner milo | 9181: CATTCCCGCCGCCGCGCACAGGACAGGACAGGACAGGACAGGCGCGCGGGAGGTGTGTC  | 9240 |
| bmr-6                  | 9181: CATTCCCGCCGCCGCGCACAGGACAGGACAGGACAGGACAGGCGCGCGGGAGGTGTGTC  | 9240 |
|                        | *****                                                              |      |
| BTx623                 | 9241: AACGACGACGACGACGACGACGACGAAGAAGCGTGGCGGTGGATTATAGGGTGCGGC    | 9300 |
| Dwarf white milo       | 9241: AACGACGACGACGACGACGACGACGAAGAAGCGTGGCGGTGGATTATAGGGTGCGGC    | 9300 |
| Tall white sooner milo | 9241: AACGACGACGACGACGACGACGACGAAGAAGCGTGGCGGTGGATTATAGGGTGCGGC    | 9300 |
| bmr-6                  | 9241: AACGACGACGACGACGACGACGACGAAGAAGCGTGGCGGTGGATTATAGGGTGCGGC    | 9300 |
|                        | *****                                                              |      |
| BTx623                 | 9301: CGTGGAGTGGAGGCGATCGGACGACGACGACGACGCGTGGCGGTGAGCGTATGAGGTGTC | 9360 |
| Dwarf white milo       | 9301: CGTGGAGTGGAGGCGATCGGACGACGACGACGACGCGTGGCGGTGAGCGTATGAGGTGTC | 9360 |
| Tall white sooner milo | 9301: CGTGGAGTGGAGGCGATCGGACGACGACGACGACGCGTGGCGGTGAGCGTATGAGGTGTC | 9360 |
| bmr-6                  | 9301: CGTGGAGTGGAGGCGATCGGACGACGACGACGACGCGTGGCGGTGAGCGTATGAGGTGTC | 9360 |
|                        | *****                                                              |      |

Figure S4 (page13)

BTx623 9361:GCGAGGTGGCGCGCATGCAGGGGGCCATGTGTGCCACGAGCACTGGCCGTGTGGTTCTGG 9420  
Dwarf white milo 9361:GCGAGGTGGCGCGCATGCAGGGGGCCATGTGTGCCACGAGCACTGGCCGTGTGGTTCTGG 9420  
Tall white sooner milo 9361:GCGAGGTGGCGCGCATGCAGGGGGCCATGTGTGCCACGAGCACTGGCCGTGTGGTTCTGG 9420  
bmr-6 9361:GCGAGGTGGCGCGCATGCAGGGGGCCATGTGTGCCACGAGCACTGGCCGTGTGGTTCTGG 9420  
\*\*\*\*\*

BTx623 9421:ACGGCGACGCCGTACGCCGGCGACGCGGGGTGGGCTGGGGTGACATGTGGCCCGAGGT 9480  
Dwarf white milo 9421:ACGGCGACGCCGTACGCCGGCGACGCGGGGTGGGCTGGGGTGACATGTGGCCCGAGGT 9480  
Tall white sooner milo 9421:ACGGCGACGCCGTACGCCGGCGACGCGGGGTGGGCTGGGGTGACATGTGGCCCGAGGT 9480  
bmr-6 9421:ACGGCGACGCCGTACGCCGGCGACGCGGGGTGGGCTGGGGTGACATGTGGCCCGAGGT 9480  
\*\*\*\*\*

BTx623 9481:GCCAATGGGTTTACCGTCTACTGTAGAGGTGTCGCGACGCGCCGACTGGTTGGTCTGGTC 9540  
Dwarf white milo 9481:GCCAATGGGTTTACCGTCTACTGTAGAGGTGTCGCGACGCGCCGACTGGTTGGTCTGGTC 9540  
Tall white sooner milo 9481:GCCAATGGGTTTACCGTCTACTGTAGAGGTGTCGCGACGCGCCGACTGGTTGGTCTGGTC 9540  
bmr-6 9481:GCCAATGGGTTTACCGTCTACTGTAGAGGTGTCGCGACGCGCCGACTGGTTGGTCTGGTC 9540  
\*\*\*\*\*

BTx623 9541:CCAGGGGTACAGTGTGTTTGTGATGACGCGAGGTGACGGTGACGGTGACGGTGACGGAAG 9600  
Dwarf white milo 9541:CCAGGGGTACAGTGTGTTTGTGATGACGCGAGGTGACGGTGACGGTGACGGTGACGGAAG 9600  
Tall white sooner milo 9541:CCAGGGGTACAGTGTGTTTGTGATGACGCGAGGTGACGGTGACGGTGACGGTGACGGAAG 9600  
bmr-6 9541:CCAGGGGTACAGTGTGTTTGTGATGACGCGAGGTGACGGTGACGGTGACGGTGACGGAAG 9600  
\*\*\*\*\*

BTx623 9601:AGCTACTGGTGGCCTTGAGCGCAGAAGTTTGGGCTGTCAATTTTGGGTTGGATCCCATC 9660  
Dwarf white milo 9601:AGCTACTGGTGGCCTTGAGCGCAGAAGTTTGGGCTGTCAATTTTGGGTTGGATCCCATC 9660  
Tall white sooner milo 9601:AGCTACTGGTGGCCTTGAGCGCAGAAGTTTGGGCTGTCAATTTTGGGTTGGATCCCATC 9660  
bmr-6 9601:AGCTACTGGTGGCCTTGAGCGCAGAAGTTTGGGCTGTCAATTTTGGGTTGGATCCCATC 9660  
\*\*\*\*\*

BTx623 9661:GCATCCCATCTGGATGCGCTGCAGATATTTTGCCTGGACGACGGTATTGAATCATGTGTG 9720  
Dwarf white milo 9661:GCATCCCATCTGGATGCGCTGCAGATATTTTGCCTGGACGACGGTATTGAATCATGTGTG 9720  
Tall white sooner milo 9661:GCATCCCATCTGGATGCGCTGCAGATATTTTGCCTGGACGACGGTATTGAATCATGTGTG 9720  
bmr-6 9661:GCATCCCATCTGGATGCGCTGCAGATATTTTGCCTGGACGACGGTATTGAATCATGTGTG 9720  
\*\*\*\*\*

BTx623 9721:TTACTGTTATTGCACAAGCTCAAAAAAAGTGTGTGACTGTTCACTCAGGTTTGTCTGGAA 9780  
Dwarf white milo 9721:TTACTGTTATTGCACAAGCTCAAAAAAAGTGTGTGACTGTTCACTCAGGTTTGTCTGGAA 9780  
Tall white sooner milo 9721:TTACTGTTATTGCACAAGCTCAAAAAAAGTGTGTGACTGTTCACTCAGGTTTGTCTGGAA 9780  
bmr-6 9721:TTACTGTTATTGCACAAGCTCAAAAAAAGTGTGTGACTGTTCACTCAGGTTTGTCTGGAA 9780  
\*\*\*\*\*

BTx623 9781:ACAGGAGAGTCATCTCGGCCTCATCTTGTGTTTATAAATAGTTGGAGCTGTGGATAGTGCTG 9840  
Dwarf white milo 9781:ACAGGAGAGTCATCTCGGCCTCATCTTGTGTTTATAAATAGTTGGAGCTGTGGATAGTGCTG 9840  
Tall white sooner milo 9781:ACAGGAGAGTCATCTCGGCCTCATCTTGTGTTTATAAATAGTTGGAGCTGTGGATAGTGCTG 9840  
bmr-6 9781:ACAGGAGAGTCATCTCGGCCTCATCTTGTGTTTATAAATAGTTGGAGCTGTGGATAGTGCTG 9840  
\*\*\*\*\*

BTx623 9841:TCTGCTAGTGCTGTGCTGTGCTCCCAAGATCAGGTTTCTGAATTTCTACTTTCCGGTAGG 9900  
Dwarf white milo 9841:TCTGCTAGTGCTGTGCTGTGCTCCCAAGATCAGGTTTCTGAATTTCTACTTTCCGGTAGG 9900  
Tall white sooner milo 9841:TCTGCTAGTGCTGTGCTGTGCTCCCAAGATCAGGTTTCTGAATTTCTACTTTCCGGTAGG 9900  
bmr-6 9841:TCTGCTAGTGCTGTGCTGTGCTCCCAAGATCAGGTTTCTGAATTTCTACTTTCCGGTAGG 9900  
\*\*\*\*\*

BTx623 9901:TATCAATAATGGAGGTTTTATTTGCCTGGCTGCCGGCCATGGCGATCGGCCGCGCGTGT 9960  
Dwarf white milo 9901:TATCAATAATGGAGGTTTTATTTGCCTGGCTGCCGGCCATGGCGATCGGCCGCGCGTGT 9960  
Tall white sooner milo 9901:TATCAATAATGGAGGTTTTATTTGCCTGGCTGCCGGCCATGGCGATCGGCCGCGCGTGT 9960  
bmr-6 9901:TATCAATAATGGAGGTTTTATTTGCCTGGCTGCCGGCCATGGCGATCGGCCGCGCGTGT 9960  
\*\*\*\*\*

BTx623 9961:CATTAGTAGAATCTTTGTTTCGCTCCTCGCGTGTCTCGTTCCTGTCCAGGAACCTCAAAA 10020  
Dwarf white milo 9961:CATTAGTAGAATCTTTGTTTCGCTCCTCGCGTGTCTCGTTCCTGTCCAGGAACCTCAAAA 10020  
Tall white sooner milo 9961:CATTAGTAGAATCTTTGTTTCGCTCCTCGCGTGTCTCGTTCCTGTCCAGGAACCTCAAAA 10020  
bmr-6 9961:CATTAGTAGAATCTTTGTTTCGCTCCTCGCGTGTCTCGTTCCTGTCCAGGAACCTCAAAA 10020  
\*\*\*\*\*

BTx623 10021:GCGGAGGATACGTGTATATCTTGCCAGAACCAGCACCTTCAGAGTTTCAGACACATGA 10080  
Dwarf white milo 10021:GCGGAGGATACGTGTATATCTTGCCAGAACCAGCACCTTCAGAGTTTCAGACACATGA 10080  
Tall white sooner milo 10021:GCGGAGGATACGTGTATATCTTGCCAGAACCAGCACCTTCAGAGTTTCAGACACATGA 10080  
bmr-6 10021:GCGGAGGATACGTGTATATCTTGCCAGAACCAGCACCTTCAGAGTTTCAGACACATGA 10080  
\*\*\*\*\*

Figure S4 (page14)

BTx623 10081:TGGTGAATGCAACGGGTGGTAGAAATCGTCGGTTCACGAGGATTACTAGTACTATTCT 10140  
Dwarf white milo 10081:TGGTGAATGCAACGGGTGGTAGAAATCGTCGGTTCACGAGGATTACTAGTACTATTCT 10140  
Tall white sooner milo 10081:TGGTGAATGCAACGGGTGGTAGAAATCGTCGGTTCACGAGGATTACTAGTACTATTCT 10140  
bmr-6 10081:TGGTGAATGCAACGGGTGGTAGAAATCGTCGGTTCACGAGGATTACTAGTACTATTCT 10140  
\*\*\*\*\*

BTx623 10141:GCAGTTTCACATTTACAGCAGGAGATATATATATATATATGTCAGTTGTCAGTTACGTTG 10200  
Dwarf white milo 10141:GCAGTTTCACATTTACAGCAGGAGATATATATATATATGTCAGTTGTCAGTTACGTTG 10200  
Tall white sooner milo 10141:GCAGTTTCACATTTACAGCAGGAGATATATATATATATGTCAGTTGTCAGTTACGTTG 10200  
bmr-6 10141:GCAGTTTCACATTTACAGCAGGAGATATATATATATATGTCAGTTGTCAGTTACGTTG 10200  
\*\*\*\*\*

BTx623 10201:ACGATGCTGGCGATGCACAAAGTTGCATAGCAGCAGTATGCACAGCGACACAGCCTGC 10260  
Dwarf white milo 10201:ACGATGCTGGCGATGCACAAAGTTGCATAGCAGCAGTATGCACAGCGACACAGCCTGC 10260  
Tall white sooner milo 10201:ACGATGCTGGCGATGCACAAAGTTGCATAGCAGCAGTATGCACAGCGACACAGCCTGC 10260  
bmr-6 10201:ACGATGCTGGCGATGCACAAAGTTGCATAGCAGCAGTATGCACAGCGACACAGCCTGC 10260  
\*\*\*\*\*

BTx623 10261:AGGGGCATCCCCTTTGCCAAGTTAGCTTCCCTCCGCGGTCGAAAGCACCTCCAGCTCGG 10320  
Dwarf white milo 10261:AGGGGCATCCCCTTTGCCAAGTTAGCTTCCCTCCGCGGTCGAAAGCACCTCCAGCTCGG 10320  
Tall white sooner milo 10261:AGGGGCATCCCCTTTGCCAAGTTAGCTTCCCTCCGCGGTCGAAAGCACCTCCAGCTCGG 10320  
bmr-6 10261:AGGGGCATCCCCTTTGCCAAGTTAGCTTCCCTCCGCGGTCGAAAGCACCTCCAGCTCGG 10320  
\*\*\*\*\*

BTx623 10321:CCCACCAGAGCGGAGACAGCCTCGGCGTCGACGACCGGCGAGATACCGATGGCTTCTC 10380  
Dwarf white milo 10321:CCCACCAGAGCGGAGACAGCCTCGGCGTCGACGACCGGCGAGATACCGATGGCTTCTC 10380  
Tall white sooner milo 10321:CCCACCAGAGCGGAGACAGCCTCGGCGTCGACGACCGGCGAGATACCGATGGCTTCTC 10380  
bmr-6 10321:CCCACCAGAGCGGAGACAGCCTCGGCGTCGACGACCGGCGAGATACCGATGGCTTCTC 10380  
\*\*\*\*\*

BTx623 10381:TCAGCCTGGCAGCGACCTCCCTCATGCTCGGTCTGTTTCTGGGATCGCTCTGGATGCAGG 10440  
Dwarf white milo 10381:TCAGCCTGGCAGCGACCTCCCTCATGCTCGGTCTGTTTCTGGGATCGCTCTGGATGCAGG 10440  
Tall white sooner milo 10381:TCAGCCTGGCAGCGACCTCCCTCATGCTCGGTCTGTTTCTGGGATCGCTCTGGATGCAGG 10440  
bmr-6 10381:TCAGCCTGGCAGCGACCTCCCTCATGCTCGGTCTGTTTCTGGGATCGCTCTGGATGCAGG 10440  
\*\*\*\*\*

BTx623 10441:CACGGATCACCTCGCCGATGACTGCTAGCTCATCTTCCCTGTGAATGTGATCGCACAGTG 10500  
Dwarf white milo 10441:CACGGATCACCTCGCCGATGACTGCTAGCTCATCTTCCCTGTGAATGTGATCGCACAGTG 10500  
Tall white sooner milo 10441:CACGGATCACCTCGCCGATGACTGCTAGCTCATCTTCCCTGTGAATGTGATCGCACAGTG 10500  
bmr-6 10441:CACGGATCACCTCGCCGATGACTGCTAGCTCATCTTCCCTGTGAATGTGATCGCACAGTG 10500  
\*\*\*\*\*

BTx623 10501:TTGGATCCAGCAAGGAGGCTATACTCCGGTCATCGTTGGCTATGCACTCCAGAGCCTAGG 10560  
Dwarf white milo 10501:TTGGATCCAGCAAGGAGGCTATACTCCGGTCATCGTTGGCTATGCACTCCAGAGCCTAGG 10560  
Tall white sooner milo 10501:TTGGATCCAGCAAGGAGGCTATACTCCGGTCATCGTTGGCTATGCACTCCAGAGCCTAGG 10560  
bmr-6 10501:TTGGATCCAGCAAGGAGGCTATACTCCGGTCATCGTTGGCTATGCACTCCAGAGCCTAGG 10560  
\*\*\*\*\*

BTx623 10561:AAAGAAGAAGAAATACAACGTCACTATTGATTTTTTTTTCATCATCAATCAAGTAGAAA 10620  
Dwarf white milo 10561:AAAGAAGAAGAAATACAACGTCACTATTGATTTTTTTTTCATCATCAATCAAGTAGAAA 10620  
Tall white sooner milo 10561:AAAGAAGAAGAAATACAACGTCACTATTGATTTTTTTTTCATCATCAATCAAGTAGAAA 10620  
bmr-6 10561:AAAGAAGAAGAAATACAACGTCACTATTGATTTTTTTTTCATCATCAATCAAGTAGAAA 10620  
\*\*\*\*\*

BTx623 10621:TGATGTTTCATCGATAGCGTCGTCATTACCGAGCTCACGAGGGAGCGCTCGTGCCGGGG 10680  
Dwarf white milo 10621:TGATGTTTCATCGATAGCGTCGTCATTACCGAGCTCACGAGGGAGCGCTCGTGCCGGGG 10680  
Tall white sooner milo 10621:TGATGTTTCATCGATAGCGTCGTCATTACCGAGCTCACGAGGGAGCGCTCGTGCCGGGG 10680  
bmr-6 10621:TGATGTTTCATCGATAGCGTCGTCATTACCGAGCTCACGAGGGAGCGCTCGTGCCGGGG 10680  
\*\*\*\*\*

BTx623 10681:TATGGAATGGAAGTTTCCCTGAGATGATTTCAAGCAGTAGAACACCGAAGCTATGTACA 10740  
Dwarf white milo 10681:TATGGAATGGAAGTTTCCCTGAGATGATTTCAAGCAGTAGAACACCGAAGCTATGTACA 10740  
Tall white sooner milo 10681:TATGGAATGGAAGTTTCCCTGAGATGATTTCAAGCAGTAGAACACCGAAGCTATGTACA 10740  
bmr-6 10681:TATGGAATGGAAGTTTCCCTGAGATGATTTCAAGCAGTAGAACACCGAAGCTATGTACA 10740  
\*\*\*\*\*

BTx623 10741:TTCCCTGCTAACCCAGCGGACACCTGTTCTTGGTGATGGTCGAGCTCGCCATTCTGTCGCC 10800  
Dwarf white milo 10741:TTCCCTGCTAACCCAGCGGACACCTGTTCTTGGTGATGGTCGAGCTCGCCATTCTGTCGCC 10800  
Tall white sooner milo 10741:TTCCCTGCTAACCCAGCGGACACCTGTTCTTGGTGATGGTCGAGCTCGCCATTCTGTCGCC 10800  
bmr-6 10741:TTCCCTGCTAACCCAGCGGACACCTGTTCTTGGTGATGGTCGAGCTCGCCATTCTGTCGCC 10800  
\*\*\*\*\*

Figure S4 (page15)

BTx623 10801:GTTTTGGCTTCAGAAATCACTTCATGCCAAACGCTCATGTCCGCTATCTGCAGGAACAAC 10860  
Dwarf white milo 10801:GTTTTGGCTTCAGAAATCACTTCATGCCAAACGCTCATGTCCGCTATCTGCAGGAACAAC 10860  
Tall white sooner milo 10801:GTTTTGGCTTCAGAAATCACTTCATGCCAAACGCTCATGTCCGCTATCTGCAGGAACAAC 10860  
bmr-6 10801:GTTTTGGCTTCAGAAATCACTTCATGCCAAACGCTCATGTCCGCTATCTGCAGGAACAAC 10860  
\*\*\*\*\*

BTx623 10861:TCAGGTCTCAGGGTGGATCAAGTTGCAGTTCCTTCACACTGATGCTAACACAGCATGGTT 10920  
Dwarf white milo 10861:TCAGGTCTCAGGGTGGATCAAGTTGCAGTTCCTTCACACTGATGCTAACACAGCATGGTT 10920  
Tall white sooner milo 10861:TCAGGTCTCAGGGTGGATCAAGTTGCAGTTCCTTCACACTGATGCTAACACAGCATGGTT 10920  
bmr-6 10861:TCAGGTCTCAGGGTGGATCAAGTTGCAGTTCCTTCACACTGATGCTAACACAGCATGGTT 10920  
\*\*\*\*\*

BTx623 10921:GTTGACACCAAGAGGTTTCAAATTTGGTAAACTCAGGGAGTGATAATATGAAGTTGGG 10980  
Dwarf white milo 10921:GTTGACACCAAGAGGTTTCAAATTTGGTAAACTCAGGGAGTGATAATATGAAGTTGGG 10980  
Tall white sooner milo 10921:GTTGACACCAAGAGGTTTCAAATTTGGTAAACTCAGGGAGTGATAATATGAAGTTGGG 10980  
bmr-6 10921:GTTGACACCAAGAGGTTTCAAATTTGGTAAACTCAGGGAGTGATAATATGAAGTTGGG 10980  
\*\*\*\*\*

BTx623 10981:TAGGACAAACAAAAGAAAAGAAAACATTAACCAAGACTAGCTTATAGCCTTATGGAAGT 11040  
Dwarf white milo 10981:TAGGACAAACAAAAGAAAAGAAAACATTAACCAAGACTAGCTTATAGCCTTATGGAAGT 11040  
Tall white sooner milo 10981:TAGGACAAACAAAAGAAAAGAAAACATTAACCAAGACTAGCTTATAGCCTTATGGAAGT 11040  
bmr-6 10981:TAGGACAAACAAAAGAAAAGAAAACATTAACCAAGACTAGCTTATAGCCTTATGGAAGT 11040  
\*\*\*\*\*

BTx623 11041:GGATGGGAGTGTGTACCTTTGCAGCACCATCTTCAGATAGCAGTATGGAAGTGGACTGAA 11100  
Dwarf white milo 11041:GGATGGGAGTGTGTACCTTTGCAGCACCATCTTCAGATAGCAGTATGGAAGTGGACTGAA 11100  
Tall white sooner milo 11041:GGATGGGAGTGTGTACCTTTGCAGCACCATCTTCAGATAGCAGTATGGAAGTGGACTGAA 11100  
bmr-6 11041:GGATGGGAGTGTGTACCTTTGCAGCACCATCTTCAGATAGCAGTATGGAAGTGGACTGAA 11100  
\*\*\*\*\*

BTx623 11101:GATCAGGGTGCACCACAGGAGGGCTGAGCTCATGCATGTGCTGGATGCAGTATGCTAGTC 11160  
Dwarf white milo 11101:GATCAGGGTGCACCACAGGAGGGCTGAGCTCATGCATGTGCTGGATGCAGTATGCTAGTC 11160  
Tall white sooner milo 11101:GATCAGGGTGCACCACAGGAGGGCTGAGCTCATGCATGTGCTGGATGCAGTATGCTAGTC 11160  
bmr-6 11101:GATCAGGGTGCACCACAGGAGGGCTGAGCTCATGCATGTGCTGGATGCAGTATGCTAGTC 11160  
\*\*\*\*\*

BTx623 11161:CCATGATAATCCGCATCCTACCTCGCCAAGCGATGTGCTCAAATCCTCAGCTGCAACAA 11220  
Dwarf white milo 11161:CCATGATAATCCGCATCCTACCTCGCCAAGCGATGTGCTCAAATCCTCAGCTGCAACAA 11220  
Tall white sooner milo 11161:CCATGATAATCCGCATCCTACCTCGCCAAGCGATGTGCTCAAATCCTCAGCTGCAACAA 11220  
bmr-6 11161:CCATGATAATCCGCATCCTACCTCGCCAAGCGATGTGCTCAAATCCTCAGCTGCAACAA 11220  
\*\*\*\*\*

BTx623 11221:GTTTGCAGAATTGTTAATTACTCGTACACAATATTTACAGAGCTACATGTACAGTTCAAT 11280  
Dwarf white milo 11221:GTTTGCAGAATTGTTAATTACTCGTACACAATATTTACAGAGCTACATGTACAGTTCAAT 11280  
Tall white sooner milo 11221:GTTTGCAGAATTGTTAATTACTCGTACACAATATTTACAGAGCTACATGTACAGTTCAAT 11280  
bmr-6 11221:GTTTGCAGAATTGTTAATTACTCGTACACAATATTTACAGAGCTACATGTACAGTTCAAT 11280  
\*\*\*\*\*

BTx623 11281:GGTATGGTTGAATTAGCAAGAACAGTTTCTATATACCATGAAGACTCTCATGAAGTGTC 11340  
Dwarf white milo 11281:GGTATGGTTGAATTAGCAAGAACAGTTTCTATATACCATGAAGACTCTCATGAAGTGTC 11340  
Tall white sooner milo 11281:GGTATGGTTGAATTAGCAAGAACAGTTTCTATATACCATGAAGACTCTCATGAAGTGTC 11340  
bmr-6 11281:GGTATGGTTGAATTAGCAAGAACAGTTTCTATATACCATGAAGACTCTCATGAAGTGTC 11340  
\*\*\*\*\*

BTx623 11341:CATTGCGCGCTACTCGAGCACCATCATCCTGGTGAAGGTTCTCCTCCTCACAGAAGC 11400  
Dwarf white milo 11341:CATTGCGCGCTACTCGAGCACCATCATCCTGGTGAAGGTTCTCCTCCTCACAGAAGC 11400  
Tall white sooner milo 11341:CATTGCGCGCTACTCGAGCACCATCATCCTGGTGAAGGTTCTCCTCCTCACAGAAGC 11400  
bmr-6 11341:CATTGCGCGCTACTCGAGCACCATCATCCTGGTGAAGGTTCTCCTCCTCACAGAAGC 11400  
\*\*\*\*\*

BTx623 11401:CAAGCAGATTGATGAAGTTCCTGTGGTTTATTCGCGACAGGGTGTCTATCTGCTCAATTC 11460  
Dwarf white milo 11401:CAAGCAGATTGATGAAGTTCCTGTGGTTTATTCGCGACAGGGTGTCTATCTGCTCAATTC 11460  
Tall white sooner milo 11401:CAAGCAGATTGATGAAGTTCCTGTGGTTTATTCGCGACAGGGTGTCTATCTGCTCAATTC 11460  
bmr-6 11401:CAAGCAGATTGATGAAGTTCCTGTGGTTTATTCGCGACAGGGTGTCTATCTGCTCAATTC 11460  
\*\*\*\*\*

BTx623 11461:ATCATTAAAGTAATTCAGCTAATATGCAAATACACAACTCAAATGGGTGTGTTGTTCA 11520  
Dwarf white milo 11461:ATCATTAAAGTAATTCAGCTAATATGCAAATACACAACTCAAATGGGTGTGTTGTTCA 11520  
Tall white sooner milo 11461:ATCATTAAAGTAATTCAGCTAATATGCAAATACACAACTCAAATGGGTGTGTTGTTCA 11520  
bmr-6 11461:ATCATTAAAGTAATTCAGCTAATATGCAAATACACAACTCAAATGGGTGTGTTGTTCA 11520  
\*\*\*\*\*

Figure S4 (page16)

BTx623 11521:CATATATCTAAATAAATGGGCCAAATTTCTGATGATAACCTTTCTCCTGAAGCAGGTCTCT 11580  
Dwarf white milo 11521:CATATATCTAAATAAATGGGCCAAATTTCTGATGATAACCTTTCTCCTGAAGCAGGTCTCT 11580  
Tall white sooner milo 11521:CATATATCTAAATAAATGGGCCAAATTTCTGATGATAACCTTTCTCCTGAAGCAGGTCTCT 11580  
bmr-6 11521:CATATATCTAAATAAATGGGCCAAATTTCTGATGATAACCTTTCTCCTGAAGCAGGTCTCT 11580  
\*\*\*\*\*

BTx623 11581:GAATGCTCTGACCACTCCTTGCTCGATGTAATCATAGTGGACACCACGGCGATCTCAACC 11640  
Dwarf white milo 11581:GAATGCTCTGACCACTCCTTGCTCGATGTAATCATAGTGGACACCACGGCGATCTCAACC 11640  
Tall white sooner milo 11581:GAATGCTCTGACCACTCCTTGCTCGATGTAATCATAGTGGACACCACGGCGATCTCAACC 11640  
bmr-6 11581:GAATGCTCTGACCACTCCTTGCTCGATGTAATCATAGTGGACACCACGGCGATCTCAACC 11640  
\*\*\*\*\*

BTx623 11641:CCAGTTGACAAAGTTCCCTTGTAGACGGTGTAGTGTGGTAGTCGCCACGATGTTACTG 11700  
Dwarf white milo 11641:CCAGTTGACAAAGTTCCCTTGTAGACGGTGTAGTGTGGTAGTCGCCACGATGTTACTG 11700  
Tall white sooner milo 11641:CCAGTTGACAAAGTTCCCTTGTAGACGGTGTAGTGTGGTAGTCGCCACGATGTTACTG 11700  
bmr-6 11641:CCAGTTGACAAAGTTCCCTTGTAGACGGTGTAGTGTGGTAGTCGCCACGATGTTACTG 11700  
\*\*\*\*\*

BTx623 11701:AAGTCCTCACAGGCACGTTCCAGCTCTGAACGCTGCAACTTTGGTACTCCTGATGAAGCA 11760  
Dwarf white milo 11701:AAGTCCTCACAGGCACGTTCCAGCTCTGAACGCTGCAACTTTGGTACTCCTGATGAAGCA 11760  
Tall white sooner milo 11701:AAGTCCTCACAGGCACGTTCCAGCTCTGAACGCTGCAACTTTGGTACTCCTGATGAAGCA 11760  
bmr-6 11701:AAGTCCTCACAGGCACGTTCCAGCTCTGAACGCTGCAACTTTGGTACTCCTGATGAAGCA 11760  
\*\*\*\*\*

BTx623 11761:ATGAGAATCAGCTGGGTTAATTGCAACAAGCAGCAGCTTAAGTTGACTAGATATCTGAA 11820  
Dwarf white milo 11761:ATGAGAATCAGCTGGGTTAATTGCAACAAGCAGCAGCTTAAGTTGACTAGATATCTGAA 11820  
Tall white sooner milo 11761:ATGAGAATCAGCTGGGTTAATTGCAACAAGCAGCAGCTTAAGTTGACTAGATATCTGAA 11820  
bmr-6 11761:ATGAGAATCAGCTGGGTTAATTGCAACAAGCAGCAGCTTAAGTTGACTAGATATCTGAA 11820  
\*\*\*\*\*

BTx623 11821:CAATTCAGACAGCAAAGTATCAACTGAATCTTCCATCCTATTTTTTTTCCCTTGCAAGTA 11880  
Dwarf white milo 11821:CAATTCAGACAGCAAAGTATCAACTGAATCTTCCATCCTATTTTTTTTCCCTTGCAAGTA 11880  
Tall white sooner milo 11821:CAATTCAGACAGCAAAGTATCAACTGAATCTTCCATCCTATTTTTTTTCCCTTGCAAGTA 11880  
bmr-6 11821:CAATTCAGACAGCAAAGTATCAACTGAATCTTCCATCCTATTTTTTTTCCCTTGCAAGTA 11880  
\*\*\*\*\*

BTx623 11881:GTACAGATTTTTTTTAAAAAAAAGGGGGGATGTAATAAATTTTGAGCACATATATGAAG 11940  
Dwarf white milo 11881:GTACAGATTTTTTTTAAAAAAAAGGGGGGATGTAATAAATTTTGAGCACATATATGAAG 11940  
Tall white sooner milo 11881:GTACAGATTTTTTTTAAAAAAAAGGGGGGATGTAATAAATTTTGAGCACATATATGAAG 11940  
bmr-6 11881:GTACAGATTTTTTTTAAAAAAAAGGGGGGATGTAATAAATTTTGAGCACATATATGAAG 11940  
\*\*\*\*\*

BTx623 11941:GAACTAGTAGCAAATATAGTACTCCATACAATAGCAGTATGTATACCTGTAGCAAAGGC 12000  
Dwarf white milo 11941:GAACTAGTAGCAAATATAGTACTCCATACAATAGCAGTATGTATACCTGTAGCAAAGGC 12000  
Tall white sooner milo 11941:GAACTAGTAGCAAATATAGTACTCCATACAATAGCAGTATGTATACCTGTAGCAAAGGC 12000  
bmr-6 11941:GAACTAGTAGCAAATATAGTACTCCATACAATAGCAGTATGTATACCTGTAGCAAAGGC 12000  
\*\*\*\*\*

BTx623 12001:TTTCTGCAGCTGGCCACTGAGTCCAGTCTTCCAAGGGCCAATGGTCGCAACCCGACTCTT 12060  
Dwarf white milo 12001:TTTCTGCAGCTGGCCACTGAGTCCAGTCTTCCAAGGGCCAATGGTCGCAACCCGACTCTT 12060  
Tall white sooner milo 12001:TTTCTGCAGCTGGCCACTGAGTCCAGTCTTCCAAGGGCCAATGGTCGCAACCCGACTCTT 12060  
bmr-6 12001:TTTCTGCAGCTGGCCACTGAGTCCAGTCTTCCAAGGGCCAATGGTCGCAACCCGACTCTT 12060  
\*\*\*\*\*

BTx623 12061:ACGACAAGAAGCCAGCACGCTAGTCCAGCAAGCAACAGCAGGGCAAGCGCCGGAAGAAC 12120  
Dwarf white milo 12061:ACGACAAGAAGCCAGCACGCTAGTCCAGCAAGCAACAGCAGGGCAAGCGCCGGAAGAAC 12120  
Tall white sooner milo 12061:ACGACAAGAAGCCAGCACGCTAGTCCAGCAAGCAACAGCAGGGCAAGCGCCGGAAGAAC 12120  
bmr-6 12061:ACGACAAGAAGCCAGCACGCTAGTCCAGCAAGCAACAGCAGGGCAAGCGCCGGAAGAAC 12120  
\*\*\*\*\*

BTx623 12121:AACCATGTAGAGCCACCTCATAGATCTCGACAATAAGCCGCCGGCGTCTGGTGCCGC 12180  
Dwarf white milo 12121:AACCATGTAGAGCCACCTCATAGATCTCGACAATAAGCCGCCGGCGTCTGGTGCCGC 12180  
Tall white sooner milo 12121:AACCATGTAGAGCCACCTCATAGATCTCGACAATAAGCCGCCGGCGTCTGGTGCCGC 12180  
bmr-6 12121:AACCATGTAGAGCCACCTCATAGATCTCGACAATAAGCCGCCGGCGTCTGGTGCCGC 12180  
\*\*\*\*\*

BTx623 12181:CTCGCTCGGATCGTTCTGCCCCCGTGTGCGACTGGGAGACGCCGCCGAAAAGACCGGT 12240  
Dwarf white milo 12181:CTCGCTCGGATCGTTCTGCCCCCGTGTGCGACTGGGAGACGCCGCCGAAAAGACCGGT 12240  
Tall white sooner milo 12181:CTCGCTCGGATCGTTCTGCCCCCGTGTGCGACTGGGAGACGCCGCCGAAAAGACCGGT 12240  
bmr-6 12181:CTCGCTCGGATCGTTCTGCCCCCGTGTGCGACTGGGAGACGCCGCCGAAAAGACCGGT 12240  
\*\*\*\*\*

Figure S4 (page17)

BTx623 12241:TCCATGAGACGGGACATGAGCGTCTGACTGGGACGCCATGAACGTTCCGAGGCAGAGGCAG 12300  
Dwarf white milo 12241:TCCATGAGACGGGACATGAGCGTCTGACTGGGACGCCATGAACGTTCCGAGGCAGAGGCAG 12300  
Tall white sooner milo 12241:TCCATGAGACGGGACATGAGCGTCTGACTGGGACGCCATGAACGTTCCGAGGCAGAGGCAG 12300  
bmr-6 12241:TCCATGAGACGGGACATGAGCGTCTGACTGGGACGCCATGAACGTTCCGAGGCAGAGGCAG 12300  
\*\*\*\*\*

BTx623 12301:CGCGGCAGATTTGTGGTGTCTGCTGAAGTAGTAGCCTCCGATGGCTCGGCTGCGCCG 12360  
Dwarf white milo 12301:CGCGGCAGATTTGTGGTGTCTGCTGAAGTAGTAGCCTCCGATGGCTCGGCTGCGCCG 12360  
Tall white sooner milo 12301:CGCGGCAGATTTGTGGTGTCTGCTGAAGTAGTAGCCTCCGATGGCTCGGCTGCGCCG 12360  
bmr-6 12301:CGCGGCAGATTTGTGGTGTCTGCTGAAGTAGTAGCCTCCGATGGCTCGGCTGCGCCG 12360  
\*\*\*\*\*

BTx623 12361:CGGCAGATCCGCGGCGGTATGGCAGAATGGAGGGTCAACATGACCAGCAGGGAAGT 12420  
Dwarf white milo 12361:CGGCAGATCCGCGGCGGTATGGCAGAATGGAGGGTCAACATGACCAGCAGGGAAGT 12420  
Tall white sooner milo 12361:CGGCAGATCCGCGGCGGTATGGCAGAATGGAGGGTCAACATGACCAGCAGGGAAGT 12420  
bmr-6 12361:CGGCAGATCCGCGGCGGTATGGCAGAATGGAGGGTCAACATGACCAGCAGGGAAGT 12420  
\*\*\*\*\*

BTx623 12421:CGACGCTCCATCGTTCGTCGGCGTGCCCAAAGATCGGTCGCATCAGATGAGCAGATAGC 12480  
Dwarf white milo 12421:CGACGCTCCATCGTTCGTCGGCGTGCCCAAAGATCGGTCGCATCAGATGAGCAGATAGC 12480  
Tall white sooner milo 12421:CGACGCTCCATCGTTCGTCGGCGTGCCCAAAGATCGGTCGCATCAGATGAGCAGATAGC 12480  
bmr-6 12421:CGACGCTCCATCGTTCGTCGGCGTGCCCAAAGATCGGTCGCATCAGATGAGCAGATAGC 12480  
\*\*\*\*\*

BTx623 12481:CTCTACGCGCTGCGTGCCCTCCCTGAGAAAAAAAAGGGATATGGCAGAATCATCGGCG 12540  
Dwarf white milo 12481:CTCTACGCGCTGCGTGCCCTCCCTGAGAAAAAAAAGGGATATGGCAGAATCATCGGCG 12540  
Tall white sooner milo 12481:CTCTACGCGCTGCGTGCCCTCCCTGAGAAAAAAAAGGGATATGGCAGAATCATCGGCG 12540  
bmr-6 12481:CTCTACGCGCTGCGTGCCCTCCCTGAGAAAAAAAAGGGATATGGCAGAATCATCGGCG 12540  
\*\*\*\*\*

BTx623 12541:TCGTCAGGGCTGCATGTTTTGAAGCATTAGAGATACTAGTAGAACACTGGATAAAAAAAG 12600  
Dwarf white milo 12541:TCGTCAGGGCTGCATGTTTTGAAGCATTAGAGATACTAGTAGAACACTGGATAAAAAAAG 12600  
Tall white sooner milo 12541:TCGTCAGGGCTGCATGTTTTGAAGCATTAGAGATACTAGTAGAACACTGGATAAAAAAAG 12600  
bmr-6 12541:TCGTCAGGGCTGCATGTTTTGAAGCATTAGAGATACTAGTAGAACACTGGATAAAAAAAG 12600  
\*\*\*\*\*

BTx623 12601:AGGTGTTGGGAAATTCAGAGTTTCAGACAGCTCCATGATTGATCGCATCGCGTCACCGAC 12660  
Dwarf white milo 12601:AGGTGTTGGGAAATTCAGAGTTTCAGACAGCTCCATGATTGATCGCATCGCGTCACCGAC 12660  
Tall white sooner milo 12601:AGGTGTTGGGAAATTCAGAGTTTCAGACAGCTCCATGATTGATCGCATCGCGTCACCGAC 12660  
bmr-6 12601:AGGTGTTGGGAAATTCAGAGTTTCAGACAGCTCCATGATTGATCGCATCGCGTCACCGAC 12660  
\*\*\*\*\*

BTx623 12661:GACAACCTGATCGAAGAACATGATTGATGAGAGGAAGCAGGGTAGATTGAGAGCTTACAG 12720  
Dwarf white milo 12661:GACAACCTGATCGAAGAACATGATTGATGAGAGGAAGCAGGGTAGATTGAGAGCTTACAG 12720  
Tall white sooner milo 12661:GACAACCTGATCGAAGAACATGATTGATGAGAGGAAGCAGGGTAGATTGAGAGCTTACAG 12720  
bmr-6 12661:GACAACCTGATCGAAGAACATGATTGATGAGAGGAAGCAGGGTAGATTGAGAGCTTACAG 12720  
\*\*\*\*\*

BTx623 12721:TGTGAACGAAACGAAGAGGAAGACGATGACGAGGGAAGGGTCGGAGTTGCTTCGTGGCGG 12780  
Dwarf white milo 12721:TGTGAACGAAACGAAGAGGAAGACGATGACGAGGGAAGGGTCGGAGTTGCTTCGTGGCGG 12780  
Tall white sooner milo 12721:TGTGAACGAAACGAAGAGGAAGACGATGACGAGGGAAGGGTCGGAGTTGCTTCGTGGCGG 12780  
bmr-6 12721:TGTGAACGAAACGAAGAGGAAGACGATGACGAGGGAAGGGTCGGAGTTGCTTCGTGGCGG 12780  
\*\*\*\*\*

BTx623 12781:TAGTAGTTGGAGGAGCCAATAACACACACTTTTCTTTGTTACCACTGACAAGAAAAAAT 12840  
Dwarf white milo 12781:TAGTAGTTGGAGGAGCCAATAACACACACTTTTCTTTGTTACCACTGACAAGAAAAAAT 12840  
Tall white sooner milo 12781:TAGTAGTTGGAGGAGCCAATAACACACACTTTTCTTTGTTACCACTGACAAGAAAAAAT 12840  
bmr-6 12781:TAGTAGTTGGAGGAGCCAATAACACACACTTTTCTTTGTTACCACTGACAAGAAAAAAT 12840  
\*\*\*\*\*

BTx623 12841:GGGGGACTGCTTTGCTTGATTGAGATTAACGACTACTAGAGCGAAACCGGCAATCCCCTT 12900  
Dwarf white milo 12841:GGGGGACTGCTTTGCTTGATTGAGATTAACGACTACTAGAGCGAAACCGGCAATCCCCTT 12900  
Tall white sooner milo 12841:GGGGGACTGCTTTGCTTGATTGAGATTAACGACTACTAGAGCGAAACCGGCAATCCCCTT 12900  
bmr-6 12841:GGGGGACTGCTTTGCTTGATTGAGATTAACGACTACTAGAGCGAAACCGGCAATCCCCTT 12900  
\*\*\*\*\*

BTx623 12901:GCTCGTCGAGTTGCAGTTGCGGACAGCGTCACAGTTTTGTCAACGAAGCGTTCAATAAC 12960  
Dwarf white milo 12901:GCTCGTCGAGTTGCAGTTGCGGACAGCGTCACAGTTTTGTCAACGAAGCGTTCAATAAC 12960  
Tall white sooner milo 12901:GCTCGTCGAGTTGCAGTTGCGGACAGCGTCACAGTTTTGTCAACGAAGCGTTCAATAAC 12960  
bmr-6 12901:GCTCGTCGAGTTGCAGTTGCGGACAGCGTCACAGTTTTGTCAACGAAGCGTTCAATAAC 12960  
\*\*\*\*\*

Figure S4 (page18)

BTx623 12961:TGGGGCTGGGGGAATAAAGAACAGCACCCGAGGGACGGAGCCCACTGCCACCCTATCG 13020  
Dwarf white milo 12961:TGGGGCTGGGGGAATAAAGAACAGCACCCGAGGGACGGAGCCCACTGCCACCCTATCG 13020  
Tall white sooner milo 12961:TGGGGCTGGGGGAATAAAGAACAGCACCCGAGGGACGGAGCCCACTGCCACCCTATCG 13020  
bmr-6 12961:TGGGGCTGGGGGAATAAAGAACAGCACCCGAGGGACGGAGCCCACTGCCACCCTATCG 13020  
\*\*\*\*\*

BTx623 13021:TCTATCGATCTCGTCCATGGCACGGCTCGCGTGTGTCCGTCCGCACTGGCACGTAGCTC 13080  
Dwarf white milo 13021:TCTATCGATCTCGTCCATGGCACGGCTCGCGTGTGTCCGTCCGCACTGGCACGTAGCTC 13080  
Tall white sooner milo 13021:TCTATCGATCTCGTCCATGGCACGGCTCGCGTGTGTCCGTCCGCACTGGCACGTAGCTC 13080  
bmr-6 13021:TCTATCGATCTCGTCCATGGCACGGCTCGCGTGTGTCCGTCCGCACTGGCACGTAGCTC 13080  
\*\*\*\*\*

BTx623 13081:CTTGTCATGGCGCGCCGCCACGGACGCTAGCGTTTTTTTTAGAAAAATCGCAGTGCCGCTC 13140  
Dwarf white milo 13081:CTTGTCATGGCGCGCCGCCACGGACGCTAGCGTTTTTTTTAGAAAAATCGCAGTGCCGCTC 13140  
Tall white sooner milo 13081:CTTGTCATGGCGCGCCGCCACGGACGCTAGCGTTTTTTTTAGAAAAATCGCAGTGCCGCTC 13140  
bmr-6 13081:CTTGTCATGGCGCGCCGCCACGGACGCTAGCGTTTTTTTTAGAAAAATCGCAGTGCCGCTC 13140  
\*\*\*\*\*

BTx623 13141:GTACTGGGCGCCGGCCGCAAGTCAGCCACGTGAACGGTGAACCTAGAGTGCCTAACGA 13200  
Dwarf white milo 13141:GTACTGGGCGCCGGCCGCAAGTCAGCCACGTGAACGGTGAACCTAGAGTGCCTAACGA 13200  
Tall white sooner milo 13141:GTACTGGGCGCCGGCCGCAAGTCAGCCACGTGAACGGTGAACCTAGAGTGCCTAACGA 13200  
bmr-6 13141:GTACTGGGCGCCGGCCGCAAGTCAGCCACGTGAACGGTGAACCTAGAGTGCCTAACGA 13200  
\*\*\*\*\*

BTx623 13201:ACCAGAACTAGTCCAGAATCTCGCTCGCAGTCGAGCTTGCCCGAAACAAAGACCGCGC 13260  
Dwarf white milo 13201:ACCAGAACTAGTCCAGAATCTCGCTCGCAGTCGAGCTTGCCCGAAACAAAGACCGCGC 13260  
Tall white sooner milo 13201:ACCAGAACTAGTCCAGAATCTCGCTCGCAGTCGAGCTTGCCCGAAACAAAGACCGCGC 13260  
bmr-6 13201:ACCAGAACTAGTCCAGAATCTCGCTCGCAGTCGAGCTTGCCCGAAACAAAGACCGCGC 13260  
\*\*\*\*\*

BTx623 13261:GTGCAAAGCAAGAACCACCGGGCCGCGCTCGCCGAAAACCTTGCCGTGACTAGCGCCG 13320  
Dwarf white milo 13261:GTGCAAAGCAAGAACCACCGGGCCGCGCTCGCCGAAAACCTTGCCGTGACTAGCGCCG 13320  
Tall white sooner milo 13261:GTGCAAAGCAAGAACCACCGGGCCGCGCTCGCCGAAAACCTTGCCGTGACTAGCGCCG 13320  
bmr-6 13261:GTGCAAAGCAAGAACCACCGGGCCGCGCTCGCCGAAAACCTTGCCGTGACTAGCGCCG 13320  
\*\*\*\*\*

BTx623 13321:CGACGACGGCGACCTTGGGGACGGGATGGACTCGAGAACCATCGATTTTCGATTTTCGATT 13380  
Dwarf white milo 13321:CGACGACGGCGACCTTGGGGACGGGATGGACTCGAGAACCATCGATTTTCGATTTTCGATT 13380  
Tall white sooner milo 13321:CGACGACGGCGACCTTGGGGACGGGATGGACTCGAGAACCATCGATTTTCGATTTTCGATT 13380  
bmr-6 13321:CGACGACGGCGACCTTGGGGACGGGATGGACTCGAGAACCATCGATTTTCGATTTTCGATT 13380  
\*\*\*\*\*

BTx623 13381:TCGATTTTCGATTTTCAGCGGGTTTGCGGCGCCAGAGCCGTGCCGACGGCGCGACGCCG 13440  
Dwarf white milo 13381:TCGATTTTCGATTTTCAGCGGGTTTGCGGCGCCAGAGCCGTGCCGACGGCGCGACGCCG 13440  
Tall white sooner milo 13381:TCGATTTTCGATTTTCAGCGGGTTTGCGGCGCCAGAGCCGTGCCGACGGCGCGACGCCG 13440  
bmr-6 13381:TCGATTTTCGATTTTCAGCGGGTTTGCGGCGCCAGAGCCGTGCCGACGGCGCGACGCCG 13440  
\*\*\*\*\*

BTx623 13441:AACGCGGCACACCCCCACGCCTGCGCCTCGGCGCGCGGGAGGAAACGGCCGGAGGC 13500  
Dwarf white milo 13441:AACGCGGCACACCCCCACGCCTGCGCCTCGGCGCGCGGGAGGAAACGGCCGGAGGC 13500  
Tall white sooner milo 13441:AACGCGGCACACCCCCACGCCTGCGCCTCGGCGCGCGGGAGGAAACGGCCGGAGGC 13500  
bmr-6 13441:AACGCGGCACACCCCCACGCCTGCGCCTCGGCGCGCGGGAGGAAACGGCCGGAGGC 13500  
\*\*\*\*\*

BTx623 13501:TACTATAGCCGTTGCGGCTGGTCCCCCTGAGCAAGTCGTGCGTTTCGGCAGGC GCGCGGG 13560  
Dwarf white milo 13501:TACTATAGCCGTTGCGGCTGGTCCCCCTGAGCAAGTCGTGCGTTTCGGCAGGC GCGCGGG 13560  
Tall white sooner milo 13501:TACTATAGCCGTTGCGGCTGGTCCCCCTGAGCAAGTCGTGCGTTTCGGCAGGC GCGCGGG 13560  
bmr-6 13501:TACTATAGCCGTTGCGGCTGGTCCCCCTGAGCAAGTCGTGCGTTTCGGCAGGC GCGCGGG 13560  
\*\*\*\*\*

BTx623 13561:GTCGAGACCGGAGGC GCCGAGACCCGAGGTCTGCTGCACTCTGCTACGGGGCGCGTCA 13620  
Dwarf white milo 13561:GTCGAGACCGGAGGC GCCGAGACCCGAGGTCTGCTGCACTCTGCTACGGGGCGCGTCA 13620  
Tall white sooner milo 13561:GTCGAGACCGGAGGC GCCGAGACCCGAGGTCTGCTGCACTCTGCTACGGGGCGCGTCA 13620  
bmr-6 13561:GTCGAGACCGGAGGC GCCGAGACCCGAGGTCTGCTGCACTCTGCTACGGGGCGCGTCA 13620  
\*\*\*\*\*

BTx623 13621:CGGCCCACGAGCACTAGTGAGCAGCCAAGCTAGCCAACAAACAGGACAGGAGGCTCCGT 13680  
Dwarf white milo 13621:CGGCCCACGAGCACTAGTGAGCAGCCAAGCTAGCCAACAAACAGGACAGGAGGCTCCGT 13680  
Tall white sooner milo 13621:CGGCCCACGAGCACTAGTGAGCAGCCAAGCTAGCCAACAAACAGGACAGGAGGCTCCGT 13680  
bmr-6 13621:CGGCCCACGAGCACTAGTGAGCAGCCAAGCTAGCCAACAAACAGGACAGGAGGCTCCGT 13680  
\*\*\*\*\*

Figure S4 (page19)

BTx623 13681:GCCGCTGCATTGCTTACTTGGGGCGACGACCGCGTCACAGAATTGGTCATTATGGCT 13740  
Dwarf white milo 13681:GCCGCTGCATTGCTTACTTGGGGCGACGACCGCGTCACAGAATTGGTCATTATGGCT 13740  
Tall white sooner milo 13681:GCCGCTGCATTGCTTACTTGGGGCGACGACCGCGTCACAGAATTGGTCATTATGGCT 13740  
bmr-6 13681:GCCGCTGCATTGCTTACTTGGGGCGACGACCGCGTCACAGAATTGGTCATTATGGCT 13740  
\*\*\*\*\*

BTx623 13741:GTTTCTTGCCCGTTGGCAGTAGAGCCAGCCAGGTAAGATAAAGTAACTGGAGTCTACACCGTCA 13800  
Dwarf white milo 13741:GTTTCTTGCCCGTTGGCAGTAGAGCCAGCCAGGTAAGATAAAGTAACTGGAGTCTACACCGTCA 13800  
Tall white sooner milo 13741:GTTTCTTGCCCGTTGGCAGTAGAGCCAGCCAGGTAAGATAAAGTAACTGGAGTCTACACCGTCA 13800  
bmr-6 13741:GTTTCTTGCCCGTTGGCAGTAGAGCCAGCCAGGTAAGATAAAGTAACTGGAGTCTACACCGTCA 13800  
\*\*\*\*\*

BTx623 13801:AAACTCTTTTGTGGCCACACATCCTGTTGCGTAGATTGGCTGCATATATTTGTTGGTAG 13860  
Dwarf white milo 13801:AAACTCTTTTGTGGCCACACATCCTGTTGCGTAGATTGGCTGCATATATTTGTTGGTAG 13860  
Tall white sooner milo 13801:AAACTCTTTTGTGGCCACACATCCTGTTGCGTAGATTGGCTGCATATATTTGTTGGTAG 13860  
bmr-6 13801:AAACTCTTTTGTGGCCACACATCCTGTTGCGTAGATTGGCTGCATATATTTGTTGGTAG 13860  
\*\*\*\*\*

BTx623 13861:TTGGTGAGGCTTATAATATATGATCGATCATTGTCACGGTATGGATAGAAATGGAGAGGA 13920  
Dwarf white milo 13861:TTGGTGAGGCTTATAATATATGATCGATCATTGTCACGGTATGGATAGAAATGGAGAGGA 13920  
Tall white sooner milo 13861:TTGGTGAGGCTTATAATATATGATCGATCATTGTCACGGTATGGATAGAAATGGAGAGGA 13920  
bmr-6 13861:TTGGTGAGGCTTATAATATATGATCGATCATTGTCACGGTATGGATAGAAATGGAGAGGA 13920  
\*\*\*\*\*

BTx623 13921:AGGATTCAGTGGCTTGCACTTGGCACAAGCAAAGGCGATACTGACTAAACGTGAATGT 13980  
Dwarf white milo 13921:AGGATTCAGTGGCTTGCACTTGGCACAAGCAAAGGCGATACTGACTAAACGTGAATGT 13980  
Tall white sooner milo 13921:AGGATTCAGTGGCTTGCACTTGGCACAAGCAAAGGCGATACTGACTAAACGTGAATGT 13980  
bmr-6 13921:AGGATTCAGTGGCTTGCACTTGGCACAAGCAAAGGCGATACTGACTAAACGTGAATGT 13980  
\*\*\*\*\*

BTx623 13981:TAGATAAGTATTCAGCGATGACAGCGACAACGCGAGGCATTGACTTGGAGCAGTGCTA 14040  
Dwarf white milo 13981:TAGATAAGTATTCAGCGATGACAGCGACAACGCGAGGCATTGACTTGGAGCAGTGCTA 14040  
Tall white sooner milo 13981:TAGATAAGTATTCAGCGATGACAGCGACAACGCGAGGCATTGACTTGGAGCAGTGCTA 14040  
bmr-6 13981:TAGATAAGTATTCAGCGATGACAGCGACAACGCGAGGCATTGACTTGGAGCAGTGCTA 14040  
\*\*\*\*\*

BTx623 14041:TCTCCACAGGCGACTGGTTCAACTTCAAGCAGGCTGATGATAGATAGTGGCCTTGTTTAC 14100  
Dwarf white milo 14041:TCTCCACAGGCGACTGGTTCAACTTCAAGCAGGCTGATGATAGATAGTGGCCTTGTTTAC 14100  
Tall white sooner milo 14041:TCTCCACAGGCGACTGGTTCAACTTCAAGCAGGCTGATGATAGATAGTGGCCTTGTTTAC 14100  
bmr-6 14041:TCTCCACAGGCGACTGGTTCAACTTCAAGCAGGCTGATGATAGATAGTGGCCTTGTTTAC 14100  
\*\*\*\*\*

BTx623 14101:TTCCATCCAAAATCCGAAAAAAAATTCAGATTTTTTCATTATATCGAATCTTTGAATAC 14160  
Dwarf white milo 14101:TTCCATCCAAAATCCGAAAAAAAATTCAGATTTTTTCATTATATCGAATCTTTGAATAC 14160  
Tall white sooner milo 14101:TTCCATCCAAAATCCGAAAAAAAATTCAGATTTTTTCATTATATCGAATCTTTGAATAC 14160  
bmr-6 14101:TTCCATCCAAAATCCGAAAAAAAATTCAGATTTTTTCATTATATCGAATCTTTGAATAC 14160  
\*\*\*\*\*

BTx623 14161:ATATATGGAGCATTAAATATAGACAAAATAAAAATAAATATACAGTTTATTTGTAATTC 14220  
Dwarf white milo 14161:ATATATGGAGCATTAAATATAGACAAAATAAAAATAAATATACAGTTTATTTGTAATTC 14220  
Tall white sooner milo 14161:ATATATGGAGCATTAAATATAGACAAAATAAAAATAAATATACAGTTTATTTGTAATTC 14220  
bmr-6 14161:ATATATGGAGCATTAAATATAGACAAAATAAAAATAAATATACAGTTTATTTGTAATTC 14220  
\*\*\*\*\*

BTx623 14221:ACGGGATGAATCTTTTAAAGCCTATTTAGTCCATAAATTAGATAAATAACTTTCAAATACAAA 14280  
Dwarf white milo 14221:ACGGGATGAATCTTTTAAAGCCTATTTAGTCCATAAATTAGATAAATAACTTTCAAATACAAA 14280  
Tall white sooner milo 14221:ACGGGATGAATCTTTTAAAGCCTATTTAGTCCATAAATTAGATAAATAACTTTCAAATACAAA 14280  
bmr-6 14221:ACGGGATGAATCTTTTAAAGCCTATTTAGTCCATAAATTAGATAAATAACTTTCAAATACAAA 14280  
\*\*\*\*\*

BTx623 14281:TGTAAGTGCTACAGTGTCTCGAAAAATTCGAGAAGAACTAAACATGGCCACACTATGGC 14340  
Dwarf white milo 14281:TGTAAGTGCTACAGTGTCTCGAAAAATTCGAGAAGAACTAAACATGGCCACACTATGGC 14340  
Tall white sooner milo 14281:TGTAAGTGCTACAGTGTCTCGAAAAATTCGAGAAGAACTAAACATGGCCACACTATGGC 14340  
bmr-6 14281:TGTAAGTGCTACAGTGTCTCGAAAAATTCGAGAAGAACTAAACATGGCCACACTATGGC 14340  
\*\*\*\*\*

BTx623 14341:CCTGTTTGCTTCAACTATCTACCGAATCTACTAGTCATTATTAGTGTGTTTTCTCTCAT 14400  
Dwarf white milo 14341:CCTGTTTGCTTCAACTATCTACCGAATCTACTAGTCATTATTAGTGTGTTTTCTCTCAT 14400  
Tall white sooner milo 14341:CCTGTTTGCTTCAACTATCTACCGAATCTACTAGTCATTATTAGTGTGTTTTCTCTCAT 14400  
bmr-6 14341:CCTGTTTGCTTCAACTATCTACCGAATCTACTAGTCATTATTAGTGTGTTTTCTCTCAT 14400  
\*\*\*\*\*

Figure S4 (page20)



BTx623 14401:AATAAATCAACGAATAAAAACCTTTAGCCAATTTTTCAGACATGTTGTAAGGAATCTTAA 14460  
Dwarf white milo 14401:AATAAATCAACGAATAAAAACCTTTAGCCAATTTTTCAGACATGTTGTAAGGAATCTTAA 14460  
Tall white sooner milo 14401:AATAAATCAACGAATAAAAACCTTTAGCCAATTTTTCAGACATGTTGTAAGGAATCTTAA 14460  
bmr-6 14401:AATAAATCAACGAATAAAAACCTTTAGCCAATTTTTCAGACATGTTGTAAGGAATCTTAA 14460  
\*\*\*\*\*

BTx623 14461:TTGTTCAATTCATGTGTGCATATGGACATAGTGGTGAACCTTAGTCTCATTTTAGCCTTG 14520  
Dwarf white milo 14461:TTGTTCAATTCATGTGTGCATATGGACATAGTGGTGAACCTTAGTCTCATTTTAGCCTTG 14520  
Tall white sooner milo 14461:TTGTTCAATTCATGTGTGCATATGGACATAGTGGTGAACCTTAGTCTCATTTTAGCCTTG 14520  
bmr-6 14461:TTGTTCAATTCATGTGTGCATATGGACATAGTGGTGAACCTTAGTCTCATTTTAGCCTTG 14520  
\*\*\*\*\*

BTx623 14521:TTTAGTTCATTATCAGATTTTTTTGGCTAATGTAGCACTTTCGTTTGATTTGACAATT 14580  
Dwarf white milo 14521:TTTAGTTCATTATCAGATTTTTTTGGCTAATGTAGCACTTTCGTTTGATTTGACAATT 14580  
Tall white sooner milo 14521:TTTAGTTCATTATCAGATTTTTTTGGCTAATGTAGCACTTTCGTTTGATTTGACAATT 14580  
bmr-6 14521:TTTAGTTCATTATCAGATTTTTTTGGCTAATGTAGCACTTTCGTTTGATTTGACAATT 14580  
\*\*\*\*\*

BTx623 14581:ATTGTTCAATCATGAATTAAGTGGTAAAGTTTCGTCTCACAAATTCAGGTAACCT 14640  
Dwarf white milo 14581:ATTGTTCAATCATGAATTAAGTGGTAAAGTTTCGTCTCACAAATTCAGGTAACCT 14640  
Tall white sooner milo 14581:ATTGTTCAATCATGAATTAAGTGGTAAAGTTTCGTCTCACAAATTCAGGTAACCT 14640  
bmr-6 14581:ATTGTTCAATCATGAATTAAGTGGTAAAGTTTCGTCTCACAAATTCAGGTAACCT 14640  
\*\*\*\*\*

BTx623 14641:ATGCAATTAGTTATTTTTATCTATATTTAAAGCTCTATGCATATGCAACAAGATTTGAT 14700  
Dwarf white milo 14641:ATGCAATTAGTTATTTTTATCTATATTTAAAGCTCTATGCATATGCAACAAGATTTGAT 14700  
Tall white sooner milo 14641:ATGCAATTAGTTATTTTTATCTATATTTAAAGCTCTATGCATATGCAACAAGATTTGAT 14700  
bmr-6 14641:ATGCAATTAGTTATTTTTATCTATATTTAAAGCTCTATGCATATGCAACAAGATTTGAT 14700  
\*\*\*\*\*

BTx623 14701:GTGATGAATTTTTTTAAAAAATATTAGATTTTAGGTGAAACTAAACAAGTCTTAGTA 14760  
Dwarf white milo 14701:GTGATGAATTTTTTTAAAAAATATTAGATTTTAGGTGAAACTAAACAAGTCTTAGTA 14760  
Tall white sooner milo 14701:GTGATGAATTTTTTTAAAAAATATTAGATTTTAGGTGAAACTAAACAAGTCTTAGTA 14760  
bmr-6 14701:GTGATGAATTTTTTTAAAAAATATTAGATTTTAGGTGAAACTAAACAAGTCTTAGTA 14760  
\*\*\*\*\*

BTx623 14761:GTTGAAGTGGATGATGTCATTTTTAGATATGAAAGCCCTTTCCTCCGCTTCACTATAT 14820  
Dwarf white milo 14761:GTTGAAGTGGATGATGTCATTTTTAGATATGAAAGCCCTTTCCTCCGCTTCACTATAT 14820  
Tall white sooner milo 14761:GTTGAAGTGGATGATGTCATTTTTAGATATGAAAGCCCTTTCCTCCGCTTCACTATAT 14820  
bmr-6 14761:GTTGAAGTGGATGATGTCATTTTTAGATATGAAAGCCCTTTCCTCCGCTTCACTATAT 14820  
\*\*\*\*\*

BTx623 14821:CTAATGTGAGAAGAGAGAAAGAACTCCATGCGTGTGTGCTCGCGATGACAGCCGTGTGG 14880  
Dwarf white milo 14821:CTAATGTGAGAAGAGAGAAAGAACTCCATGCGTGTGTGCTCGCGATGACAGCCGTGTGG 14880  
Tall white sooner milo 14821:CTAATGTGAGAAGAGAGAAAGAACTCCATGCGTGTGTGCTCGCGATGACAGCCGTGTGG 14880  
bmr-6 14821:CTAATGTGAGAAGAGAGAAAGAACTCCATGCGTGTGTGCTCGCGATGACAGCCGTGTGG 14880  
\*\*\*\*\*

BTx623 14881:CAGGTCAGAGCGTGAAGAGAGAGGAGCCTGACAAAGCCCTTTTATATAAGTTAATTA 14940  
Dwarf white milo 14881:CAGGTCAGAGCGTGAAGAGAGAGGAGCCTGACAAAGCCCTTTTATATAAGTTAATTA 14940  
Tall white sooner milo 14881:CAGGTCAGAGCGTGAAGAGAGAGGAGCCTGACAAAGCCCTTTTATATAAGTTAATTA 14940  
bmr-6 14881:CAGGTCAGAGCGTGAAGAGAGAGGAGCCTGACAAAGCCCTTTTATATAAGTTAATTA 14940  
\*\*\*\*\*

BTx623 14941:CGAGAAATTATTCAAGACATACGTTTTCTCTTCTACTTTTTTTAGTCGTTTCAATA 15000  
Dwarf white milo 14941:CGAGAAATTATTCAAGACATACGTTTTCTCTTCTACTTTTTTTAGTCGTTTCAATA 15000  
Tall white sooner milo 14941:CGAGAAATTATTCAAGACATACGTTTTCTCTTCTACTTTTTTTAGTCGTTTCAATA 15000  
bmr-6 14941:CGAGAAATTATTCAAGACATACGTTTTCTCTTCTACTTTTTTTAGTCGTTTCAATA 15000  
\*\*\*\*\*

BTx623 15001:CTTACTGATTTATCAAGTGTACGCCAGAGTGTGAAAGAAGAGGAAGCCTGACAAAGCCC 15060  
Dwarf white milo 15001:CTTACTGATTTATCAAGTGTACGCCAGAGTGTGAAAGAAGAGGAAGCCTGACAAAGCCC 15060  
Tall white sooner milo 15001:CTTACTGATTTATCAAGTGTACGCCAGAGTGTGAAAGAAGAGGAAGCCTGACAAAGCCC 15060  
bmr-6 15001:CTTACTGATTTATCAAGTGTACGCCAGAGTGTGAAAGAAGAGGAAGCCTGACAAAGCCC 15060  
\*\*\*\*\*

BTx623 15061:TTTTTTATATCTAAGTTAATTACGAGAAATCACTCGAGACACACGTTTTCTCTTTCTTTA 15120  
Dwarf white milo 15061:TTTTTTATATCTAAGTTAATTACGAGAAATCACTCGAGACACACGTTTTCTCTTTCTTTA 15120  
Tall white sooner milo 15061:TTTTTTATATCTAAGTTAATTACGAGAAATCACTCGAGACACACGTTTTCTCTTTCTTTA 15120  
bmr-6 15061:TTTTTTATATCTAAGTTAATTACGAGAAATCACTCGAGACACACGTTTTCTCTTTCTTTA 15120  
\*\*\*\*\*

BTx623 15121:ATTTTTTAGCTGTTTCAAATACTTGATTTATCAAGTGTGTTTTAGAGAGGTGCTTCAA 15180  
Dwarf white milo 15121:ATTTTTTAGCTGTTTCAAATACTTGATTTATCAAGTGTGTTTTAGAGAGGTGCTTCAA 15180  
Tall white sooner milo 15121:ATTTTTTAGCTGTTTCAAATACTTGATTTATCAAGTGTGTTTTAGAGAGGTGCTTCAA 15180  
bmr-6 15121:ATTTTTTAGCTGTTTCAAATACTTGATTTATCAAGTGTGTTTTAGAGAGGTGCTTCAA 15180  
\*\*\*\*\*

BTx623 15181:TGAAAGTGTGAAAGCACCCGCTGCGCCCTTGTTTAGGGTAGGTTGCTTATTCTTATTG 15240  
Dwarf white milo 15181:TGAAAGTGTGAAAGCACCCGCTGCGCCCTTGTTTAGGGTAGGTTGCTTATTCTTATTG 15240  
Tall white sooner milo 15181:TGAAAGTGTGAAAGCACCCGCTGCGCCCTTGTTTAGGGTAGGTTGCTTATTCTTATTG 15240  
bmr-6 15181:TGAAAGTGTGAAAGCACCCGCTGCGCCCTTGTTTAGGGTAGGTTGCTTATTCTTATTG 15240  
\*\*\*\*\*

BTx623 15241:TGTAATTCGTCACCTTTAAATTATAAATTCCTTGGTTTTGTTAGATAGATAGATTTTAC 15300  
Dwarf white milo 15241:TGTAATTCGTCACCTTTAAATTATAAATTCCTTGGTTTTGTTAGATAGATAGATTTTAC 15300  
Tall white sooner milo 15241:TGTAATTCGTCACCTTTAAATTATAAATTCCTTGGTTTTGTTAGATAGATAGATTTTAC 15300  
bmr-6 15241:TGTAATTCGTCACCTTTAAATTATAAATTCCTTGGTTTTGTTAGATAGATAGATTTTAC 15300  
\*\*\*\*\*

BTx623 15301:TATATATTTAGATATAGATTTTTTAAAGAGCAACAAGAGGTTTGCATGGTTTTATTGA 15360  
Dwarf white milo 15301:TATATATTTAGATATAGATTTTTTAAAGAGCAACAAGAGGTTTGCATGGTTTTATTGA 15360  
Tall white sooner milo 15301:TATATATTTAGATATAGATTTTTTAAAGAGCAACAAGAGGTTTGCATGGTTTTATTGA 15360  
bmr-6 15301:TATATATTTAGATATAGATTTTTTAAAGAGCAACAAGAGGTTTGCATGGTTTTATTGA 15360  
\*\*\*\*\*

BTx623 15361:CGATAAAAAGAGCAAAAACATGATTACAAATGCATGACTAGAGTAACACCGGTGGTCCAC 15420  
Dwarf white milo 15361:CGATAAAAAGAGCAAAAACATGATTACAAATGCATGACTAGAGTAACACCGGTGGTCCAC 15420  
Tall white sooner milo 15361:CGATAAAAAGAGCAAAAACATGATTACAAATGCATGACTAGAGTAACACCGGTGGTCCAC 15420  
bmr-6 15361:CGATAAAAAGAGCAAAAACATGATTACAAATGCATGACTAGAGTAACACCGGTGGTCCAC 15420  
\*\*\*\*\*

BTx623 15421:AACTACCAATCCTGATGTGACAAAAAGAAAAAGAGAGAGAGAAAAAAGACACAACA 15480  
Dwarf white milo 15421:AACTACCAATCCTGATGTGACAAAAAGAAAAAGAGAGAGAGAAAAAAGACACAACA 15480  
Tall white sooner milo 15421:AACTACCAATCCTGATGTGACAAAAAGAAAAAGAGAGAGAGAAAAAAGACACAACA 15480  
bmr-6 15421:AACTACCAATCCTGATGTGACAAAAAGAAAAAGAGAGAGAGAAAAAAGACACAACA 15480  
\*\*\*\*\*

BTx623 15481:GGTCAGAAAAAAGGTCATAAAAAGTACCTCCAAAAAATCCAAGAGGAATGGCACAACAC 15540  
Dwarf white milo 15481:GGTCAGAAAAAAGGTCATAAAAAGTACCTCCAAAAAATCCAAGAGGAATGGCACAACAC 15540  
Tall white sooner milo 15481:GGTCAGAAAAAAGGTCATAAAAAGTACCTCCAAAAAATCCAAGAGGAATGGCACAACAC 15540  
bmr-6 15481:GGTCAGAAAAAAGGTCATAAAAAGTACCTCCAAAAAATCCAAGAGGAATGGCACAACAC 15540  
\*\*\*\*\*

BTx623 15541:AATGACTAAACGCAACTAAAAAAGTAAAGACAACCTTTAAAAGAATCTGTGGTAGTATT 15600  
Dwarf white milo 15541:AATGACTAAACGCAACTAAAAAAGTAAAGACAACCTTTAAAAGAATCTGTGGTAGTATT 15600  
Tall white sooner milo 15541:AATGACTAAACGCAACTAAAAAAGTAAAGACAACCTTTAAAAGAATCTGTGGTAGTATT 15600  
bmr-6 15541:AATGACTAAACGCAACTAAAAAAGTAAAGACAACCTTTAAAAGAATCTGTGGTAGTATT 15600  
\*\*\*\*\*

BTx623 15601:TGTTATAGTGCCAAGTTAAACTGTTGATATCATGCTTGCACAAGAGAGTAGCTAGTTA 15660  
Dwarf white milo 15601:TGTTATAGTGCCAAGTTAAACTGTTGATATCATGCTTGCACAAGAGAGTAGCTAGTTA 15660  
Tall white sooner milo 15601:TGTTATAGTGCCAAGTTAAACTGTTGATATCATGCTTGCACAAGAGAGTAGCTAGTTA 15660  
bmr-6 15601:TGTTATAGTGCCAAGTTAAACTGTTGATATCATGCTTGCACAAGAGAGTAGCTAGTTA 15660  
\*\*\*\*\*

BTx623 15661:GATTCGATGTCACGAAAGAATTTAAAATTTTTTGAATTGGTGCAACTAAAAGGCCTT 15720  
Dwarf white milo 15661:GATTCGATGTCACGAAAGAATTTAAAATTTTTTGAATTGGTGCAACTAAAAGGCCTT 15720  
Tall white sooner milo 15661:GATTCGATGTCACGAAAGAATTTAAAATTTTTTGAATTGGTGCAACTAAAAGGCCTT 15720  
bmr-6 15661:GATTCGATGTCACGAAAGAATTTAAAATTTTTTGAATTGGTGCAACTAAAAGGCCTT 15720  
\*\*\*\*\*

BTx623 15721:ATTTCTGTTTCAATCATCGGCCAGCTTTACTGAGATGCCAATCTCGGGCATCCTCCATT 15780  
Dwarf white milo 15721:ATTTCTGTTTCAATCATCGGCCAGCTTTACTGAGATGCCAATCTCGGGCATCCTCCATT 15780  
Tall white sooner milo 15721:ATTTCTGTTTCAATCATCGGCCAGCTTTACTGAGATGCCAATCTCGGGCATCCTCCATT 15780  
bmr-6 15721:ATTTCTGTTTCAATCATCGGCCAGCTTTACTGAGATGCCAATCTCGGGCATCCTCCATT 15780  
\*\*\*\*\*

BTx623 15781:TTACATGGGTTGGACCACTTGGACGGAGTAACGACCACGTGGTTCTCGCTATATTTGAAC 15840  
Dwarf white milo 15781:TTACATGGGTTGGACCACTTGGACGGAGTAACGACCACGTGGTTCTCGCTATATTTGAAC 15840  
Tall white sooner milo 15781:TTACATGGGTTGGACCACTTGGACGGAGTAACGACCACGTGGTTCTCGCTATATTTGAAC 15840  
bmr-6 15781:TTACATGGGTTGGACCACTTGGACGGAGTAACGACCACGTGGTTCTCGCTATATTTGAAC 15840  
\*\*\*\*\*

Figure S4 (page22)

BTx623 15841:GCATGCCTTCCC GCGGAATCGCGCACCGG CAGCGCGAAGGCCAGCTATGCACAGCGA 15900  
Dwarf white milo 15841:GCATGCCTTCCC GCGGAATCGCGCACCGG CAGCGCGAAGGCCAGCTATGCACAGCGA 15900  
Tall white sooner milo 15841:GCATGCCTTCCC GCGGAATCGCGCACCGG CAGCGCGAAGGCCAGCTATGCACAGCGA 15900  
bmr-6 15841:GCATGCCTTCCC GCGGAATCGCGCACCGG CAGCGCGAAGGCCAGCTATGCACAGCGA 15900  
\*\*\*\*\*

BTx623 15901:ATGGAGCTAGAAACCGCGCGGCGAGCGCGCGCAGCAAGACGATCAAATTTAGGCGC 15960  
Dwarf white milo 15901:ATGGAGCTAGAAACCGCGCGGCGAGCGCGCGCAGCAAGACGATCAAATTTAGGCGC 15960  
Tall white sooner milo 15901:ATGGAGCTAGAAACCGCGCGGCGAGCGCGCGCAGCAAGACGATCAAATTTAGGCGC 15960  
bmr-6 15901:ATGGAGCTAGAAACCGCGCGGCGAGCGCGCGCAGCAAGACGATCAAATTTAGGCGC 15960  
\*\*\*\*\*

BTx623 15961:CAGAATGACTAGAGGAGCGGTACCGCAGGAGGAGGCCGAGGGAAGGGGAGACCGGCTC 16020  
Dwarf white milo 15961:CAGAATGACTAGAGGAGCGGTACCGCAGGAGGAGGCCGAGGGAAGGGGAGACCGGCTC 16020  
Tall white sooner milo 15961:CAGAATGACTAGAGGAGCGGTACCGCAGGAGGAGGCCGAGGGAAGGGGAGACCGGCTC 16020  
bmr-6 15961:CAGAATGACTAGAGGAGCGGTACCGCAGGAGGAGGCCGAGGGAAGGGGAGACCGGCTC 16020  
\*\*\*\*\*

BTx623 16021:CTCGACCTCTCCGCCCGCGCCGCGCAATGGGTCCCCACCCGCTCTGCGGTATC 16080  
Dwarf white milo 16021:CTCGACCTCTCCGCCCGCGCCGCGCAATGGGTCCCCACCCGCTCTGCGGTATC 16080  
Tall white sooner milo 16021:CTCGACCTCTCCGCCCGCGCCGCGCAATGGGTCCCCACCCGCTCTGCGGTATC 16080  
bmr-6 16021:CTCGACCTCTCCGCCCGCGCCGCGCAATGGGTCCCCACCCGCTCTGCGGTATC 16080  
\*\*\*\*\*

BTx623 16081:GCCGTGGCCTTCTCTCTCTCGCTCTCCGGTGAGGCGTTCTTCGACATCTTCACTTC 16140  
Dwarf white milo 16081:GCCGTGGCCTTCTCTCTCTCGCTCTCCGGTGAGGCGTTCTTCGACATCTTCACTTC 16140  
Tall white sooner milo 16081:GCCGTGGCCTTCTCTCTCTCGCTCTCCGGTGAGGCGTTCTTCGACATCTTCACTTC 16140  
bmr-6 16081:GCCGTGGCCTTCTCTCTCTCGCTCTCCGGTGAGGCGTTCTTCGACATCTTCACTTC 16140  
\*\*\*\*\*

BTx623 16141:TTCACCCGCACTCGGAGACCGACTACTTCCAGAACGCCTTCGAGGGCACGCCGGAGCAG 16200  
Dwarf white milo 16141:TTCACCCGCACTCGGAGACCGACTACTTCCAGAACGCCTTCGAGGGCACGCCGGAGCAG 16200  
Tall white sooner milo 16141:TTCACCCGCACTCGGAGACCGACTACTTCCAGAACGCCTTCGAGGGCACGCCGGAGCAG 16200  
bmr-6 16141:TTCACCCGCACTCGGAGACCGACTACTTCCAGAACGCCTTCGAGGGCACGCCGGAGCAG 16200  
\*\*\*\*\*

BTx623 16201:ACGGTGCCACGACGAGCAGGAGGAGGAGCGGGCGCGCCGCGCCCTCGCCACGGGC 16260  
Dwarf white milo 16201:ACGGTGCCACGACGAGCAGGAGGAGGAGCGGGCGCGCCGCGCCCTCGCCACGGGC 16260  
Tall white sooner milo 16201:ACGGTGCCACGACGAGCAGGAGGAGGAGCGGGCGCGCCGCGCCCTCGCCACGGGC 16260  
bmr-6 16201:ACGGTGCCACGACGAGCAGGAGGAGGAGCGGGCGCGCCGCGCCCTCGCCACGGGC 16260  
\*\*\*\*\*

BTx623 16261:CTCACCAGGTGCGCGCGGGGACCGCCAGCAAGGCTGCGCAGGACACGGTCGCGCTC 16320  
Dwarf white milo 16261:CTCACCAGGTGCGCGCGGGGACCGCCAGCAAGGCTGCGCAGGACACGGTCGCGCTC 16320  
Tall white sooner milo 16261:CTCACCAGGTGCGCGCGGGGACCGCCAGCAAGGCTGCGCAGGACACGGTCGCGCTC 16320  
bmr-6 16261:CTCACCAGGTGCGCGCGGGGACCGCCAGCAAGGCTGCGCAGGACACGGTCGCGCTC 16320  
\*\*\*\*\*

BTx623 16321:CCCGCCGACAAAGCGCGGGGAGTCGGCTCGTGACCATCGTCAGCGAAAACCTCCGGC 16380  
Dwarf white milo 16321:CCCGCCGACAAAGCGCGGGGAGTCGGCTCGTGACCATCGTCAGCGAAAACCTCCGGC 16380  
Tall white sooner milo 16321:CCCGCCGACAAAGCGCGGGGAGTCGGCTCGTGACCATCGTCAGCGAAAACCTCCGGC 16380  
bmr-6 16321:CCCGCCGACAAAGCGCGGGGAGTCGGCTCGTGACCATCGTCAGCGAAAACCTCCGGC 16380  
\*\*\*\*\*

BTx623 16381:GTGTCGGCCATGCACATGGTCTGTTATGCGCCATGGCAAGGCCGTCATGTTTCGATACCAGC 16440  
Dwarf white milo 16381:GTGTCGGCCATGCACATGGTCTGTTATGCGCCATGGCAAGGCCGTCATGTTTCGATACCAGC 16440  
Tall white sooner milo 16381:GTGTCGGCCATGCACATGGTCTGTTATGCGCCATGGCAAGGCCGTCATGTTTCGATACCAGC 16440  
bmr-6 16381:GTGTCGGCCATGCACATGGTCTGTTATGCGCCATGGCAAGGCCGTCATGTTTCGATACCAGC 16440  
\*\*\*\*\*

BTx623 16441:ACCACCGGGCGGTACTCATGCGGTTGCCCCAGGACAACGCGCATCGACCCGCGCGCC 16500  
Dwarf white milo 16441:ACCACCGGGCGGTACTCATGCGGTTGCCCCAGGACAACGCGCATCGACCCGCGCGCC 16500  
Tall white sooner milo 16441:ACCACCGGGCGGTACTCATGCGGTTGCCCCAGGACAACGCGCATCGACCCGCGCGCC 16500  
bmr-6 16441:ACCACCGGGCGGTACTCATGCGGTTGCCCCAGGACAACGCGCATCGACCCGCGCGCC 16500  
\*\*\*\*\*

BTx623 16501:AAGGAGGAGGGCACCATGGACTGCTGGGCGCACTCCGTCGAGTTCGACTACAACACCGGC 16560  
Dwarf white milo 16501:AAGGAGGAGGGCACCATGGACTGCTGGGCGCACTCCGTCGAGTTCGACTACAACACCGGC 16560  
Tall white sooner milo 16501:AAGGAGGAGGGCACCATGGACTGCTGGGCGCACTCCGTCGAGTTCGACTACAACACCGGC 16560  
bmr-6 16501:AAGGAGGAGGGCACCATGGACTGCTGGGCGCACTCCGTCGAGTTCGACTACAACACCGGC 16560  
\*\*\*\*\*

Figure S4 (page23)

BTx623 16561:GGCTCCGCCCTCTCAAGGTTATTGGCTGCCTAACGTTCTTGCATGCATGTGCAATGGC 16620  
Dwarf white milo 16561:GGCTCCGCCCTCTCAAGGTTATTGGCTGCCTAACGTTCTTGCATGCATGTGCAATGGC 16620  
Tall white sooner milo 16561:GGCTCCGCCCTCTCAAGGTTATTGGCTGCCTAACGTTCTTGCATGCATGTGCAATGGC 16620  
bmr-6 16561:GGCTCCGCCCTCTCAAGGTTATTGGCTGCCTAACGTTCTTGCATGCATGTGCAATGGC 16620  
\*\*\*\*\*

BTx623 16621:TCCGGTCCCAGTCTCAGGCCGTTTTGATGGCATGCAATGCAATGCAATGCGCAGATCTT 16680  
Dwarf white milo 16621:TCCGGTCCCAGTCTCAGGCCGTTTTGATGGCATGCAATGCAATGCAATGCGCAGATCTT 16680  
Tall white sooner milo 16621:TCCGGTCCCAGTCTCAGGCCGTTTTGATGGCATGCAATGCAATGCAATGCGCAGATCTT 16680  
bmr-6 16621:TCCGGTCCCAGTCTCAGGCCGTTTTGATGGCATGCAATGCAATGCAATGCGCAGATCTT 16680  
\*\*\*\*\*

BTx623 16681:AACAGACACATGGTGTCTGTCGGGCGCTTGGACCCGGACGGCAACCTGGTGCAGACCGG 16740  
Dwarf white milo 16681:AACAGACACATGGTGTCTGTCGGGCGCTTGGACCCGGACGGCAACCTGGTGCAGACCGG 16740  
Tall white sooner milo 16681:AACAGACACATGGTGTCTGTCGGGCGCTTGGACCCGGACGGCAACCTGGTGCAGACCGG 16740  
bmr-6 16681:AACAGACACATGGTGTCTGTCGGGCGCTTGGACCCGGACGGCAACCTGGTGCAGACCGG 16740  
\*\*\*\*\*

BTx623 16741:CGGCTACTTCGAGGGCGAGAAGGTTGTGAGGACCCTGAGCCCGTGCACACCTGCGACTG 16800  
Dwarf white milo 16741:CGGCTACTTCGAGGGCGAGAAGGTTGTGAGGACCCTGAGCCCGTGCACACCTGCGACTG 16800  
Tall white sooner milo 16741:CGGCTACTTCGAGGGCGAGAAGGTTGTGAGGACCCTGAGCCCGTGCACACCTGCGACTG 16800  
bmr-6 16741:CGGCTACTTCGAGGGCGAGAAGGTTGTGAGGACCCTGAGCCCGTGCACACCTGCGACTG 16800  
\*\*\*\*\*

BTx623 16801:GCTGGAGCAACCAACAGCTTCGCCGAGGGGAGATGGTACGCGACGAGGTAGCGCTCCC 16860  
Dwarf white milo 16801:GCTGGAGCAACCAACAGCTTCGCCGAGGGGAGATGGTACGCGACGAGGTAGCGCTCCC 16860  
Tall white sooner milo 16801:GCTGGAGCAACCAACAGCTTCGCCGAGGGGAGATGGTACGCGACGAGGTAGCGCTCCC 16860  
bmr-6 16801:GCTGGAGCAACCAACAGCTTCGCCGAGGGGAGATGGTACGCGACGAGGTAGCGCTCCC 16860  
\*\*\*\*\*

BTx623 16861:GGACGGCCGGTTCATCATGTTCCGGCGTCCGCCGCTTCAGCTACGAGTACGTCCCGTG 16920  
Dwarf white milo 16861:GGACGGCCGGTTCATCATGTTCCGGCGTCCGCCGCTTCAGCTACGAGTACGTCCCGTG 16920  
Tall white sooner milo 16861:GGACGGCCGGTTCATCATGTTCCGGCGTCCGCCGCTTCAGCTACGAGTACGTCCCGTG 16920  
bmr-6 16861:GGACGGCCGGTTCATCATGTTCCGGCGTCCGCCGCTTCAGCTACGAGTACGTCCCGTG 16920  
\*\*\*\*\*

BTx623 16921:GCCCAGGAGTCCAACGACAAGGCCGTCGGTTGCCCTTCTCCGCGAGACCACCGACGA 16980  
Dwarf white milo 16921:GCCCAGGAGTCCAACGACAAGGCCGTCGGTTGCCCTTCTCCGCGAGACCACCGACGA 16980  
Tall white sooner milo 16921:GCCCAGGAGTCCAACGACAAGGCCGTCGGTTGCCCTTCTCCGCGAGACCACCGACGA 16980  
bmr-6 16921:GCCCAGGAGTCCAACGACAAGGCCGTCGGTTGCCCTTCTCCGCGAGACCACCGACGA 16980  
\*\*\*\*\*

BTx623 16981:CGTGGAGAACAACCTGTACCCGTTCTGTAACCTCCTCCCAGCGGCAACCTGTTCTCTT 17040  
Dwarf white milo 16981:CGTGGAGAACAACCTGTACCCGTTCTGTAACCTCCTCCCAGCGGCAACCTGTTCTCTT 17040  
Tall white sooner milo 16981:CGTGGAGAACAACCTGTACCCGTTCTGTAACCTCCTCCCAGCGGCAACCTGTTCTCTT 17040  
bmr-6 16981:CGTGGAGAACAACCTGTACCCGTTCTGTAACCTCCTCCCAGCGGCAACCTGTTCTCTT 17040  
\*\*\*\*\*

BTx623 17041:CGCCAACGACCGCTCCGTATCTTCGACGCCAAGTCGAGCAAGATCGTGCAGGAGTCCC 17100  
Dwarf white milo 17041:CGCCAACGACCGCTCCGTATCTTCGACGCCAAGTCGAGCAAGATCGTGCAGGAGTCCC 17100  
Tall white sooner milo 17041:CGCCAACGACCGCTCCGTATCTTCGACGCCAAGTCGAGCAAGATCGTGCAGGAGTCCC 17100  
bmr-6 17041:CGCCAACGACCGCTCCGTATCTTCGACGCCAAGTCGAGCAAGATCGTGCAGGAGTCCC 17100  
\*\*\*\*\*

BTx623 17101:CAAGCTCGACGGCGGGAGCCGCAACTACCCCGGTCGCCATGTCGACGCTGTCCCGCT 17160  
Dwarf white milo 17101:CAAGCTCGACGGCGGGAGCCGCAACTACCCCGGTCGCCATGTCGACGCTGTCCCGCT 17160  
Tall white sooner milo 17101:CAAGCTCGACGGCGGGAGCCGCAACTACCCCGGTCGCCATGTCGACGCTGTCCCGCT 17160  
bmr-6 17101:CAAGCTCGACGGCGGGAGCCGCAACTACCCCGGTCGCCATGTCGACGCTGTCCCGCT 17160  
\*\*\*\*\*

BTx623 17161:CGACCTCCGCAACGTACCCGGGACCCGGAGCCGGTGGTGGTATCTGCGGCGGGCGCC 17220  
Dwarf white milo 17161:CGACCTCCGCAACGTACCCGGGACCCGGAGCCGGTGGTGGTATCTGCGGCGGGCGCC 17220  
Tall white sooner milo 17161:CGACCTCCGCAACGTACCCGGGACCCGGAGCCGGTGGTGGTATCTGCGGCGGGCGCC 17220  
bmr-6 17161:CGACCTCCGCAACGTACCCGGGACCCGGAGCCGGTGGTGGTATCTGCGGCGGGCGCC 17220  
\*\*\*\*\*

BTx623 17221:CAAGAAGGCCTTCAGGAAAGGCGAGAACAACACGTTCTGCCGGCGCTCCGCGACTGCGC 17280  
Dwarf white milo 17221:CAAGAAGGCCTTCAGGAAAGGCGAGAACAACACGTTCTGCCGGCGCTCCGCGACTGCGC 17280  
Tall white sooner milo 17221:CAAGAAGGCCTTCAGGAAAGGCGAGAACAACACGTTCTGCCGGCGCTCCGCGACTGCGC 17280  
bmr-6 17221:CAAGAAGGCCTTCAGGAAAGGCGAGAACAACACGTTCTGCCGGCGCTCCGCGACTGCGC 17280  
\*\*\*\*\*

BTx623 17281:CCGCATCAACCTGGCAAGGCCGACGCGCAGTGGGAGAGCGAGGACATGCCCGTGGGCCG 17340  
Dwarf white milo 17281:CCGCATCAACCTGGCAAGGCCGACGCGCAGTGGGAGAGCGAGGACATGCCCGTGGGCCG 17340  
Tall white sooner milo 17281:CCGCATCAACCTGGCAAGGCCGACGCGCAGTGGGAGAGCGAGGACATGCCCGTGGGCCG 17340  
bmr-6 17281:CCGCATCAACCTGGCAAGGCCGACGCGCAGTGGGAGAGCGAGGACATGCCCGTGGGCCG 17340  
\*\*\*\*\*

BTx623 17341:CGTCATGGGCGACATGCTGATCCTCCCCACCGCGACCTGCTGCTGCTCAGCGGCGCCG 17400  
Dwarf white milo 17341:CGTCATGGGCGACATGCTGATCCTCCCCACCGCGACCTGCTGCTGCTCAGCGGCGCCG 17400  
Tall white sooner milo 17341:CGTCATGGGCGACATGCTGATCCTCCCCACCGCGACCTGCTGCTGCTCAGCGGCGCCG 17400  
bmr-6 17341:CGTCATGGGCGACATGCTGATCCTCCCCACCGCGACCTGCTGCTGCTCAGCGGCGCCG 17400  
\*\*\*\*\*

BTx623 17401:CAAGGGCTGCGCCGGTGGGGCTTCGGCAGGCAGCCGGTCTGACCCGATCCTGTACT 17460  
Dwarf white milo 17401:CAAGGGCTGCGCCGGTGGGGCTTCGGCAGGCAGCCGGTCTGACCCGATCCTGTACT 17460  
Tall white sooner milo 17401:CAAGGGCTGCGCCGGTGGGGCTTCGGCAGGCAGCCGGTCTGACCCGATCCTGTACT 17460  
bmr-6 17401:CAAGGGCTGCGCCGGTGGGGCTTCGGCAGGCAGCCGGTCTGACCCGATCCTGTACT 17460  
\*\*\*\*\*

BTx623 17461:GCCGCGCAAGGCGGAGGGCCCGCGTTCCGGGCGCTGGCGTCCACCATCGCGCGAT 17520  
Dwarf white milo 17461:GCCGCGCAAGGCGGAGGGCCCGCGTTCCGGGCGCTGGCGTCCACCATCGCGCGAT 17520  
Tall white sooner milo 17461:GCCGCGCAAGGCGGAGGGCCCGCGTTCCGGGCGCTGGCGTCCACCATCGCGCGAT 17520  
bmr-6 17461:GCCGCGCAAGGCGGAGGGCCCGCGTTCCGGGCGCTGGCGTCCACCATCGCGCGAT 17520  
\*\*\*\*\*

BTx623 17521:GTACCACTCCAGCAGCGCCGTGCTGCCGACGCCACCGTCTGGTGGCCGGCGGCAACGC 17580  
Dwarf white milo 17521:GTACCACTCCAGCAGCGCCGTGCTGCCGACGCCACCGTCTGGTGGCCGGCGGCAACGC 17580  
Tall white sooner milo 17521:GTACCACTCCAGCAGCGCCGTGCTGCCGACGCCACCGTCTGGTGGCCGGCGGCAACGC 17580  
bmr-6 17521:GTACCACTCCAGCAGCGCCGTGCTGCCGACGCCACCGTCTGGTGGCCGGCGGCAACGC 17580  
\*\*\*\*\*

BTx623 17581:CAACGCGGCCTACAACCTCAGCAGCTGGACTTCCCCACCGAGGTGCGCGTGGAGCGGT 17640  
Dwarf white milo 17581:CAACGCGGCCTACAACCTCAGCAGCTGGACTTCCCCACCGAGGTGCGCGTGGAGCGGT 17640  
Tall white sooner milo 17581:CAACGCGGCCTACAACCTCAGCAGCTGGACTTCCCCACCGAGGTGCGCGTGGAGCGGT 17640  
bmr-6 17581:CAACGCGGCCTACAACCTCAGCAGCTGGACTTCCCCACCGAGGTGCGCGTGGAGCGGT 17640  
\*\*\*\*\*

BTx623 17641:CACCCCGCGTACTCAGCGATGATGGGGCCGCGACAACCGCGCGGTGATCGACTTGGC 17700  
Dwarf white milo 17641:CACCCCGCGTACTCAGCGATGATGGGGCCGCGACAACCGCGCGGTGATCGACTTGGC 17700  
Tall white sooner milo 17641:CACCCCGCGTACTCAGCGATGATGGGGCCGCGACAACCGCGCGGTGATCGACTTGGC 17700  
bmr-6 17641:CACCCCGCGTACTCAGCGATGATGGGGCCGCGACAACCGCGCGGTGATCGACTTGGC 17700  
\*\*\*\*\*

BTx623 17701:GTCGTTGCCGTGGACGGGATGCGGTACGGCGCCCGTTCCGTTCCGGTCTCCGTGAC 17760  
Dwarf white milo 17701:GTCGTTGCCGTGGACGGGATGCGGTACGGCGCCCGTTCCGTTCCGGTCTCCGTGAC 17760  
Tall white sooner milo 17701:GTCGTTGCCGTGGACGGGATGCGGTACGGCGCCCGTTCCGTTCCGGTCTCCGTGAC 17760  
bmr-6 17701:GTCGTTGCCGTGGACGGGATGCGGTACGGCGCCCGTTCCGTTCCGGTCTCCGTGAC 17760  
\*\*\*\*\*

BTx623 17761:CTCCGAGCCGGCGGTGGAGGCCGACGTGAAGGTCACCTTTACGCGCCGCGTTTAC 17820  
Dwarf white milo 17761:CTCCGAGCCGGCGGTGGAGGCCGACGTGAAGGTCACCTTTACGCGCCGCGTTTAC 17820  
Tall white sooner milo 17761:CTCCGAGCCGGCGGTGGAGGCCGACGTGAAGGTCACCTTTACGCGCCGCGTTTAC 17820  
bmr-6 17761:CTCCGAGCCGGCGGTGGAGGCCGACGTGAAGGTCACCTTTACGCGCCGCGTTTAC 17820  
\*\*\*\*\*

BTx623 17821:CACGCACGGTGTCTTCCATGAACAGCGGCTGCTGATCCTGCACCTTACCTCGTACGTCCA 17880  
Dwarf white milo 17821:CACGCACGGTGTCTTCCATGAACAGCGGCTGCTGATCCTGCACCTTACCTCGTACGTCCA 17880  
Tall white sooner milo 17821:CACGCACGGTGTCTTCCATGAACAGCGGCTGCTGATCCTGCACCTTACCTCGTACGTCCA 17880  
bmr-6 17821:CACGCACGGTGTCTTCCATGAACAGCGGCTGCTGATCCTGCACCTTACCTCGTACGTCCA 17880  
\*\*\*\*\*

BTx623 17881:GGAGGGACGGAGCTACAGGGTGTGCTGGACGGGCCGGCAAGCCGGAGCTAGCGCCGCG 17940  
Dwarf white milo 17881:GGAGGGACGGAGCTACAGGGTGTGCTGGACGGGCCGGCAAGCCGGAGCTAGCGCCGCG 17940  
Tall white sooner milo 17881:GGAGGGACGGAGCTACAGGGTGTGCTGGACGGGCCGGCAAGCCGGAGCTAGCGCCGCG 17940  
bmr-6 17881:GGAGGGACGGAGCTACAGGGTGTGCTGGACGGGCCGGCAAGCCGGAGCTAGCGCCGCG 17940  
\*\*\*\*\*

BTx623 17941:GGGGTACTACTGCTGTTCTGCTGCGCAAGGGCGTCCGAGCGTCCGGTGTGGGTGAA 18000  
Dwarf white milo 17941:GGGGTACTACTGCTGTTCTGCTGCGCAAGGGCGTCCGAGCGTCCGGTGTGGGTGAA 18000  
Tall white sooner milo 17941:GGGGTACTACTGCTGTTCTGCTGCGCAAGGGCGTCCGAGCGTCCGGTGTGGGTGAA 18000  
bmr-6 17941:GGGGTACTACTGCTGTTCTGCTGCGCAAGGGCGTCCGAGCGTCCGGTGTGGGTGAA 18000  
\*\*\*\*\*

Figure S4 (page25)

|                        |                                       |       |
|------------------------|---------------------------------------|-------|
| BTx623                 | 18001:GGTTTGGTGAGATCGATCGGCCGATCGTTGG | 18031 |
| Dwarf white milo       | 18001:GGTTTGGTGAGATCGATCGGCCGATCGTTGG | 18031 |
| Tall white sooner milo | 18001:GGTTTGGTGAGATCGATCGGCCGATCGTTGG | 18031 |
| bmr-6                  | 18001:GGTTTGGTGAGATCGATCGGCCGATCGTTGG | 18031 |
|                        | *****                                 |       |

**Supplementary Figure S4 | Sequence comparison of the candidate region among cultivars.** Sequences of the candidate region (~18kb) of the four cultivars, BTx623, Dwarf White Milo, Tall White Sooner Milo, and bmr-6 were compared. Asterisk and period indicate the same and different nucleotides, respectively. The nucleotide position at 2057 indicates dw1 mutation (shown as a red arrowhead). Three genomic sequences (Dwarf White Milo, Tall White Sooner Milo, and bmr-6) were determined by resequencing (Illumina Hiseq 2000).

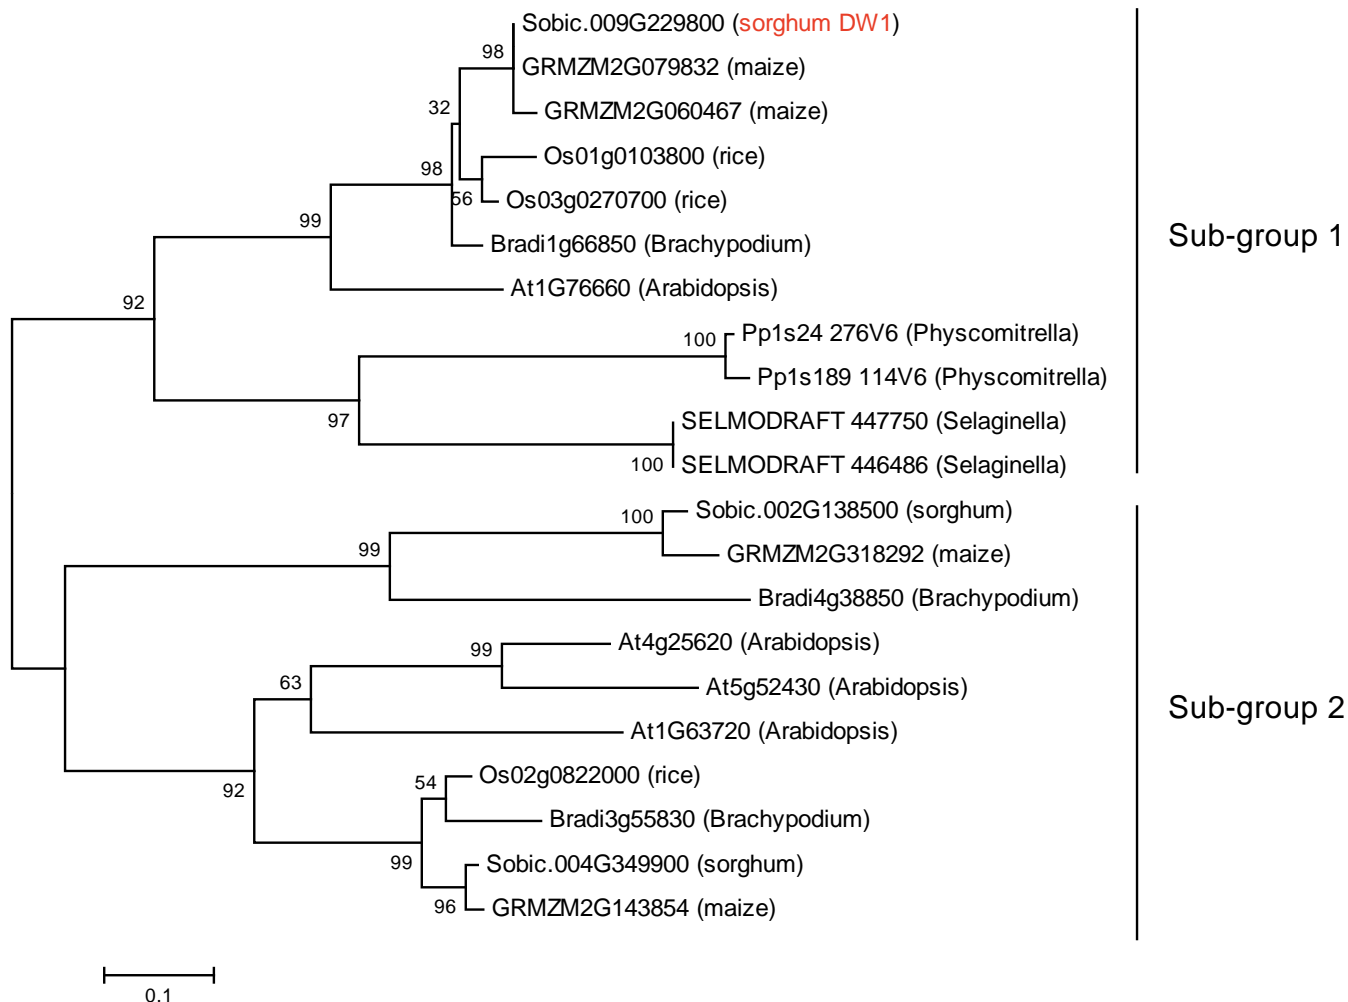

**Supplementary Figure S5 | Phylogenetic analysis of DW1.** DW1 homologs of *Oryza sativa* (rice), *Arabidopsis thaliana* (Arabidopsis), *Zea mays* (maize), *Brachypodium distachyon* (Brachypodium), *Physcomitrella patens* (Physcomitrella), and *Selaginella moellendorffii* (Selaginella) were used for this analysis. Numbers at the branches are bootstrap values. The horizontal branch lengths are proportional to the estimated number of amino acid substitutions per residue. The DW1 homologs in seed plants are divided into two sub-groups, and the homologs in ferns and mosses are in subgroup I.



Domain I

|                                 |   |                                                                   |
|---------------------------------|---|-------------------------------------------------------------------|
| SELMODRAFT_447750 (Selaginella) | 1 | -----MANTDNQGNVVPQRDP                                             |
| SELMODRAFT_446486 (Selaginella) | 1 | -----MANTDNQGNVVPQRDP                                             |
| Pp1s24_276V6 (Physcomitrella)   | 1 | -----                                                             |
| Pp1s189_114V6 (Physcomitrella)  | 1 | -----                                                             |
| At1G76660 (Arabidopsis)         | 1 | -----MGS                                                          |
| Bradi1g66850 (Brachypodium)     | 1 | -----MATPGSSITGGGSSSTRAANGAVAI SAAATAAGSADARF-----SQPPH           |
| Os01g0103800 (rice)             | 1 | -----MAATPGSSRPAN-----VAAAAATEARF-----SHPPQ                       |
| Os03g0270700 (rice)             | 1 | PEQPRLQIRKGYSRGATGAVVARGSSSTRPANGAVAI NAAAPAVGSAPAEVARF-----SQPPQ |
| GRMZM2G060467 (maize)           | 1 | -----MSSVGRSNGTRAANGAAAISTSTTEAGSADARF-----SCLLH                  |
| Sobic.009G229800 (sorghum DW1)  | 1 | -----MSSVGSSPGTRAANGAAAISAAATAAGSADARF-----SCLLQ                  |
| GRMZM2G079832 (maize)           | 1 | -----MSSVGSNGTRAANGAAAISAAATAAGSADARF-----PCLLQ                   |
| Bradi4g38850 (Brachypodium)     | 1 | -----MDESVHTVNAAAVVLAAAARSTGLHRHHNHLQQQLL-----DDHAT               |
| Sobic.002G138500 (sorghum)      | 1 | -----MQRQDDDDTVHAAAVLAAAARSTS-----TGLLRHQQLDD-----DHASC           |
| GRMZM2G318292 (maize)           | 1 | -----                                                             |
| At1G63720 (Arabidopsis)         | 1 | -----MRSGANGNNVFDITNAAASAIASSD-----DRLHQSS                        |
| At4g25620 (Arabidopsis)         | 1 | -----MRSVNNSSVDTVNAASAVSAE-----SRTCPSS                            |
| At5g52430 (Arabidopsis)         | 1 | -----MRNVVNSVETVNAATAIVTAE-----SRTCPSS                            |
| Bradi3g55830 (Brachypodium)     | 1 | -----MQSGGEMRPVHNSVDTVNAAAAAISAE-----SRTALPTD                     |
| Os02g0822000 (rice)             | 1 | -----MQSGSEM RPVHNSVDTVNAAAVAIVTAE-----SRTCPQA                    |
| Sobic.004G349900 (sorghum)      | 1 | -----MQSGGEMRPVHNSVDTVNAAAVAIVTAE-----SRTCPQA                     |
| GRMZM2G143854 (maize)           | 1 | -----MQSGGDMRPVHNSVDTVNAAAVAIVTAE-----SRTCPQA                     |

Intron I      Domain II

|                                 |    |                                                                     |
|---------------------------------|----|---------------------------------------------------------------------|
| SELMODRAFT_447750 (Selaginella) | 17 | SPELQQRQKCKY GKFVCLGSS-RKRGMRICPARQEGPA-----SITNAWTNGASSSTAANQF     |
| SELMODRAFT_446486 (Selaginella) | 17 | SPELQQRQKCKY GKFVCLGSS-RKRGMRICPARQEGPA-----SITNAWTNGASSSTAANQF     |
| Pp1s24_276V6 (Physcomitrella)   | 1  | -----MARGGCCWSGPFCLGSLSRKNKKRIVPAIRVHDG-----TAQPSDPQ                |
| Pp1s189_114V6 (Physcomitrella)  | 1  | -----MARGGCCWSGPFCLGSLSRKNKKRIVPAIRVHDG-----TAQPSDPQ                |
| At1G76660 (Arabidopsis)         | 4  | EQDQRKRWGGCLGVFSCFKSC-----KGGKRIVPASRIPEGGNVS-----SQPNGAHQAGVLLNCAA |
| Bradi1g66850 (Brachypodium)     | 45 | Q-DRQSRWAGCF SGLSCFGSC-----KGGKRIVPAARIPDG-----NSTNRGNALQSGGNSNQ    |
| Os01g0103800 (rice)             | 30 | Q-DRRSGWAGCL SGLSCFGSC-----KGGKRIVPAARIPDG-----NSTSRGNAHQSGANSQS    |
| Os03g0270700 (rice)             | 61 | Q-DRQSRWAGCF SALS CFGSC-----KGGKRIVPAARIPDG-----NSTSRGNAHQSGSNSNQ   |
| GRMZM2G060467 (maize)           | 40 | Q-DRQSRWAGCF SGLSCFGSC-----KGGKRIVPAARTSDG-----NCSNTRGNLQSGANSNQ    |
| Sobic.009G229800 (sorghum DW1)  | 40 | Q-DRQSRWAGCF SGLSCFGSC-----KGGKRIVPAARTSDG-----NCSNARGN-GQSGANSNQ   |
| GRMZM2G079832 (maize)           | 40 | QDRQSRWAGCF SGLSCFGSC-----KGGKRIVPAARTSDG-----NCSNARGNGLQSGANSNQ    |
| Bradi4g38850 (Brachypodium)     | 44 | AATRKRIRWWSRLKAKLCFRPPHVHP-RR IADASSSSP-----QPATYSVHHA              |
| Sobic.002G138500 (sorghum)      | 45 | AAAKKTRIRWWSRLKSKLKMFRPHGHP-QRIADASRSPEPGAPPQAEQAAGSSSINNYARHA      |
| GRMZM2G318292 (maize)           | 1  | -MQKKTRIRWWSRLKAKLKSFRPHGHP-QRIADASRSPEPPGAPQAEQAPGS-----YNYARHA    |
| At1G63720 (Arabidopsis)         | 33 | PIHKKRKWNRIW SLLKCFGSSRQFK-----RIGNSVLVPEP-----VSMSSSNSTTSNSGYRS    |
| At4g25620 (Arabidopsis)         | 31 | -VQK-KRGSWISLYWCFGSKKNNK-----RIGHAVLVPEP-----AASGAAVAPVQNSSNS       |
| At5g52430 (Arabidopsis)         | 31 | -SQKGRWGGKNSLYSCFGTKNNK-----RIGNAVLVPEP-----VTSQVPPVTVQNSATS        |
| Bradi3g55830 (Brachypodium)     | 36 | -EPRRKWADWLSAYFCFGSQKNGR-----RISHAVLVPEP-----ASQR-IDATVPEIPVHQ      |
| Os02g0822000 (rice)             | 36 | -EPRRKWADWLSVYFCFGSQKNGR-----RISHAVLVPEP-----LPPR-TDAPMPEIPVHP      |
| Sobic.004G349900 (sorghum)      | 36 | -EPRRKWADRLSAYFCFGSQKNGRRMRVNHAAALVPEP-----APQR-TDAPVAEIPVHP        |
| GRMZM2G143854 (maize)           | 36 | -EQRRKWADRLS VYFCFGSQKNGRRMRVNHAAALVPEP-----APQR-TDAPAAEIPVHP       |



## Domain III

|                                 |     |        |                |                |                   |         |              |          |           |          |           |
|---------------------------------|-----|--------|----------------|----------------|-------------------|---------|--------------|----------|-----------|----------|-----------|
| SELMODRAFT_447750 (Selaginella) | 73  | VG     | SPS            | LLAPPSSPAS     | FANSGNPSTVQSPAS   | FTVSLC  | VPAASSCSPAFD | STATMFT  | IGPY      |          |           |
| SELMODRAFT_446486 (Selaginella) | 73  | VG     | SPS            | LLAPPSSPAS     | FANSGNPSTVQSPAS   | FTVSLC  | VPAASSCSPAFD | STATMFT  | IGPY      |          |           |
| Pp1s24_276V6 (Physcomitrella)   | 43  | -GQFA  | LLAPPSSPAS     | YANSMA         | PSSVQSPY-YPSSCPVP | QGGGSR  | IPLETQSNM    | FVAVGPY  |           |          |           |
| Pp1s189_114V6 (Physcomitrella)  | 43  | -GQFA  | LLAPPSSPAS     | YANSMA         | PSSVQSPY-YPSSCPVP | QGGGSR  | IPLETQSNM    | FVAVGPY  |           |          |           |
| At1G76660 (Arabidopsis)         | 62  | GG     | IN             | LSLLAPPSSPAS   | FTNSALPSTTQSPNCYL | LSLAANS | PPGG-----    | PSSSMYAT | IGPY      |          |           |
| Bradi1g66850 (Brachypodium)     | 99  | GA     | N              | LSLLAPPSSPAS   | FNSALPSTAQSPNCF   | LSISANS | PPGG-----    | PTS      | NMFVAVGPY |          |           |
| Os01g0103800 (rice)             | 84  | AA     | N              | LSLLAPPSSP     | YFSNSAIPSTAQSPNCF | LSISANS | PPGG-----    | PTS      | NMFVAVGPY |          |           |
| Os03g0270700 (rice)             | 115 | VA     | N              | LSLLAPPSSPAS   | FNSAIPSTAQSPNRF   | LSISANS | PPGG-----    | PTS      | NMFVAVGPY |          |           |
| GRMZM2G060467 (maize)           | 94  | LP     | N              | LSLLAPPSSPAS   | FNSALPSTAQSPNCF   | LSVSANS | PPGG-----    | PTS      | NMFVAVGPY |          |           |
| Sobic.009G229800 (sorghum DW1)  | 93  | MP     | N              | LSLLAPPSSPAS   | FNSALPSTAQSPNCF   | LSVSANS | PPGG-----    | PTS      | NMFVAVGPY |          |           |
| GRMZM2G079832 (maize)           | 95  | MP     | N              | LSLLAPPSSPAS   | FNSALPSTAQSPNCF   | LSVSANS | PPGG-----    | PTS      | NMFVAVGPY |          |           |
| Bradi4g38850 (Brachypodium)     | 92  | PQPVFA | FVAPPSSPA      | TISLLHS-----   | EAPSP             | PALLGG  | -----        | HGINS    | PS        | RFVAVGPY |           |
| Sobic.002G138500 (sorghum)      | 104 | PQPA   | AVFVAPPSSPA    | SSVLT-----     | ESPSP             | VLLNAN  | ACSSSYSSP    | -----    | TAS       | IFVAVGPY |           |
| GRMZM2G318292 (maize)           | 56  | PQPT   | AVFVAPP        | SPATISVLT----- | ESPSP             | VLLNAN  | -----        | ASSYSSP  | -----     | TAS      | IFVAVGPY  |
| At1G63720 (Arabidopsis)         | 86  | VIT    | LPFIAPPSSPAS   | FFQSEPPSA      | TQSP-----         | VGILSF  | SPLPCNN      | -----    | RPS       | IFVAVGPY |           |
| At4g25620 (Arabidopsis)         | 81  | TS     | IFLPFIAPPSSPAS | FLPSGPPSASH    | TP-----           | DPGL    | LLCS-----    | LTVNE    | -----     | PPS      | AFTVAVGPY |
| At5g52430 (Arabidopsis)         | 81  | TT     | VLPFIAPPSSPAS  | FLQSDPSSVSH    | SP-----           | VGPL    | SLTSNTF      | SPKE     | -----     | PQS      | VFTVAVGPY |
| Bradi3g55830 (Brachypodium)     | 86  | PPPVF  | PFVAPPSSPAS    | FLQSGSAS       | IVQSP-MGAP        | SFSPR   | SPNSP        | SPSG     | -----     | TPS      | IFVAVGPY  |
| Os02g0822000 (rice)             | 86  | PPPVF  | PFVAPPSSPAS    | FLQSGGAS       | IVQSP-VGAP        | SFSP    | SPLSPNS      | SPTG     | -----     | PPS      | IFVAVGPY  |
| Sobic.004G349900 (sorghum)      | 88  | PPPVF  | PFVAPPSSPAS    | FLQSEPT        | SIVQSPRVG         | APP     | SPLSPNS      | QSPAG    | -----     | TPS      | IFVAVGPY  |
| GRMZM2G143854 (maize)           | 88  | PPPVF  | PFVAPPSSPAS    | FLQSEPT        | SIVQSPRAG         | AP      | SPLSPNS      | QSPAG    | -----     | PPS      | IFVAVGPY  |

## Domain IV

|                                 |     |      |         |          |          |         |        |       |       |            |         |       |       |       |       |
|---------------------------------|-----|------|---------|----------|----------|---------|--------|-------|-------|------------|---------|-------|-------|-------|-------|
| SELMODRAFT_447750 (Selaginella) | 133 | AHET | ILVTPP  | -AFSAFT  | -----    | TAPSTAP | FTPPP  | ----- | ELAH  | ITTPSSPDV  | PF      | AQLL  | TS    | ----- | LKN   |
| SELMODRAFT_446486 (Selaginella) | 133 | AHET | ILVTPP  | -AFSAFT  | -----    | TAPSTAP | FTPPP  | ----- | ELAH  | ITTPSSPDV  | PF      | AQLL  | TS    | ----- | LKN   |
| Pp1s24_276V6 (Physcomitrella)   | 101 | AHET | ALVSPP  | -VFSTFT  | -----    | TAPSTAP | FTPPPE | ----- | LAHF  | ITTPSSPDV  | PF      | AKLL  | GSS   | ----- | FSE   |
| Pp1s189_114V6 (Physcomitrella)  | 101 | AHET | ALVSPP  | -VFSTFT  | -----    | TAPSTAP | FTPPPE | ----- | LAHF  | ITTPSSPDV  | PF      | AKLL  | ASS   | ----- | FS    |
| At1G76660 (Arabidopsis)         | 115 | AHET | CLVSPP  | -VFSTFT  | -----    | TEPSTAP | FTPPP  | ----- | ELAR  | LITTPSSPDV | PF      | ARFL  | TSS   | ----- | DL    |
| Bradi1g66850 (Brachypodium)     | 152 | ANEP | CLVSPP  | TAFTSTYT | -----    | TEPSTAP | LTPPP  | ----- | ELAH  | ATTPSSPDV  | PF      | ARFL  | SSS   | ----- | GL    |
| Os01g0103800 (rice)             | 137 | ANEP | CLVSPP  | -VFSTYT  | -----    | TEPSTAP | LTPPP  | ----- | ELAH  | ATTPSSPDV  | PF      | ARFL  | S     | ----- | DL    |
| Os03g0270700 (rice)             | 168 | ANEP | CLVSPP  | -VFSTYT  | -----    | TEPSTAP | LTPPP  | ----- | EL    | ITTPSSPDV  | PF      | ARFL  | S     | ----- | DL    |
| GRMZM2G060467 (maize)           | 147 | ANEP | CLVSPP  | -VFSTYT  | -----    | TEPSTAP | LTPPP  | ----- | ELAH  | ATTPSSPDV  | PF      | ARFL  | SSS   | ----- | GI    |
| Sobic.009G229800 (sorghum DW1)  | 146 | ANEP | CLVSPP  | -VFSTYT  | -----    | TEPSTAP | LTPPP  | ----- | ELAH  | ATTPSSPDV  | PF      | ARFL  | SSS   | ----- | DI    |
| GRMZM2G079832 (maize)           | 148 | ANEP | CLVSPP  | -VFSTYT  | -----    | TEPSTAP | LTPPP  | ----- | ELAH  | ATTPSSPDV  | PF      | ARFL  | SSS   | ----- | DI    |
| Bradi4g38850 (Brachypodium)     | 142 | AHGP | QQLVSPP | MLYSAFT  | TEPSSASL | TPPADL  | HLLA   | AATTN | PSSPE | VPFAR      | FLAS    | STSM  | ----- | ----- | ----- |
| Sobic.002G138500 (sorghum)      | 157 | AREP | QQLVSPP | AFSASAGL | TEPSTAP  | VITPPPE | SGLH   | LATT  | PSSPE | VPFAR      | FLISS   | AA    | ----- | ----- | ----- |
| GRMZM2G318292 (maize)           | 106 | AREP | QQLVSPP | AFSASAGL | TEPSTAP  | LTPPPE  | SSLQ   | LATT  | PSSPE | VPFAR      | FLISS   | AA    | ----- | ----- | ----- |
| At1G63720 (Arabidopsis)         | 138 | AHET | -QLVSPP | VFSTYT   | -----    | TEPSSAP | ITPP   | LDSS  | IYLT  | TTTPSSPE   | VPFAR   | FLFN  | ----- | ----- | ----- |
| At4g25620 (Arabidopsis)         | 132 | AHET | -QPVT   | PPVFAFT  | -----    | TEPSTAP | FTPPPE | ----- | ----- | PSSPE      | VPFAR   | FLISS | ER    | ----- | ----- |
| At5g52430 (Arabidopsis)         | 135 | ANET | -QPVT   | PPVFAFT  | -----    | TEPSTAP | YTPPPE | ----- | VH    | ITTPSSPE   | VPFAR   | FLISS | EL    | ----- | ----- |
| Bradi3g55830 (Brachypodium)     | 143 | AHET | -QLVSPP | VFSAFT   | -----    | TEPSTAP | FTPPPE | ----- | VH    | ITTPSSPE   | VPYAKLL | TS    | LNSS  | ----- | ----- |
| Os02g0822000 (rice)             | 143 | AHET | -QLVSPP | VFSAFT   | -----    | TEPSTAP | FTPPPE | ----- | VH    | ITTPSSPE   | VPYAKLL | TS    | INNS  | ----- | ----- |
| Sobic.004G349900 (sorghum)      | 146 | AHET | -QLVSPP | VFSAFT   | -----    | TEPSTAP | FTPPPE | ----- | VH    | ITTPSSPE   | VPYAKLL | TS    | INNS  | ----- | ----- |
| GRMZM2G143854 (maize)           | 146 | AHET | -QLVSPP | VFSAFT   | -----    | TEPSTAP | FTPPPE | ----- | VH    | ITTPSSPE   | VPYAKLL | TS    | INNS  | ----- | ----- |



stop

v

Domain V

SELMODRAFT\_447750 (Selaginella) 185 KGAVAGGAAPPYSASPFASPDYVSR----GDMQPSYHLYPESPLTSLI SPASGVSES--  
 SELMODRAFT\_446486 (Selaginella) 185 KGAVAGGAAPPYSASPFASPDYVSR----GDMQPSYHLYPESPLTSLI SPASGVSES--  
 Pp1s24\_276V6 (Physcomitrella) 155 QRTTKREAEPYSASPFASPDYQDHPQDDLVQVGYQLYPGSPGLRLI SPAGTTGASTP  
 Pp1s189\_114V6 (Physcomitrella) 155 QRSTKREPEPPYSASPFASPDYQDHSQQDDLVQVGYQLYAGSPLGGLI SPAGTTGESTP  
 At1G76660 (Arabidopsis) 168 K-----NSGKGHYN-----DLQATYSLYPGSPASALRSPISRASGD--  
 Bradi1g66850 (Brachypodium) 206 K-----TAGKEHNMHYLSTAYSGGSGLQGSYPLYPGSPSSSLI SPASATPRT--  
 Os01g0103800 (rice) 190 K-----TAGKDHNMPYLSTAYSGGSGLQASYPLYPESPPSSLI SPASATPRT--  
 Os03g0270700 (rice) 221 K-----TAGKDHNMPYLSTAYSGGSGLQASYPLYPESPPSSLI SPASATPRT--  
 GRMZM2G060467 (maize) 200 K-----TASKDHNMPFLSTTYSGGSGLQTSYPLYPESPCSSLI SPASVTPRT--  
 Sobic.009G229800 (sorghum DW1) 199 K-----TASKEHNMPFLSTAYSGGSGLQASYPLYPESPCSSLI SPASVTPRT--  
 GRMZM2G079832 (maize) 201 K-----TASKEHNMPFLSTTYSGGSGLQASYPLYPESPCSSLI SPASVTPRT--  
 Bradi4g38850 (Brachypodium) 202 AEQQSCGGL-----LQAAYQLQPGSPITPP-----  
 Sobic.002G138500 (sorghum) 216 DQQPHCSPG-----GMVTEGFLHAYQLQPGSPVLV-----  
 GRMZM2G318292 (maize) 165 DQQAHCFGGG-----TGTGTGTASDGLHAYQLQPGSPVLK-----  
 At1G63720 (Arabidopsis) 190 SNHQTGSYGY-----K-FPMSSSYEFQFYQLPPGSPGLG-----  
 At4g25620 (Arabidopsis) 180 ARRNSGGGMN-----Q-KFSAAHYEFKSCQYYPGSPGG-NIISPG-----  
 At5g52430 (Arabidopsis) 189 TRRDSTSGMN-----Q-KFSSSHYEFRSNQYCPGSPGGGN-IISPGSVISN--  
 Bradi3g55830 (Brachypodium) 196 KNGERG-----ELHPYHLYPESPIG-----RLISP--  
 Os02g0822000 (rice) 196 KNAETG-----ELQSYQLYPESPIG-----RLISP--  
 Sobic.004G349900 (sorghum) 199 KNGETG-----DLQSYPNYPDSPIG-----RLISP--  
 GRMZM2G143854 (maize) 199 KNGEAGG-----DLQSYPNYPDSPIG-----RLISP--

SELMODRAFT\_447750 (Selaginella) 238 -----GPPSPLPELEFFAAITAAKAAKATS----VRLAVSLCDRRVRLGHETPRSLD  
 SELMODRAFT\_446486 (Selaginella) 238 -----GPPSPLPELEFFAAITAAKAAKATS----VRLAVSLCDRRVRLGHETPQSLD  
 Pp1s24\_276V6 (Physcomitrella) 215 FAAGGTTGTNTPHAESDNP TPLTVLPAVVSTLPNLEHQVAEGLHQRSILDSQCGPGEPLS  
 Pp1s189\_114V6 (Physcomitrella) 215 FAGRGTIGTNTPHAEGDNP TPLTVLPAVVSTLPNLEHQVAEGLHQRSILDSQCGPGEPLN  
 At1G76660 (Arabidopsis) 204 -----GLLSPO-----NGK  
 Bradi1g66850 (Brachypodium) 253 -----GLSSPIPEQVPTAHWKTSRSACDTPYSIASPIPEQEVPTAQWKTSRSACDTP  
 Os01g0103800 (rice) 237 -----GLSSPIPEQVPTAHWKTSRSACDTPYSRASPIPEQEVCTAHWKTSRSACDTP  
 Os03g0270700 (rice) 268 -----GLSSPIPEQVPTAHWKTSRSACDTPYSRASPIPEQEVPTAQWKTSRSACDTP  
 GRMZM2G060467 (maize) 247 -----GLSSPIPEQVPTAHWKTSRSACDTPYFRASPIPEQ-ETTAQWKTSRSACDTP  
 Sobic.009G229800 (sorghum DW1) 246 -----GLSSPIPEQVPTAHWKTSRSACDTPYFRASPIPEQ-ETTAQWKTSRSACDTP  
 GRMZM2G079832 (maize) 248 -----GLSSPIPEQVPTAHWKTSRSACDTPYFRASPIPEQ-ETTAQWKTSRSACDTP  
 Bradi4g38850 (Brachypodium) 226 -----GVSPSPSPQPFRRKLHRRNEGSLLDGHIPLVLTSGAGA-----  
 Sobic.002G138500 (sorghum) 246 -----SPGSTSSSPPPWNMQQHVVGTHSDGGRVPIKDE-----  
 GRMZM2G318292 (maize) 201 -----SPG-----  
 At1G63720 (Arabidopsis) 222 -----QLISPSFGSGPTSPFPDGETSLFPHFQVSDPPKLLSPKTAGVITPCKE-----  
 At4g25620 (Arabidopsis) 218 -----SGTSSYPYPKGCSIIEFRIGEPKFLGFEHFTARKWGSRFSGSITPVGHGSRGLG  
 At5g52430 (Arabidopsis) 233 -----SGTSSYPYPKSMPVEFRIGEPKFLGFEHFTARKWGSRFSGSITPVGHGSRGLA  
 Bradi3g55830 (Brachypodium) 221 -----SSVCSGTSSFPDPELQTSSTCFPSFPVREPPKILDGEGVATQKLI PRHMRNG  
 Os02g0822000 (rice) 221 -----SSACSGTSSFPDPEVQTSSTCFPSFPVREPPKILDGEGVATQKLI PRHMRNG  
 Sobic.004G349900 (sorghum) 224 -----SSGCSGTSSFPDPEMLASSSALHSFPVREPPKILDGEGVATQKLI PRHMRNG  
 GRMZM2G143854 (maize) 225 -----SSGCSGTSSFPDPEMQASSSALRLFPVREPPKILDGEGVATQKLI PRHMRNG

|                                 |       |                        |                     |                                 |                 |        |           |         |      |
|---------------------------------|-------|------------------------|---------------------|---------------------------------|-----------------|--------|-----------|---------|------|
| SELMODRAFT_447750 (Selaginella) | 287   | SNNHSRELEPIKILSPPRGQYE | ERWCSRTL            | DSCSTSSNAVAATKSMEELPRRSHSCG     | ---             |        |           |         |      |
| SELMODRAFT_446486 (Selaginella) | 287   | SNNHSRELEPIKILSPPRGQYE | ERWCSRTL            | DSCSTSSNAVAATKSMEELPRRSHSCG     | ---             |        |           |         |      |
| Pp1s24_276V6 (Physcomitrella)   | 275   | DSGRERHGSFDSHSRFMVAM   | IHERDGS             | SDSNSNSYGHERYSGSLTGLNDVLEGRNRYT | ---             |        |           |         |      |
| Pp1s189_114V6 (Physcomitrella)  | 275   | DSGRERHGSFDSHSRFMGAM   | IHERDPS             | SDSASHSYGHEQHSGLSGLHEVLEGRNRHR  | ---             |        |           |         |      |
| At1G76660 (Arabidopsis)         | 213   | CSRSDSGNTFFGYDTNGVSTPL | QESNFF              | CPETF                           | AKFYLDHDP       | SVPQNG | ---       | GRLSVSK | DSDV |
| Bradi1g66850 (Brachypodium)     | 306   | YSRTSPSNIFGLDSAAPRNC   | LDSNFF              | FRPAASAQFYLDQAQQT               | FPYN            | ---    | GGRLSVSRD | ---     |      |
| Os01g0103800 (rice)             | 290   | YSRNPSNIFGLDSAASRNYM   | LDSNFF              | FRPAASAQFYLDQAQQS               | FPYNN           | ---    | GGRLSVSKD | ---     |      |
| Os03g0270700 (rice)             | 321   | YSRNPSNIFGLDSAASRNYM   | LDSNFF              | FRPAASAQFYLDQAQQS               | FPYNN           | ---    | GGRLSVSRD | ---     |      |
| GRMZM2G060467 (maize)           | 299   | YARTSPTNIFGLDSSTPRNYM  | LDSNFF              | FRPAASAQFYLDQAQQT               | FPHN            | ---    | GGRVSVSRE | ---     |      |
| Sobic.009G229800 (sorghum DW1)  | 298   | YARNSTNIFGLDSSTPRNYM   | LDSNFF              | FRPAASAQFYLDQAQQT               | FPHN            | ---    | GGRVSVSRE | ---     |      |
| GRMZM2G079832 (maize)           | 300   | YARTSPTNIFGLDSNTPRNYM  | LDSNFF              | FRPAASAQFYLDQAQQA               | FPHN            | ---    | GGRVSVSRE | ---     |      |
| Bradi4g38850 (Brachypodium)     | 264   | -----                  | -----               | -----                           | -----           | -----  | -----     | -----   |      |
| Sobic.002G138500 (sorghum)      | 280   | -----                  | -----               | -----                           | -----           | -----  | -----     | -----   |      |
| GRMZM2G318292 (maize)           | ----- | -----                  | -----               | -----                           | -----           | -----  | -----     | -----   |      |
| At1G63720 (Arabidopsis)         | 270   | -----                  | -----               | -----                           | -----           | -----  | -----     | -----   |      |
| At4g25620 (Arabidopsis)         | 272   | SGALTPDGSKLTS          | GVVTPNGAETVIRMSYGNL | TPLEGSLLDSQISEVASLANSDHGSSR     | ---             |        |           |         |      |
| At5g52430 (Arabidopsis)         | 287   | SGALTPNGPEIVSGNLTPN    | -----               | NTTWPLQ                         | NQISEVASLANSDHG | ---    |           |         |      |
| Bradi3g55830 (Brachypodium)     | 275   | GSLLDGHI               | AAVPVDF             | SARLQ                           | ---             |        |           |         |      |
| Os02g0822000 (rice)             | 275   | GSLLDGHI               | AAVPVDF             | SARLQ                           | ---             |        |           |         |      |
| Sobic.004G349900 (sorghum)      | 278   | GSLLDGHI               | AAVPVDF             | SARLQ                           | ---             |        |           |         |      |
| GRMZM2G143854 (maize)           | 279   | GSLLDGQI               | AAVPVDF             | SARLQ                           | ---             |        |           |         |      |

Domain VI

|                                 |       |                        |       |                    |          |             |             |           |       |
|---------------------------------|-------|------------------------|-------|--------------------|----------|-------------|-------------|-----------|-------|
| SELMODRAFT_447750 (Selaginella) | 344   | -----                  | GID   | LEVELKRSL          | SQV      | GALPRGGDDDD | RADADVDTM   | VVEDSQ    |       |
| SELMODRAFT_446486 (Selaginella) | 344   | -----                  | GID   | LEVELKRSL          | SQV      | GALPRGGDDDD | RADADVDTM   | VVEDSQ    |       |
| Pp1s24_276V6 (Physcomitrella)   | 332   | -----                  | KLK   | QDKGPRSS           | SLRSHEKE | ---         | DDIQEEDLLEL | PMLLGSESS |       |
| Pp1s189_114V6 (Physcomitrella)  | 332   | -----                  | KLN   | QDKSSRFITGLKTQEQEK | DDV      | RNEDLLEL    | PMLLGSESS   |           |       |
| At1G76660 (Arabidopsis)         | 271   | YPTNGYGNGNQNRQNRSPKQDM | EEL   | EAYRASFGFS         | SADEI    | ITTSQYVEITD | VMDG        | SFN       | TS    |
| Bradi1g66850 (Brachypodium)     | 362   | -----                  | KQDA  | EVEAYRASFGFS       | SADEI    | VTTQHYA     | IPD         | LDDG      | F     |
| Os01g0103800 (rice)             | 347   | -----                  | KQDV  | EVEAYRASFGFS       | SADEI    | VTTQTYVE    | IPD         | ALDE      | G     |
| Os03g0270700 (rice)             | 378   | -----                  | KQDA  | EVEAYRASFGFS       | SADEI    | VTTQAYVE    | IPD         | ALDE      | G     |
| GRMZM2G060467 (maize)           | 355   | -----                  | KQGA  | EIEAYRASFGFS       | SADEI    | VQSQSYVG    | IPDA        | VDES      | F     |
| Sobic.009G229800 (sorghum DW1)  | 354   | -----                  | KQDA  | EIEAYRASFGFS       | SADEI    | VQSQSYVG    | IPDA        | VDES      | F     |
| GRMZM2G079832 (maize)           | 356   | -----                  | KQDA  | EIEAYRASFGFS       | SADEI    | VQSQSYVG    | IPDA        | VDES      | F     |
| Bradi4g38850 (Brachypodium)     | 264   | -----                  | ----- | -----              | -----    | -----       | -----       | -----     | ----- |
| Sobic.002G138500 (sorghum)      | 280   | -----                  | ----- | -----              | -----    | -----       | -----       | -----     | ----- |
| GRMZM2G318292 (maize)           | ----- | -----                  | ----- | -----              | -----    | -----       | -----       | -----     | ----- |
| At1G63720 (Arabidopsis)         | 270   | -----                  | QKIV  | RP                 | HKPV     | SF          | DL          | AD        | HV    |
| At4g25620 (Arabidopsis)         | 331   | -----                  | HN    | DEAL               | WPHR     | VS          | FELT        | GEDV      | ARCL  |
| At5g52430 (Arabidopsis)         | 328   | -----                  | SE    | VM                 | VADH     | RV          | SFELT       | GEDV      | ARCL  |
| Bradi3g55830 (Brachypodium)     | 297   | -----                  | SND   | H                  | AM       | DH          | RV          | SFELT     | V     |
| Os02g0822000 (rice)             | 297   | -----                  | NND   | H                  | AM       | DH          | RV          | SFELT     | V     |
| Sobic.004G349900 (sorghum)      | 300   | -----                  | PNE   | H                  | AM       | DH          | RV          | SFELT     | V     |
| GRMZM2G143854 (maize)           | 301   | -----                  | PNE   | H                  | AM       | DH          | RV          | SFELT     | V     |



|                                 |       |                                                               |
|---------------------------------|-------|---------------------------------------------------------------|
| SELMODRAFT_447750 (Selaginella) | 384   | QPTSALLRG-----GDDDI SDSL RDEEGRTEKNN                          |
| SELMODRAFT_446486 (Selaginella) | 384   | QPTSALLRG-----GDDDI SDSL RDEEGRTEKNN                          |
| Pp1s24_276V6 (Physcomitrella)   | 371   | HGGSRASRSPSSRSKVQSKAGSRVGSRVESKAASRVGSKAGSDALKDWDH NEDNLLEYAL |
| Pp1s189_114V6 (Physcomitrella)  | 372   | QGGSRASRSPNRSKVQSKAG-----SRVESKAGSDSLKEWDRNENNLLLEYAL         |
| At1G76660 (Arabidopsis)         | 331   | YS-----PSDGQKLLRREANLLSQTS                                    |
| Bradi1g66850 (Brachypodium)     | 404   | FGNSAPAAEVSPFNDLPNEAQ-----KVDKSLNNAKAITSPKK-SADQLSSGT         |
| Os01g0103800 (rice)             | 389   | FGNNAPATEVDKS-----LFNVKVI TGPKKSTEQKLSNGS                     |
| Os03g0270700 (rice)             | 420   | FGNNAPATEVDKP-----LFNVKVT TSPKK-SADQLSNDS                     |
| GRMZM2G060467 (maize)           | 397   | FGNNTPATEICPFSDLP---N-----EVDKSCAYAKDDTSPKK-SANQLSTDS         |
| Sobic.009G229800 (sorghum DW1)  | 396   | FGNNAPATEICPFSDLPNEVQ-----KVDKSCAYAKDGTSPKK-SANQLSIDS         |
| GRMZM2G079832 (maize)           | 398   | FGNNAPATEICPFSDLPSEVQ-----KADKSCTYVKDGTSPKK-SANQLSIDS         |
| Bradi4g38850 (Brachypodium)     | 264   | -----                                                         |
| Sobic.002G138500 (sorghum)      | 280   | -----                                                         |
| GRMZM2G318292 (maize)           | ----- | -----                                                         |
| At1G63720 (Arabidopsis)         | 302   | -----                                                         |
| At4g25620 (Arabidopsis)         | 365   | -HEKASG-----EHLRP                                             |
| At5g52430 (Arabidopsis)         | 368   | ETEESST-----TDIRR                                             |
| Bradi3g55830 (Brachypodium)     | 337   | LPTSNGDHSR-----ESNE                                           |
| Os02g0822000 (rice)             | 337   | VPTGNG---DHHP-----RESND                                       |
| Sobic.004G349900 (sorghum)      | 340   | APTSNG---DHHR-----ESNE                                        |
| GRMZM2G143854 (maize)           | 341   | APTGS---DHHR-----ESNE                                         |

Intron II

|                                 |       |                                                                 |
|---------------------------------|-------|-----------------------------------------------------------------|
| SELMODRAFT_447750 (Selaginella) | 413   | DLAA--TATAETTTTHSRPIEDGVGVCSSSSSSSSCLDKSGDVEGEPKRYEEQALESPRS    |
| SELMODRAFT_446486 (Selaginella) | 413   | DLG---ATAETTTTHSRPIEDGVGVCSSSSSSSSCLDKSGDVEGEAKRFEEQALESPRS     |
| Pp1s24_276V6 (Physcomitrella)   | 431   | SLLEGTGDKRPGTIGWAPVDTSLPRESEGP IQSSSTTRNETEENEKDTVYKSIKNGKGS    |
| Pp1s189_114V6 (Physcomitrella)  | 420   | SLLEGS DGKRP GTIGWAPVDTSLPREPEASTQSSDLSNGTEENETDRVYKGDQNGKSSS   |
| At1G76660 (Arabidopsis)         | 352   | PKSEADLD SQVDFQSPKSSNSYKDHKQRNRIHAD E EAL LSRVGSVKGSRSYHISSDAE  |
| Bradi1g66850 (Brachypodium)     | 451   | PQKVLHLDIFKGTIKGGHLSDDDGAKDCHPFRKSRDEISL KPIEV RKKSPPGQA-CSDAE  |
| Os01g0103800 (rice)             | 424   | PQNVVHLDIFKGTIKGGDVCDEGVVKDCHPFRKGRDEISL KPIEV RKKVGGGQS-CSDAE  |
| Os03g0270700 (rice)             | 454   | PHNVVHLDIFKGTIKGGDLSDEGVVKDCHPFRKAMDEISL KPIEV RKKVQPGQSSSSDAE  |
| GRMZM2G060467 (maize)           | 441   | PNKVLRLDVFVGTIKGGHQSDEGRKDKGHLFRKTAD EISL KPIEV RKKSLPGHS-CSDAE |
| Sobic.009G229800 (sorghum DW1)  | 443   | PNKVLRLDVFVGTIKGGHQSDEGVVKDGHFPRRTTDEISL KPIEV RKKSLPGHS-CSDAE  |
| GRMZM2G079832 (maize)           | 445   | PNKVLRLDVFVGTIKGGHLSDEGVARDGHFPRRTTDEISL KPIEV RKKSPPGHS-CSDAE  |
| Bradi4g38850 (Brachypodium)     | 264   | -----GSDQEEEGRGGSGGD DDEV PKSGEFVFGNAD DGAEDVD-----             |
| Sobic.002G138500 (sorghum)      | 280   | -----SKDDEVA TGGGEFVFGSNADAAAGERFAGGEVVGARGDAT-----             |
| GRMZM2G318292 (maize)           | ----- | -----                                                           |
| At1G63720 (Arabidopsis)         | 302   | -----EASSDQESMNHSSLGSNKEFNFGTDEKHLTVDEHRSASPK--NSNDWS-----      |
| At4g25620 (Arabidopsis)         | 376   | NCCKTSGETESEQS--QKLSRFSTGSNKEFKFDSTNEEMIEKI--RSEWWANEKVAGKGD    |
| At5g52430 (Arabidopsis)         | 380   | NIEKRSGDRENEQHRIQKLSSSSIGSSKEFKFDNTK DENIEKV--AGNSWS-----       |
| Bradi3g55830 (Brachypodium)     | 351   | TRAGLYVDETYHDLPEKARRSLSLRLAKEFKFNNDG AHV EETGALGSDWWANDKVAAIT   |
| Os02g0822000 (rice)             | 353   | TRAGLCVDETYHDLPEKARRSLSLRKAKEFKFNNDVAPSV EPS--VGSDDWWANEKVAGIT  |
| Sobic.004G349900 (sorghum)      | 354   | ARAGLYVDETYHDLPEKARRSLSLRLAKDFNFNNDVANV EPS--VGSDDWWANEKVAGMT   |
| GRMZM2G143854 (maize)           | 355   | ARAGLYVDES YHDLPEKARRSLSLRLAKEFNFNNDVGSV EPS--VGSDDWWANEKVAGMT  |

|                                 |     |                                                               |
|---------------------------------|-----|---------------------------------------------------------------|
| SELMODRAFT_447750 (Selaginella) | 471 | CGIVLEVEITPDDLVKTSWSSQAK-----                                 |
| SELMODRAFT_446486 (Selaginella) | 469 | CGIVLEVEITPDDLKVNITGAKNK-----KKNIGIVTKKNGFHNNHHNNHRNGFV       |
| Pp1s24_276V6 (Physcomitrella)   | 491 | NVPQQVVGAGAKEVSEGTITPVGHHSAPDCCSRCELSVQCEQLSVALKEARRKQOQEKD   |
| Pp1s189_114V6 (Physcomitrella)  | 480 | EGFQEAISAGAIIEEPEETVVSANH-----DCSSRYESLVSQYEQLSVALKEAERKQLEKD |
| At1G76660 (Arabidopsis)         | 412 | VEYRRGRSLRESRENHRKA-----                                      |
| Bradi1g66850 (Brachypodium)     | 510 | IEYRRARSLREANSVLSWRSTLARQLQ                                   |
| Os01g0103800 (rice)             | 483 | IEYRRARSLREANGVVSWRSTLARQLQ                                   |
| Os03g0270700 (rice)             | 514 | IEYRRARSLREANGVLSWRSTLARQLQ                                   |
| GRMZM2G060467 (maize)           | 500 | IEYRRTRSLRDANGVLSRRSALARQLH                                   |
| Sobic.009G229800 (sorghum DW1)  | 502 | IEYRRTRSLRDANGVLSRRSALARQLH                                   |
| GRMZM2G079832 (maize)           | 504 | IEYRRTRSLRDANGVLSRRSALARQLH                                   |
| Bradi4g38850 (Brachypodium)     | 304 | -----GNRWPAFPPRG-----                                         |
| Sobic.002G138500 (sorghum)      | 319 | -----EQWPFLLAHTHS-----                                        |
| GRMZM2G318292 (maize)           |     | -----                                                         |
| At1G63720 (Arabidopsis)         | 348 | -----FFPVMQSGTLS-----                                         |
| At4g25620 (Arabidopsis)         | 432 | HSPRNSWIFFPVLRSGHT-----                                       |
| At5g52430 (Arabidopsis)         | 429 | -----FFPGLRSGVS-----                                          |
| Bradi3g55830 (Brachypodium)     | 411 | TEPRKSWIFRPMAQPGVS-----                                       |
| Os02g0822000 (rice)             | 411 | SEPRKSWIFFPVAQPGVS-----                                       |
| Sobic.004G349900 (sorghum)      | 412 | SEPKNWIFHPVAQPGVS-----                                        |
| GRMZM2G143854 (maize)           | 413 | TEPKKNWIFHPVVQPGVS-----                                       |

|                                 |     |                                               |
|---------------------------------|-----|-----------------------------------------------|
| SELMODRAFT_447750 (Selaginella) |     | -----                                         |
| SELMODRAFT_446486 (Selaginella) | 521 | ASSKSSWEDLDAMSVDCMELNLTNTIKSPLKSSPIMDSC-----  |
| Pp1s24_276V6 (Physcomitrella)   | 551 | RLAEEREKQIRHLTQLLQSGGLQKFVGFPAANQVGEENNVKDIS  |
| Pp1s189_114V6 (Physcomitrella)  | 536 | RLAEEREQQKRHLTHLLQSGGLQKLVGDYLRAGNEVGNKKTADAP |
| At1G76660 (Arabidopsis)         |     | -----                                         |
| Bradi1g66850 (Brachypodium)     |     | -----                                         |
| Os01g0103800 (rice)             |     | -----                                         |
| Os03g0270700 (rice)             |     | -----                                         |
| GRMZM2G060467 (maize)           |     | -----                                         |
| Sobic.009G229800 (sorghum DW1)  |     | -----                                         |
| GRMZM2G079832 (maize)           |     | -----                                         |
| Bradi4g38850 (Brachypodium)     |     | -----                                         |
| Sobic.002G138500 (sorghum)      |     | -----                                         |
| GRMZM2G318292 (maize)           |     | -----                                         |
| At1G63720 (Arabidopsis)         |     | -----                                         |
| At4g25620 (Arabidopsis)         |     | -----                                         |
| At5g52430 (Arabidopsis)         |     | -----                                         |
| Bradi3g55830 (Brachypodium)     |     | -----                                         |
| Os02g0822000 (rice)             |     | -----                                         |
| Sobic.004G349900 (sorghum)      |     | -----                                         |
| GRMZM2G143854 (maize)           |     | -----                                         |

**Supplementary Figure S6 | Amino acid alignment of sorghum DW1 and its homologs.** The proteins are same as in Supplementary Fig. S3. The positions of Intron 1 and 2 are indicated by arrowheads. The mutation in bmr-6 is indicated by an arrow. The six conserved domains are indicated by red rectangles.

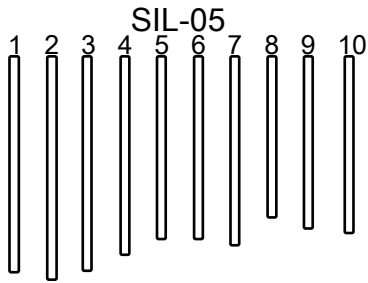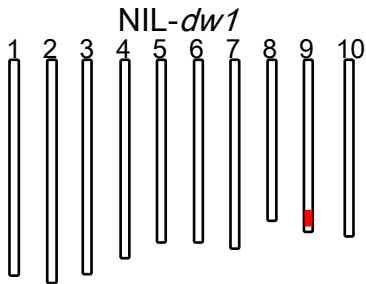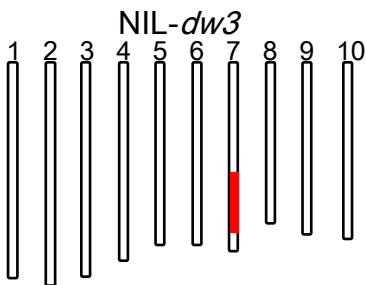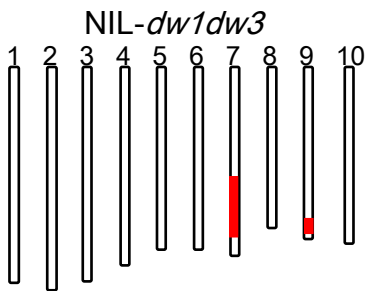

**Supplementary Figure S7 | Graphical representations of each NIL.** White and red bars indicate chromosomes of SIL-05 and *bmr-6*, respectively. NIL-*dw1* and NIL-*dw3* contain a ~170 kb and ~2.8 Mb fragments of *bmr-6*, respectively.

Supplemental Table S1 Primers used in this study

| name        | sequence                      | purpose |
|-------------|-------------------------------|---------|
| ssr5-34_R   | GTTTGACAGACACCGGGAGTAGATGATGT | QTL     |
| Xcup01_F    | ACATGGGCGGGTTGAAGAC           | QTL     |
| Xcup01_R    | GTTTGCAGGAAGGGAGGATGTAG       | QTL     |
| Xtxp79_F    | ACTCCACAGCCAGAACATT           | QTL     |
| Xtxp79_R    | GTTTGAAGCAGTGCAGGATTACGT      | QTL     |
| SB260_F     | TCAAGTCCACTCTACTCTGCCT        | QTL     |
| SB260_R     | AAGAAAAGGCTAATCGATTGGGGA      | QTL     |
| SB441_F     | ACAGAGACTCCGCTGGAAATGAAC      | QTL     |
| SB441_R     | TGTTTTTTGGATCGGAGTGAGAA       | QTL     |
| SB474_F     | TAGGTTGCAATTGATGTTCCAACG      | QTL     |
| SB474_R     | CACCTACAACGCGGATACAACCA       | QTL     |
| SSR2_491_F  | AGACGAAGAAGAGCTTAGCGTGGAG     | QTL     |
| SSR2_491_R  | GTTTGTAGATGAACCTGGTGTCTCCC    | QTL     |
| Xtxp88_F    | ACGTGAATCAGCGAGTGTGG          | QTL     |
| Xtxp88_R    | GTTTGCCTAATGTTCTCTGCTC        | QTL     |
| Xtxp11_F    | ATCGAGAAATCAACATGCTG          | QTL     |
| Xtxp11_R    | GTTTGTAGACCGACGAGATAAG        | QTL     |
| Xtxp37_F    | ACAACCTAAGAGGCCTATTTAAC       | QTL     |
| Xtxp37_R    | GTTTACGGCGACTATGTAACCTATG     | QTL     |
| Xtxp335_F   | ATATTTCTCTTGAAGAATCAGG        | QTL     |
| Xtxp335_R   | GTTTATTCATCGAGCAAAGCA         | QTL     |
| SSR2_630_F  | ATAATGGACAAGCAGAAACGACGA      | QTL     |
| SSR2_630_R  | GTTTATGAGCAGCGGATAAGTTCGAGAG  | QTL     |
| Xtxp279_F   | ATTCTGACTTAACCCACCCCTAAA      | QTL     |
| Xtxp279_R   | GTTTAGCTCATCAATGCCCAAAC       | QTL     |
| SSR2_733_F  | ATATTGTGTTGGGGAAACATAGGG      | QTL     |
| SSR2_733_R  | GTTTGGCTCAGGAGGCTTATTGTGTT    | QTL     |
| SSR3_868_F  | ACTCATCAGGCTAAATGATCACC       | QTL     |
| SSR3_868_R  | GTTTATCGAGCACCTGAAACATGAAACA  | QTL     |
| SSR3_891_F  | AGTCCTCTCTCTCTCTCTCTCT        | QTL     |
| SSR3_891_R  | GTTTGAACACAAAGGATGCGGTGACATA  | QTL     |
| SSR5_968_F  | ACCTGGAAATCAGGAGACGAATCTT     | QTL     |
| SSR5_968_R  | GTTTAATTAACGCACACCCCTTAGGAGC  | QTL     |
| SSR3_987_F  | ATACTCCATGTGGCAGATCTCAAGC     | QTL     |
| SSR3_987_R  | GTTTAATGGAGTGGAGAGTGGAGAGTGG  | QTL     |
| SSR5_1004_F | ATGATCCATCATCTTTCCATCCGT      | QTL     |
| SSR5_1004_R | GTTTCAAGGGACATATTGTGAGCAGGTG  | QTL     |
| Xtxp297_F   | AGACCCATATGTGTTTGTGCGAAAG     | QTL     |
| Xtxp297_R   | GTTTGCACAATCTCGCCTAAATCAACAAT | QTL     |
| Xtxp211_F   | ATCAACGGCCAATGATTTCTAAC       | QTL     |
| Xtxp211_R   | GTTTAGGTTGCGAATAAAAGTAATGTG   | QTL     |
| SB1088_F    | GGAAAGGGAGAAATGGTGAAGAAC      | QTL     |
| SB1088_R    | CACCAACAACATCAGGCCTATTA       | QTL     |
| SSR2_1142_F | ATCTACTTGTCCCTCTGCCTCTGCT     | QTL     |
| SSR2_1142_R | GTTTGGTTGCGAGCTTTGAATGATACAC  | QTL     |
| Xtxp72_F    | ATTATGGAAGCAAATGAC            | QTL     |
| Xtxp72_R    | GTTTCCGAATCCTAATTGAGGTAAGC    | QTL     |
| SSR2_1196_F | ACATTGCTAGGTACATGGCCAAAT      | QTL     |
| SSR2_1196_R | GTTTCCCGTTGGTTCCCGTGTATAAAT   | QTL     |
| SSR3_1264_F | ACTCAGTTCACGACGATTGACTGC      | QTL     |
| SSR3_1264_R | GTTTACCACGCATCTTTTCGTAGGTCAT  | QTL     |
| Xtxp1_F     | ATTGGCTTTTGTGGAGCTG           | QTL     |
| Xtxp1_R     | GTTTACCCAGCAGCACTACACTAC      | QTL     |
| Xtxp56_F    | ATGCTCTCGTAGTTGCGGTGTTG       | QTL     |
| Xtxp56_R    | GTTTCCGAAGGAGTGCCTTTGGAC      | QTL     |
| SB1308_F    | TTGTATTGCGTGAGACAAGGGGTC      | QTL     |
| SB1308_R    | CTTCATCAAGTTAGTGTGGCGACG      | QTL     |
| SB1311_F    | GCCGGAGTAGTGGACTCTGTCTGT      | QTL     |
| SB1311_R    | AAACCAAAGCAAAGCAAAGGTCG       | QTL     |
| SB1343_F    | CTAAGGCGTGCCTGTAAGTAAAC       | QTL     |
| SB1343_R    | TGTGACATGTAACGGACTGCTCAA      | QTL     |
| SB1362_F    | AGCGCAATTTGGATGCTGATATGTA     | QTL     |
| SB1362_R    | TAGAACAACAGCCCTCTTTGCTG       | QTL     |
| SB1378_F    | AGCTCGGAATTCATTCAAATCAGG      | QTL     |
| SB1378_R    | ATCTTGCAGCAATCGAAGTCAT        | QTL     |
| SB1392_F    | TGCTTGTGCTGCAATAAAAGAGTG      | QTL     |
| SB1392_R    | ATAGCCTCTGTGCGTGTCTTTGTG      | QTL     |
| SB1426_F    | TGCAATGTGTGTTTTCCAGGAGA       | QTL     |
| SB1426_R    | TACAATGGACACTCGTCAACAGC       | QTL     |
| Xtxp7_F     | ACATCTACTACCTCTCACC           | QTL     |
| Xtxp7_R     | GTTTACACATCGAGACCAAGTTG       | QTL     |
| SB1491_F    | GAACTGATCGGTTAACATGTACGGC     | QTL     |
| SB1491_R    | GGAAATGGCTTTGGAGAGAGGTT       | QTL     |
| SSR4_1518_F | AGATAGGAGGTGCCAGCCAGTATG      | QTL     |
| SSR4_1518_R | GTTTCTCTCTCATCCGCTCTCATTCTCC  | QTL     |
| SSR2_1526_F | ATGTGTTCTCTGTCTTACTTGGCCT     | QTL     |
| SSR2_1526_R | GTTTAGCAAAACGGTCTCCTACGTACC   | QTL     |
| SSR3_1562_F | AGAGACGACGCTAATCCATCCAAC      | QTL     |
| SSR3_1562_R | GTTTGAAGAACACCAAGTGCATACATCC  | QTL     |
| SSR5_1722_F | AGGCCGGCCGATTATTTTCTC         | QTL     |
| SSR5_1722_R | GTTTAAAGAATATTATCTCGTGGGTGCG  | QTL     |
| SSR2_1779_F | ACAAGCACCAACCATCAAGAAG        | QTL     |
| SSR2_1779_R | GTTTCTCTGCTCTCGTCTCGTCTCT     | QTL     |
| Xtxp9_F     | ACAATAGCACCCGCGCGG            | QTL     |
| Xtxp9_R     | GTTTCAATTTGGAGTCCCTGATAC      | QTL     |
| SSR2_1814_F | ATTTAATCCAATCCAGGAGAAATGC     | QTL     |
| SSR2_1814_R | GTTTCCGAAATGATTGCCAGTTTCAGTA  | QTL     |
| SSR2_1839_F | ATGAAGAAGCTGTCCGTTTGACAAG     | QTL     |
| SSR2_1839_R | GTTTAAAAAGCTGCTCCTTTGAGGCTTT  | QTL     |
| SB1862_F    | GTGCATAGGGCCAAAAGAGCACTA      | QTL     |
| SB1862_R    | TGACCAGCATATGGGTACATCTT       | QTL     |
| SB1936_F    | CCTCTCTCTCTCTCTCCCAACAGC      | QTL     |
| SB1936_R    | CATGAATTTCTCGCATCAATCCAC      | QTL     |
| Xtxp31_F    | ATGCGAGGCTGCCTACTAG           | QTL     |
| Xtxp31_R    | GTTTGGACGTACCTATTGGTGC        | QTL     |
| SSR2_1992_F | ACGCATCAGGAATTCACATTTAGGCT    | QTL     |
| SSR2_1992_R | GTTTGTGCAAAGTACGATGGATCAGGT   | QTL     |
| SSR2_2078_F | ACTTAATCAATCACACCTCGCTCCC     | QTL     |
| SSR2_2078_R | GTTTCTTTTCCACACCAACCATGAGA    | QTL     |
| SSR3_2122_F | AGAAGAGCCAAAGGAAGGGAAGATA     | QTL     |
| SSR3_2122_R | GTTTAAAAGTGACAGACACCCGTAGCC   | QTL     |
| SSR4_2129_F | ACGGGAAAATCTTGATCATGGTG       | QTL     |
| SSR4_2129_R | GTTTGGAGAGGCTCATATTTGGA       | QTL     |
| Xtxp285_F   | ATTTGATTCTTCTGCTTTGCCCTTGT    | QTL     |



|              |                               |     |
|--------------|-------------------------------|-----|
| Xtxp285_R    | GTTTGTCAATTTCCCCCTTCTTTCTTT   | QTL |
| Xtxp70_F     | AGTGACCTTAGCACCAAGCTC         | QTL |
| Xtxp70_R     | GTTTCAGGTAGCACTAGAG           | QTL |
| SSR3_2362_F  | ATGCAATCTATAGCAGCTGGAGACG     | QTL |
| SSR3_2362_R  | GTTTGTATGCATTTGCAAGCAGTGTGT   | QTL |
| SSR2_2435_F  | ATAGCTAGCTGCGTAATGACGAGGA     | QTL |
| SSR2_2435_R  | GTTTCCGAGCATCGTCGGAATAATACA   | QTL |
| Xtxp26_F     | ACAAGTGTAGTAGCAGTTTGTCTCT     | QTL |
| Xtxp26_R     | GTTTAGGTATCAAAGGACCAAGG       | QTL |
| SSR5_2513_F  | AGATGAGCCATATTTGGCAAGGAA      | QTL |
| SSR5_2513_R  | GTTTCAGTAAAGCTGGCTAGCTGCAACA  | QTL |
| SSR2_2565_F  | ACTGCACGCCTAATTATCCCTTGTG     | QTL |
| SSR2_2565_R  | GTTTGTCTGCTGCTGCCAGCTACTATCA  | QTL |
| SSR3_2599_F  | ATCTGGAGTCTGGAAGAATGCTGG      | QTL |
| SSR3_2599_R  | GTTTCCACTAGTGATCAGCAC         | QTL |
| Xtxp343_F    | ACGATTGGACATAAGTGTTC          | QTL |
| Xtxp343_R    | GTTTATAAACATCAGCAGAGGTG       | QTL |
| SSR5_2635_F  | AGTGTCCGGCCTTCTTGTGTTAG       | QTL |
| SSR5_2635_R  | GTTTGAGCAGTGTCTTTGGAATTAGGA   | QTL |
| SSR5_2660_F  | ACAGCCCCCTTTCATATGTTCAAAA     | QTL |
| SSR5_2660_R  | GTTTATGGAGCAGGCTACTAGTGTCCGGG | QTL |
| SSR5_2772_F  | AGATGCAACCAACCAACATAGCTG      | QTL |
| SSR5_2772_R  | GTTTAAAGCCAAAGGAAAGACCCAAAAG  | QTL |
| SSR2_2831_F  | ATTCAGCTTTGGATCTCGATCTGTG     | QTL |
| SSR2_2831_R  | GTTTCGTCAAATCTAGCTCTATCATCA   | QTL |
| SSR3_2963_F  | AGAGGGAGAGTGTGGATGCTGGTAT     | QTL |
| SSR3_2963_R  | GTTTGAAATCTGAGCCTAGGAGGGTGGT  | QTL |
| SSR2_3016_F  | AGGAAAAATGAGAAAAGAAACGGGG     | QTL |
| SSR2_3016_R  | GTTTGTCTCTGATTGTCAATGCCTCCCT  | QTL |
| SSR2_3045_F  | ATTGGCCATTTGACCTGTCTAAAAG     | QTL |
| SSR2_3045_R  | GTTTAAACATACCAAGCCGCGTATC     | QTL |
| SSR4_3052_F  | ATGGTAGTTTCTTCTCCCAACCC       | QTL |
| SSR4_3052_R  | GTTTAATTAAGAAACAAAACCCGGAGGG  | QTL |
| SSR4_3056_F  | AGACGCCATCTACTCCATCCTCTA      | QTL |
| SSR4_3056_R  | GTTTATCTACGCTCTGGATCGTCAACCTC | QTL |
| SB3067_F     | ATGAGCAGCAGAAGCAATCATCAA      | QTL |
| SB3067_R     | TGTTTCAGTTATGTGTGTGGTGGGA     | QTL |
| SB3077_F     | TGTTTCCTTTGTGTACGGTGTTCG      | QTL |
| SB3077_R     | GCCATCTGATGCTACGCTGTAGTG      | QTL |
| SB3134_F     | GGATGCAGGAAGAGCTAAAGCAA       | QTL |
| SB3134_R     | CTGCAATGCACAGTTTCAGAGTGA      | QTL |
| SB3146_F     | CCCTCCTGTCTCTTATTAGGTTTTCA    | QTL |
| SB3146_R     | ACCACCCACCAAAATGAATGTTTC      | QTL |
| SB3160_F     | GGAACTCTGGAACTTGATTGGCTCA     | QTL |
| SB3160_R     | GTACAAGTTGGAACACAAGGCACG      | QTL |
| SSR3_3178_F  | ATTCTCTGCTCCGTTTCTAACAGG      | QTL |
| SSR3_3178_R  | GTTTCTCGATTCTATCTATCGTCTGG    | QTL |
| SSR2_3183_F  | ACCTTTGCACTTGATCACTTTCCCT     | QTL |
| SSR2_3183_R  | GTTTCTTCTCCGCAACTTCTCATC      | QTL |
| SSR3_3251_F  | AGGACACCCACACCGGATCTATAAGG    | QTL |
| SSR3_3251_R  | GTTTCCACCCACCACTACATGAAGGAAT  | QTL |
| SSR5_3411_F  | AGCTCGCATACTAGCTCATCGTTCA     | QTL |
| SSR5_3411_R  | GTTTGACTGTCCATGCGATCAGTAGGAA  | QTL |
| YUC7_F2-R1_F | CTAGCTCATCGTTCACCACC          | QTL |
| YUC7_F2-R1_R | GGGAGAAGAGACTGTCCATG          | QTL |
| SSR2_3417_F  | ACACTCTCTCCCACTTCTCATCAA      | QTL |
| SSR2_3417_R  | GTTTGTGGATTACCACAAGGCTATGA    | QTL |
| SSR5_3423_F  | AGTCCTATAAGACCTCGCCTCCG       | QTL |
| SSR5_3423_R  | GTTTACGTTCTAGGAGTTGTCCCGGAG   | QTL |
| Xtxp6_F      | ATCGGATCCGTGATC               | QTL |
| Xtxp6_R      | GTTTCTAGGGAGGTTGCCAC          | QTL |
| SSR3_3479_F  | ACTGGCGTGGCAAGTTCAGTCT        | QTL |
| SSR3_3479_R  | GTTTGTGCTGTGTTTTGGAGAGTTGA    | QTL |
| SB24905_F    | GGCACCGTATGCTGCATGCTTAT       | QTL |
| SB24905_R    | TGGATCCAATTAATCTCTCTGTCA      | QTL |
| SSR2_3489_F  | ACAATAAATGCCGGTTTTCTGTGGAG    | QTL |
| SSR2_3489_R  | GTTTGCATGCCACTTCTCTCATGT      | QTL |
| SB3484_F     | GCGACAGCGATCGGTGATATAATA      | QTL |
| SB3484_R     | TATGCTTTTCATGGAAATGTGTGG      | QTL |
| SB24977_F    | ACAGACAGACATGCACGAAGAAGG      | QTL |
| SB24977_R    | CATGGAAATCCGCGAGATACTTTTT     | QTL |
| SB24991_F    | GTCGCCACATCCTAAATCATCATAG     | QTL |
| SB24991_R    | GTTGGCCTGGTATGGCAAACTTTA      | QTL |
| SSR4_3503_F  | AGTCCCTGTCTGACTCCGATCC        | QTL |
| SSR4_3503_R  | GTTTAACTACACCACCCTCGACAT      | QTL |
| SB25027_F    | TCCGATGCTAAAAATGAGTTGTGC      | QTL |
| SB25027_R    | TAGACTAGAGGTCTGGCGGGAGAG      | QTL |
| SB25034_F    | GCCTCACAAACAACAAAATCAGG       | QTL |
| SB25034_R    | CCCATGTTGGGTTTCAACTCTAGC      | QTL |
| SB3507_F     | ACTCTTCTCTCTCCAGTCCCACG       | QTL |
| SB3507_R     | GCGCCTCTACAGGCTACAGGTATT      | QTL |
| SB25093_F    | GAGAGGGTGCAGGGAATAGGAATG      | QTL |
| SB25093_R    | TAGATCCATACCCCTTCAGGACCC      | QTL |
| SB3517_F     | CGAATCAGTTTTGTGCATCTTCGT      | QTL |
| SB3517_R     | AGTGCCGGAATCCTAGAAAGAAGG      | QTL |
| SB25162_F    | CGCGTAAGTCACCAACAAACACT       | QTL |
| SB25162_R    | AACCTGTCTTCAGCACCCAGATTTC     | QTL |
| SSR5_3535_F  | ATGAATGCGTGGAAGATGAAGGT       | QTL |
| SSR5_3535_R  | GTTTGCATTACGTAACGCTATCG       | QTL |
| SB3547_F     | AGACATCTCCCTCTCCATGATGCT      | QTL |
| SB3547_R     | GCCGCATCAGCAAAAATACCATAAA     | QTL |
| SB3552_F     | TCCACCTGGCTCTCACTTTCTAGG      | QTL |
| SB3552_R     | ATCATGCATGTCGTTTCTGATCGT      | QTL |
| SB3564_F     | TGAAAACAGGAGGAAGAGGAATCG      | QTL |
| SB3564_R     | CCAGAGAAACCATCTATGTGCGGTG     | QTL |
| SSR2_3577_F  | AGAAAAGGAGGTTCTCTGCTGCTT      | QTL |
| SSR2_3577_R  | GTTTACATCCACCCTTCTTTGGTCAAA   | QTL |
| Xtxp145_F    | AGTTCTCTGCCATTACT             | QTL |
| Xtxp145_R    | GTTTCTTCCGCACATCCAC           | QTL |
| Xtxp274_F    | AGAAAATTACAAATGTACCCCTAAAAGT  | QTL |
| Xtxp274_R    | GTTTACTCTACTCCTTCCGTCACAT     | QTL |
| SSR5_3737_F  | ACTGACAGAAACATGCATGGGGTTA     | QTL |
| SSR5_3737_R  | GTTTAAACGACGCACTTGGTCAGAAA    | QTL |
| SSR4_3805_F  | ACAAGTTGGAGTTTCTCAGCATCG      | QTL |
| SSR4_3805_R  | GTTTACCAAGGTATGCAGGGACCAC     | QTL |
| SSR2_3870_F  | ATAATAATGCTGCATGCTGAGTGCC     | QTL |
| SSR2_3870_R  | GTTTCCATTGTTTCTGATAGCTTGACAG  | QTL |

|             |                                 |     |
|-------------|---------------------------------|-----|
| Xtxp159_F   | ACCCAAAGCCCAATCAG               | QTL |
| Xtxp159_R   | GTTTGGGGGAGAAACGGTGAG           | QTL |
| SSR5_3966_F | ATCAGTTCATCTCCTTTGGGTGC         | QTL |
| SSR5_3966_R | GTTTACTTCCACAGGGTCCACAGCACAGTC  | QTL |
| SSR5_4016_F | AGACAAGAGAAATCCCGTAAACCC        | QTL |
| SSR5_4016_R | GTTTGTACCTCAACCAGACGCTCGTCAC    | QTL |
| SSR2_4043_F | AGCAAATTTGGGGTGTACATCGT         | QTL |
| SSR2_4043_R | GTTTGTGGTGGTTGTTGCTGTTGTTG      | QTL |
| SSR5_4072_F | ACTACCTGCGGGTGAAGAGTGTGAT       | QTL |
| SSR5_4072_R | GTTTGTAGTACGAACGTCTCGGCTTGTG    | QTL |
| SSR3_4143_F | ATCTCCTTAATTACGACCGACCGA        | QTL |
| SSR3_4143_R | GTTTCTCCATGGATCGACCCCTTTGT      | QTL |
| SSR3_4197_F | ACGATCGAGTTTTCTTGTGGTGTTC       | QTL |
| SSR3_4197_R | GTTTATGTCATCCATGTTGCTCTCTCT     | QTL |
| SSR4_4230_F | ATTTCATCAACCCTTTGTCAACCCTT      | QTL |
| SSR4_4230_R | GTTTGTGTAGAAATCACCGCTAACTGGG    | QTL |
| Xtxp273_F   | AGTACCATTAAATTGTTTGCAGTAG       | QTL |
| Xtxp273_R   | GTTTCAGAGGAGGAGGAAGAGAAGG       | QTL |
| SSR4_4339_F | ACAAAAGGGGAAAGAAACCAAGCTC       | QTL |
| SSR4_4339_R | GTTTCCACCACAAAGGGGAAAGGAAATA    | QTL |
| SSR4_4358_F | AGCCTCCTCAGTCAAAAACCTCACA       | QTL |
| SSR4_4358_R | GTTTGTGCTTCCCGTCTAGAATTAGC      | QTL |
| SSR4_4433_F | AGCTTGTGGAGGGAAGTACCC           | QTL |
| SSR4_4433_R | GTTTAGGCCACCAAGTAAGCAGTGTACC    | QTL |
| SSR3_4470_F | ATGCAGACATCTGAATTACGGTGGT       | QTL |
| SSR3_4470_R | GTTTCAGGGAAGACTGAACTACGGGAG     | QTL |
| SSR2_4480_F | ACCATAGCTGCGAGCAACCTGAG         | QTL |
| SSR2_4480_R | GTTTGTACGCTTTAGATGAGGCCAGAA     | QTL |
| SSR5_4493_F | AGATGCAGACGACATGGCTAGAGAA       | QTL |
| SSR5_4493_R | GTTTAAATTCGGTACCTCAATCGCC       | QTL |
| Xtxp354_F   | ATGGGCAGGGTATCTAACTGA           | QTL |
| Xtxp354_R   | GTTTGCCTTTTCTGAGCCTTGA          | QTL |
| SSR2_4533_F | ACAAGGAGAGAGAGGGGGCAAAAG        | QTL |
| SSR2_4533_R | GTTTACCGATCGTCTCTGCTGTCTA       | QTL |
| SSR3_4586_F | ATCCTACGTAGCTACTCCAGCAGGC       | QTL |
| SSR3_4586_R | GTTTCTGCAGGGTACGTAACTCCTACGC    | QTL |
| SSR5_4642_F | ACAGAGAGGTGGAGGAGGCAGTTAG       | QTL |
| SSR5_4642_R | GTTTATCATGTCCACCCACCTCTTTT      | QTL |
| SSR4_4687_F | ATCATTTCATTACCCACCAAG           | QTL |
| SSR4_4687_R | GTTTATGCAGCAAGTACACAACCTGGAC    | QTL |
| SSR3_4688_F | ACTGTAAGCATGATGAAGGTGCTGG       | QTL |
| SSR3_4688_R | GTTTAAAGAGGTGATGACAGGGATGGAG    | QTL |
| SSR3_4706_F | ATTGCTTGCTCCTCCTGGGACT          | QTL |
| SSR3_4706_R | GTTTGTGGCTTTGCCTAGCTTCTCTT      | QTL |
| SSR3_4711_F | AGGACCTGCACCTTCGATGGTGT         | QTL |
| SSR3_4711_R | GTTTGGGACGACGCTAACTGTCTCCTTA    | QTL |
| SSR3_4715_F | ACAATTTCGAGAAGAGCTGGTAGTGG      | QTL |
| SSR3_4715_R | GTTTGTGCGCGTGTGATGTGCAT         | QTL |
| SSR3_4764_F | ATAATTAGTTAGGCCACACGCACA        | QTL |
| SSR3_4764_R | GTTTGTAGGCTGACCGTCTTCTCTCTGT    | QTL |
| Xtxp258_F   | ACACCAAGTGTGCGCAACTGAA          | QTL |
| Xtxp258_R   | GTTTGTCTTAGTGTGAGCCTGACCCAG     | QTL |
| SSR2_4795_F | AGACGACTGCACCTGTTGCTTGACT       | QTL |
| SSR2_4795_R | GTTTCTTGACACCACCAAGAAACCACAG    | QTL |
| Xtxp67_F    | ACCTGACGCTCGTGGCTACC            | QTL |
| Xtxp67_R    | GTTTCCACACAAGATTCCAGGCTCC       | QTL |
| SSR5_4851_F | ACAATCTTAAGGGGTCTACCGGGCA       | QTL |
| SSR5_4851_R | GTTTATGAGAGGGGCATGTAATGTTGGT    | QTL |
| SSR5_4888_F | ACGTCAAAGCAAGTTTCACTTAGAAC      | QTL |
| SSR5_4888_R | GTTTCTCCACGCTGAATCTAATAACACATCA | QTL |
| SSR3_4902_F | ATACAAAGGGAATGCCTCTCTCC         | QTL |
| SSR3_4902_R | GTTTACACACATCGAGGAAAATGTGGG     | QTL |
| SSR5-5007_F | AGGAACTTGTGGTGTAGCAGA           | QTL |
| SSR5-5007_R | GTTTGTGCTCTTCTGACTGTGAGTGA      | QTL |
| SSR5-5031_F | ACTGCACCTTGCTTAGAACCCACTT       | QTL |
| SSR5-5031_R | GTTTGGTATATATGGGGAAGCGTGCCTA    | QTL |
| SB5019_F    | AAAGAGAAGGGAGAGGGGAAAAAGC       | QTL |
| SB5019_R    | GTGGAGCTTGTCCGAGATCTGTCT        | QTL |
| SB5028_F    | TTGCATCCCTAAAAGCATTCTGTC        | QTL |
| SB5028_R    | GCCATTGATGGCTACGTAAATTCC        | QTL |
| SSR2_5042_F | ACAGTAACCACCACCAGAACGCTT        | QTL |
| SSR2_5042_R | GTTTGTGCTTCTTCCCTTGTGTCTT       | QTL |
| SSR4_5057_F | ACCGGCACATTTACTCACTTCTCT        | QTL |
| SSR4_5057_R | GTTTACGATCCACCGAACCAAGAGTT      | QTL |
| SSR4_5059_F | ACAGTACTGTACGACGTAGGAGACGC      | QTL |
| SSR4_5059_R | GTTTACTCCGGACGACGCTAATACAAG     | QTL |
| SSR5_5061_F | ACAACCTCTCCATATCCGAGGTACG       | QTL |
| SSR5_5061_R | GTTTGGGGGAACTCAATTATTCCTTTTG    | QTL |
| Xtxp107_F   | ACAAAGTGAGCGTGGTC               | QTL |
| Xtxp107_R   | GTTTGGACAGGGATAACATAACATA       | QTL |
| SSR3_5111_F | ACAAACCAACCAGCCACTCTTTAT        | QTL |
| SSR3_5111_R | GTTTGGGTTGTTCCATCAGATTCTTCT     | QTL |
| SSR5_5159_F | ATATGCTTCCAATACAGAGGGACCG       | QTL |
| SSR5_5159_R | GTTTGTACGCCAGGAGATGTGATATGG     | QTL |
| SSR5_5216_F | ACATGTCTTGTGATGTGATGTCT         | QTL |
| SSR5_5216_R | GTTTCCACCATCGGTTTCTAGCTG        | QTL |
| SSR3_5242_F | AGCTACAAACATCTGAGACTGCGCA       | QTL |
| SSR3_5242_R | GTTTACAGAGGACCCCTGTTGTTGTAT     | QTL |
| SSR3_5298_F | ACCTGTAAACGCTGCCGTACAC          | QTL |
| SSR3_5298_R | GTTTGTACCTCTTCATCCTTGTGCTT      | QTL |
| SSR2_5303_F | AGAGAGAGGGGAAAGAAAAAGGGC        | QTL |
| SSR2_5303_R | GTTTGTCCACATCGATTCTGCTCTCT      | QTL |
| SSR5_5423_F | ATCCGCTATAAATTGGAGAGACCC        | QTL |
| SSR5_5423_R | GTTTAGCCGACGTAAGCTCACTAGGAAA    | QTL |
| SSR5_5460_F | AGAGAACGAGACTGAAGGTTGGAA        | QTL |
| SSR5_5460_R | GTTTGTGCCCCCTTAAACTTCTGCTCT     | QTL |
| Xtxp141_F   | ATGATGCGCTAGCTTATCT             | QTL |
| Xtxp141_R   | GTTTCAACAAGCCAACTAAA            | QTL |
| SSR2_5529_F | ACAGCAAATTTTCAGGTGGTTTTGAC      | QTL |
| SSR2_5529_R | GTTTATATATCTCTGCGTGAACGGCT      | QTL |
| SSR2_5543_F | ACAACCCCTTGAACCTCAAGAAAGC       | QTL |
| SSR2_5543_R | GTTTAGTGCCAATCCTCTCTCACTCCAC    | QTL |
| SSR3_5556_F | AGCTTCAAAGATGGCCAAAACAGA        | QTL |
| SSR3_5556_R | GTTTGCAGAGCCACAAGTCAAGGTGTTA    | QTL |
| SSR2_5560_F | ACCACAGATCGATTTTTCAGAGGC        | QTL |
| SSR2_5560_R | GTTTCCAGCCTCTAACTCCCTACCACCT    | QTL |
| SSR4_5576_F | ACACGTGTTCTGCTGTTCTCATG         | QTL |

|                      |                                 |                                        |
|----------------------|---------------------------------|----------------------------------------|
| SSR4_5576_R          | GTTTCTCATCACGGATTACGATACAGC     | QTL                                    |
| Xcup07_F             | ACTAGAGGATTGCTGGAAGCG           | QTL                                    |
| Xcup07_R             | GTTTCTGCTGCTTGTGCTTGAG          | QTL                                    |
| SSR2_5603_F          | ACAATTCTGCTGCACACTTCAGATGC      | QTL                                    |
| SSR2_5603_R          | GTTTCTGCGACCGTCTCACAACAATTAG    | QTL                                    |
| SSR_chr.9_57167_25_F | GTTTCTGCTGCTGGAGAGGTGCTGG       | fine mapping                           |
| SSR_chr.9_57167_25_R | GCCCCGCATCCAAATTCCTAATCCC       | fine mapping                           |
| SSR_chr.9_57184_F    | GGCCTAGATTGTTTCATGATA           | fine mapping                           |
| SSR_chr.9_57184_R    | TAAACACGGCCCTAAGTCGAT           | fine mapping                           |
| SSR_chr.9_57191_F    | CTAGGTTAAAGCCGTCGGCC            | fine mapping                           |
| SSR_chr.9_57191_R    | AACCCTAACGAGTGGAGGAC            | fine mapping                           |
| SNP_57209seq_F       | GGCAGTACGTACAATCAAG             | fine mapping                           |
| SNP_57209seq_R       | ATAATGCGCGTATGCACCTG            | fine mapping                           |
| SNP_57211seq_F       | TCCTGCAGCACGTACTTCTTG           | fine mapping                           |
| SNP_57211seq_R       | GATCTAGAGGTCTTCCATTG            | fine mapping                           |
| SNP_57211_Xbal_F     | TTCGCTGTGGCCATATGC              | fine mapping                           |
| SNP_57211_Xbal_R     | AAGGCATGTTATGCTCTTGTGGCAGTCT    | fine mapping                           |
| SNP_57225_Mbol_F     | AGGCGCCAGAATGACTAGAG            | fine mapping                           |
| SNP_57225_Mbol_R     | GGAGGAGGAAGGCCACGGCGATGACCCGGAT | fine mapping                           |
| SSR_chr.9_57227_F    | GTACTACCTGCTGTTGCTCG            | fine mapping                           |
| SSR_chr.9_57227_R    | CTTCTGTACAATACGGGTTG            | fine mapping                           |
| 57241seq_F           | CGGAGCGTCTGAGATCTGAC            | SNP sequencing                         |
| 57241seq_R           | CCCAGCATTGAATTGGGAC             | SNP sequencing                         |
| TA57249seq_F         | GATGATCGGTGGAGATAGTC            | SNP sequencing                         |
| TA57249seq_R         | ATGGATGCACATCTGTCAG             | SNP sequencing                         |
| TA57249seqb_F        | GAGATAGTCTTACGGCTAGG            | SNP sequencing                         |
| TA57249seqb_R        | CTCTCTTATGAATCTGTCAG            | SNP sequencing                         |
| TT57259seq_F         | CTTCCAGCTGCATGCAATG             | SNP sequencing                         |
| TT57259seq_R         | TTAATTAGCCGTAGCATTGG            | SNP sequencing                         |
| SSR_chr.9_57337_F    | TGACGCTTCGGTCCAACCAAG           | fine mapping                           |
| SSR_chr.9_57337_R    | AACACAGGATGAGGACCATG            | fine mapping                           |
| SbYUC7_F2            | CTAGCTCATCGTTCACCCACC           | fine mapping                           |
| SbYUC7_R1            | GGGAGAAGAGACTGTCCATTG           | fine mapping                           |
| Sb09g028270_F1       | ATTTGACAGTGGATCTGATC            | sequencing ( <i>Sobic.009G229800</i> ) |
| Sb09g028270_R1       | GAACATACGAAATGTTAGTG            | sequencing ( <i>Sobic.009G229800</i> ) |
| Sb09g028270_F2       | ACACCTGGGATAATCCTTGC            | sequencing ( <i>Sobic.009G229800</i> ) |
| Sb09g028270_R2       | TGAACCACCAGAATAGGCTG            | sequencing ( <i>Sobic.009G229800</i> ) |
| Sb09g028270_F3       | CCAGATGTTCCATATGCTCG            | sequencing ( <i>Sobic.009G229800</i> ) |
| Sb09g028270_R3       | ACCTTTGAACACGTCCAAAGC           | sequencing ( <i>Sobic.009G229800</i> ) |
| Sb09g028270_F4       | GATAAATCATGTGCTCACGC            | sequencing ( <i>Sobic.009G229800</i> ) |
| Sb09g028270_R4       | GATTGATTGTGTTACACAAG            | sequencing ( <i>Sobic.009G229800</i> ) |
| Sb09g028270_F5       | GGCAGTACGTACAATCAAG             | sequencing ( <i>Sobic.009G229800</i> ) |
| Sb09g028270_R5       | ACTGAAGACATCTCTGACTG            | sequencing ( <i>Sobic.009G229800</i> ) |
| Sb09g028270_F6       | AGGAGTTACTACAATCTGAG            | sequencing ( <i>Sobic.009G229800</i> ) |
| Sb09g028270_R6       | CAAATAATCTACGTGCTTCT            | sequencing ( <i>Sobic.009G229800</i> ) |
| Sb09g028270_F7       | CGTGTCTGACTACTCAGATC            | sequencing ( <i>Sobic.009G229800</i> ) |
| Sb09g028270_R7       | GCACATGCTTCTCATGACG             | sequencing ( <i>Sobic.009G229800</i> ) |
| 09g028310_1F         | GGCGACTGTTCAACTCAA              | sequencing ( <i>Sobic.009G230200</i> ) |
| 09g028310_1R         | GGCCGTACACTTGATAAATC            | sequencing ( <i>Sobic.009G230200</i> ) |
| 09g028310_2F         | ATTACGAGAAATATTCAAG             | sequencing ( <i>Sobic.009G230200</i> ) |
| 09g028310_2R         | GCCCGAGATTGGCATCTCAG            | sequencing ( <i>Sobic.009G230200</i> ) |
| 09g028310_3F         | AGAGTAGTAGTTAGATTG              | sequencing ( <i>Sobic.009G230200</i> ) |
| 09g028310_3R         | CCTTGCCATGGCGCATAACG            | sequencing ( <i>Sobic.009G230200</i> ) |
| 09g028310_4F         | CTACTTCCGAACCGCTTCCG            | sequencing ( <i>Sobic.009G230200</i> ) |
| 09g028310_4R         | AGGTTACGAAACGGGTACAG            | sequencing ( <i>Sobic.009G230200</i> ) |
| 09g028310_5F         | GTTTCATCATGTTCCGGCGGTC          | sequencing ( <i>Sobic.009G230200</i> ) |
| 09g028310_5R         | CAAGGTGACCTTACGCTCGG            | sequencing ( <i>Sobic.009G230200</i> ) |
| 09g028310_6F         | GCCGTACCTCAGCGATGATG            | sequencing ( <i>Sobic.009G230200</i> ) |
| 09g028310_6R         | GGACCAGAATGAAACATCCA            | sequencing ( <i>Sobic.009G230200</i> ) |
| 09g028275_ex1_RT_F   | TCAGAAGGTGGATAAATCATGTGCCTACGC  | RT-PCR                                 |
| 09g028275_ex2_RT_R   | CTCGATTCTTGCATCTGAGCAAGAATGGCC  | RT-PCR                                 |
| 028280ex2_RT1_F      | CTCTGCTCTTCCCCTGTCCA            | RT-PCR                                 |
| 028280ex4_RT2_R      | TCATTTGTAGATCTGACGC             | RT-PCR                                 |
| 09g028290_3'UTR_RT_F | ACCGTGAAGCGGGCGTGGAGATACTGGAG   | RT-PCR                                 |
| 09g028290_3'UTR_RT_R | TCGTGCCCTGTACCGGCCAGACAGGTAC    | RT-PCR                                 |
| 09g028300_3'UTR_RT_F | GACCCGCGAAGGAAGCTAAGTGGCAAGAC   | RT-PCR                                 |
| 09g028300_3'UTR_RT_R | GCCAGAACCACGACCTTCAGAGTTTCAG    | RT-PCR                                 |
| 09g028310_ex1_RT_Fb  | CATGGCAAGCCGCTCATGTTCCGATACCAGC | RT-PCR                                 |
| 09g028310_ex2_RT_R   | CAGCCAGTCCGAGGTGTCGCACGGCTCAG   | RT-PCR                                 |
| sb_01g030340_F       | GGTTCGGGAGGTGGCCTAGGT           | RT-PCR ( <i>sorghum ubiquitin</i> )    |
| sb_01g030340_R       | AGCATGTACATTCACAGCGGTA          | RT-PCR ( <i>sorghum ubiquitin</i> )    |
| Sb_PRR37_F1          | GCTTATTTGACATGGCAATG            | sequencing ( <i>SbMa1</i> )            |
| Sb_PRR37_R1          | GACAGCATAGAGCTGTGAAC            | sequencing ( <i>SbMa1</i> )            |
| Sb_PRR37_F2b         | GCTAGCTAGGAATAAGTTAC            | sequencing ( <i>SbMa1</i> )            |
| Sb_PRR37_R2b         | ACCGTTAGAGCAGAATAATG            | sequencing ( <i>SbMa1</i> )            |
| Sb_PRR37_F3          | CACGGAACGAGTGTGGTTGG            | sequencing ( <i>SbMa1</i> )            |
| Sb_PRR37_R3          | CACCATCGTCATCCTCTGG             | sequencing ( <i>SbMa1</i> )            |
| Sb_PRR37_F4          | ACTAATCTCGACGAACTACG            | sequencing ( <i>SbMa1</i> )            |
| Sb_PRR37_R4          | GGATGATGCTTCGGAATAAC            | sequencing ( <i>SbMa1</i> )            |
| Sb_PRR37_F5c         | GCCACCTCTGACACGTAG              | sequencing ( <i>SbMa1</i> )            |
| Sb_PRR37_R5c         | CTAACTCAGATAGCTAGGTG            | sequencing ( <i>SbMa1</i> )            |
| Sb_PRR37_F6          | GCCACTACGATAGTATATAC            | sequencing ( <i>SbMa1</i> )            |
| Sb_PRR37_R6          | ATCCTCCTTGGACCATGCAC            | sequencing ( <i>SbMa1</i> )            |
| Sb_PRR37_F7          | CGGCAAGAGGATAGATCTAG            | sequencing ( <i>SbMa1</i> )            |
| Sb_PRR37_R7          | AGAGAAGCCAAAGTCTCTTG            | sequencing ( <i>SbMa1</i> )            |
| Sb_PRR37_F8          | ACTGTTCTCCAACAATAAGC            | sequencing ( <i>SbMa1</i> )            |
| Sb_PRR37_R8          | TCTTGCCATATCACAGGACAC           | sequencing ( <i>SbMa1</i> )            |
| Sb_PRR37_F9          | GACTTTGAATCTTTAAGGCC            | sequencing ( <i>SbMa1</i> )            |
| Sb_PRR37_R9          | ATGGTATACTACTCTTTCGC            | sequencing ( <i>SbMa1</i> )            |
| Sb_PRR37_F10         | GGTAAGAATGAAATACCTC             | sequencing ( <i>SbMa1</i> )            |
| Sb_PRR37_R10         | ATAGTGTGAGTCTCTTCGCC            | sequencing ( <i>SbMa1</i> )            |
| Sb_PRR37_F11         | TCTAATACTCTTACCCTTG             | sequencing ( <i>SbMa1</i> )            |
| Sb_PRR37_R11         | GTCAAACCTTACCCTTGTGG            | sequencing ( <i>SbMa1</i> )            |
| Sb_PRR37_F12         | CATAGGTTTGGCTACCATAG            | sequencing ( <i>SbMa1</i> )            |
| Sb_PRR37_R12         | CCGTCTCCATACATGCTGCC            | sequencing ( <i>SbMa1</i> )            |
| Sb_PRR37_F13         | TGGAATGATGCTAGGAATAC            | sequencing ( <i>SbMa1</i> )            |
| Sb_PRR37_R13         | AGAATTCACCTGCAGACCTAG           | sequencing ( <i>SbMa1</i> )            |
| Sb_PRR37_F14b        | TGGTCAATCCACATAGCAGC            | sequencing ( <i>SbMa1</i> )            |
| Sb_PRR37_R14b        | TCTCGTACGGCATTCCATGC            | sequencing ( <i>SbMa1</i> )            |
| Sb_PRR37_F15         | GTATTCGAGAAATAGTGTAC            | sequencing ( <i>SbMa1</i> )            |
| Sb_PRR37_R15         | GAAGTCGTGGAATCAACC              | sequencing ( <i>SbMa1</i> )            |
| Sb_PRR37_F16         | TGGTACTGATTCACCTAATGC           | sequencing ( <i>SbMa1</i> )            |
| Sb_PRR37_R16         | AGGGCAACATTACCCTGTCC            | sequencing ( <i>SbMa1</i> )            |

|                         |                                      |                                |
|-------------------------|--------------------------------------|--------------------------------|
| Sb_PRR37_F17            | AATGACATGGGTTCCACTAC                 | seqencing ( <i>SbMa1</i> )     |
| Sb_PRR37_R17            | AGTCCTGCCCAATATAATGC                 | seqencing ( <i>SbMa1</i> )     |
| Sb_PRR37_F18            | TGCATGTTTGTGGTTCAGGC                 | seqencing ( <i>SbMa1</i> )     |
| Sb_PRR37_R18            | AGCTAACACAACCTGCTGTTT                | seqencing ( <i>SbMa1</i> )     |
| Dw3_F1                  | GCTCTGCGCCAGCCACTCTG                 | seqencing ( <i>Dw3</i> )       |
| Dw3_R1                  | TGAGCGACTGATGTGATTG                  | seqencing ( <i>Dw3</i> )       |
| Dw3_F2                  | CGTCCTCATGGGCAGGTAAC                 | seqencing ( <i>Dw3</i> )       |
| Dw3_R2                  | CGATCATGACGGAGAACATG                 | seqencing ( <i>Dw3</i> )       |
| Dw3_F3                  | TGGGTCACCGCAGCGGCTTC                 | seqencing ( <i>Dw3</i> )       |
| Dw3_R3                  | AATGTACGCCTGCTACAGTG                 | seqencing ( <i>Dw3</i> )       |
| Dw3_F4d                 | GAGTAGGAGTGGTTCAATTG                 | seqencing ( <i>Dw3</i> )       |
| Dw3_R4d                 | GGCAGGCAGGCATGGTGGTC                 | seqencing ( <i>Dw3</i> )       |
| Dw3_F5                  | GCAATGCTCGCATGCCATG                  | seqencing ( <i>Dw3</i> )       |
| Dw3_R5                  | ACTCGGGCGAGTTCATCCTG                 | seqencing ( <i>Dw3</i> )       |
| Dw3_F6                  | TTTCCACCTCCGACTTCAC                  | seqencing ( <i>Dw3</i> )       |
| Dw3_R6                  | TCTTGCCTCCGCGTTGAAC                  | seqencing ( <i>Dw3</i> )       |
| Dw3_F7                  | TCCGTCATCGTCCAGAACTC                 | seqencing ( <i>Dw3</i> )       |
| Dw3_R7                  | GCCCGCAGGTTGTACTTGCG                 | seqencing ( <i>Dw3</i> )       |
| Dw3_F8b                 | AGCACGTGGACTTCTCGTAC                 | seqencing ( <i>Dw3</i> )       |
| Dw3_R8b                 | TGCGATCATGGAGTACCATC                 | seqencing ( <i>Dw3</i> )       |
| 01g0103800RNAi_EcoRV_F  | CGATATCGCCAATCCAACAAAGTGCG           | RNAi construction              |
| 01g0103800RNAi_SmaI_F   | TCCCCCGGGCCCAATCCAACCAAGTGCG         | RNAi construction              |
| 01g0103800RNAi_XbaI_R   | GCTCTAGAGACCTTTGCTCAGGGATGGCG        | RNAi construction              |
| 01g0103800RNAi_SpeI_R   | GGACTAGTGACCTTTGCTCAGGGATGGCG        | RNAi construction              |
| 09gRNAicheck_F1         | C CGGATGCGCAGCGAAGCG                 | RNAi construction              |
| 09gRNAicheck_R1         | CTGAGGCTCGTTAGCATAGC                 | RNAi construction              |
| 5-liker_MCS-Nos 3 UTR_F | TGTGAATTACAGGTGACCAGCTCG             | RNAi construction              |
| 5-Nos 3 UTR_R           | TATCGCGTATTAATGTATAAATTGC            | RNAi construction              |
| Os01g_RT_F              | TTTTCCGGAGAATGTGACCCGC               | RT-PCR ( <i>Os01g0103800</i> ) |
| Os01g_RT_R              | AATTAGGTGATTGGGCAAGTC                | RT-PCR ( <i>Os01g0103800</i> ) |
| Os03g_RT_F              | GAATGTGACCCGAGCAACCG                 | RT-PCR ( <i>Os03g0270700</i> ) |
| Os03g_RT_R              | AGAAGGACGCCGAGAAAGAT                 | RT-PCR ( <i>Os03g0270700</i> ) |
| Actin_F                 | CATCTTGGCATCTCTCAGCAC                | RT-PCR (rice actin)            |
| Actin_R                 | AACTTTGTCCACGCCTAATGAA               | RT-PCR (rice actin)            |
| SSR_chr.9_57179_F       | TAAGATTCTCCGTACATAG                  | NIL genotyping ( <i>Dw1</i> )  |
| SSR_chr.9_57179_R       | ATAGACCGTAAAGTTGCACG                 | NIL genotyping ( <i>Dw1</i> )  |
| SSR_chr.9_57354_F       | TTTCGGATACTGTAACCGAC                 | NIL genotyping ( <i>Dw1</i> )  |
| SSR_chr.9_57354_R       | TTTAGAGATTGCTGTCGC                   | NIL genotyping ( <i>Dw1</i> )  |
| SSR3_4143_F             | ATCTCCTTTAATTACGACCGACCGA            | NIL genotyping ( <i>Dw3</i> )  |
| SSR3_4143_R             | GTTTCTCCATGGATCGACCCTTTTGTT          | NIL genotyping ( <i>Dw3</i> )  |
| SSR3_4197_F             | ACGATCGAGTTTTTCTTGTTGTTCT            | NIL genotyping ( <i>Dw3</i> )  |
| SSR3_4197_R             | GTTTCATGCATCCATGTTCTGCTTCTCT         | NIL genotyping ( <i>Dw3</i> )  |
| BAR_RBCTer_F            | CGACTCTAGAGGATCCATGGCAATTACCTTATCCGC | Sorghum complementation        |
| BAR_RBCTer_R            | GCAGGTGACGGATCCCAACATATAGTAGATGCGGAC | Sorghum complementation        |
| pUbiin_BAR_RBCTer_F     | TGGGCGCGCCGGGCTGCAGCGTGACCCGGTGC     | Sorghum complementation        |
| pUbiin_BAR_RBCTer_R     | TATGGAGAAACTCGACAACATATAGTAGATGCGGAC | Sorghum complementation        |
